# Supplementary material for: Guide Positioning Sequencing identifies aberrant DNA methylation patterns that alter cell identity and tumor-immune surveillance networks
Source: PubMed Central journal article supplement — Genome Res. 2019 Feb;29(2):270–80. doi: 10.1101/gr.240606.118 (PMC6360814; doi:10.1101/gr.240606.118), 2019-02
Supplement: supp_gr.240606.118_Supplemental_Fig_S3.pdf [file supp_gr.240606.118_Supplemental_Fig_S3.pdf]

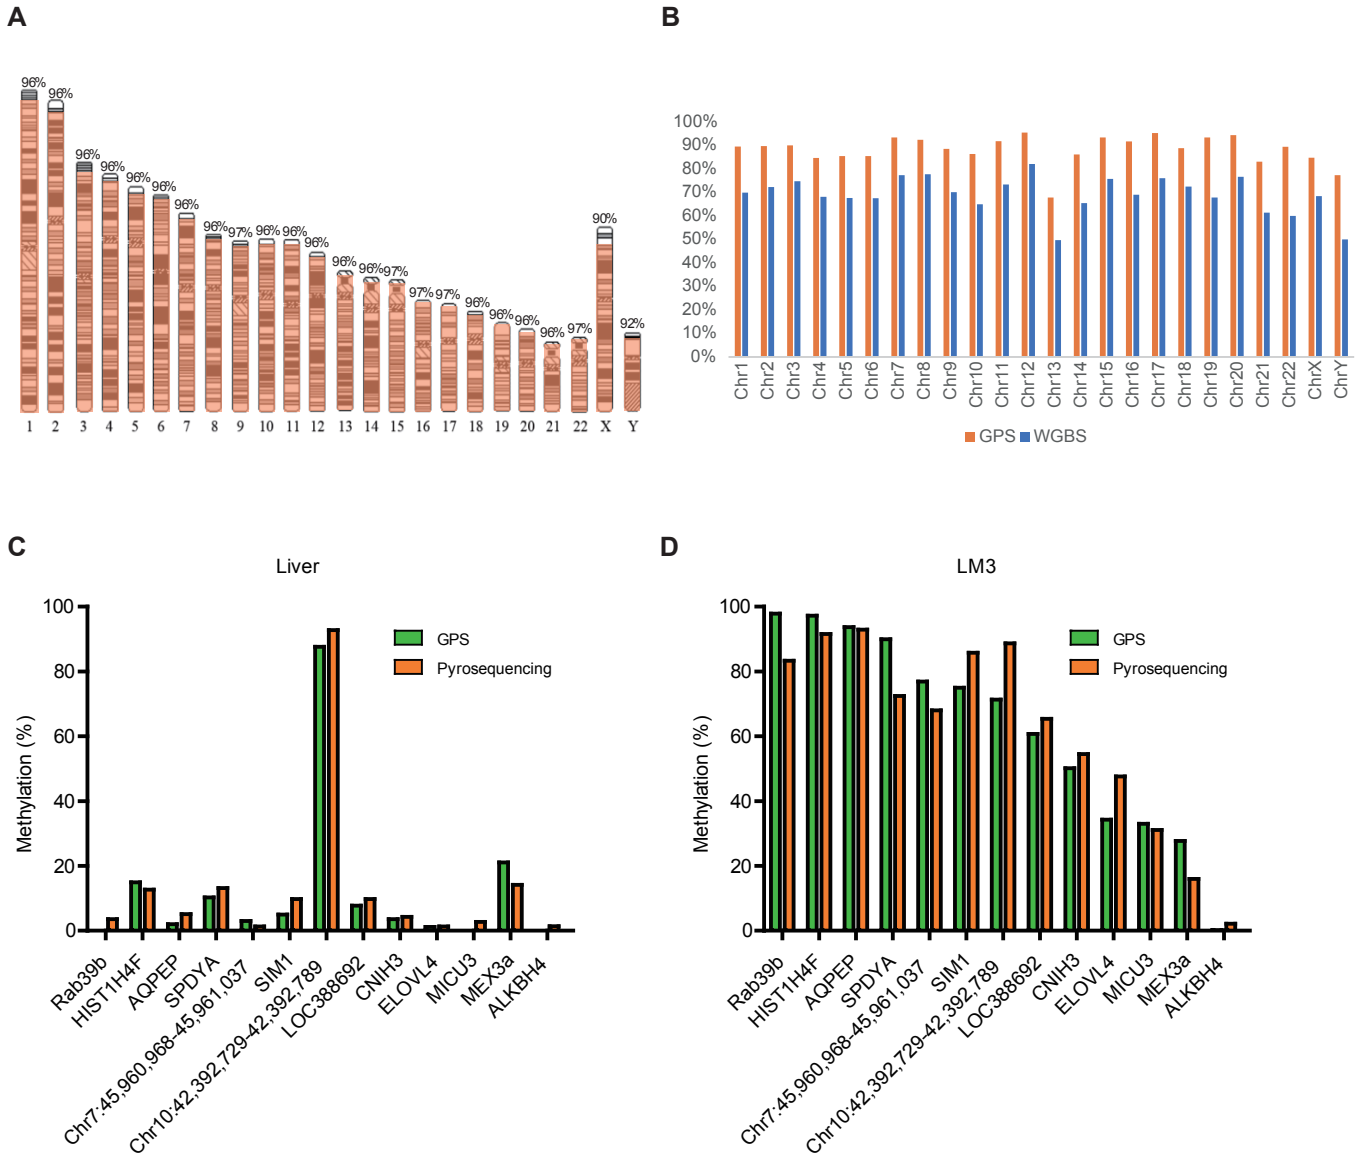

**Supplementary Figure S3. Cytosine coverage on each chromosome and verification of DNA methylation detection by GPS.**

(A) Cytosine coverage of DNA methylation detection by GPS in Liver sample. The number on the top of each chromosome represents the average cytosine coverage rate. (B) Cytosine coverage comparison between GPS and WGBS in 97L sample with same bisulfite-converted reads. (C) Cytosine coverage of DNA methylation detection by GPS in Liver sample. The number on the top of each chromosome represents the average cytosine coverage rate. (D) Cytosine coverage comparison between GPS and WGBS in 97L sample with same bisulfite-converted reads.
