# Supplementary material for: Guide Positioning Sequencing identifies aberrant DNA methylation patterns that alter cell identity and tumor-immune surveillance networks
Source: PubMed Central journal article supplement — Genome Res. 2019 Feb;29(2):270–80. doi: 10.1101/gr.240606.118 (PMC6360814; doi:10.1101/gr.240606.118), 2019-02
Supplement: supp_gr.240606.118_Supplemental_Fig_S4.pdf [file supp_gr.240606.118_Supplemental_Fig_S4.pdf]

**A**

| Type                                | GPS              | WGBS            |
|-------------------------------------|------------------|-----------------|
| Reads used for call SNVs            | Read2            | Read1+Read2     |
| Number of Reads                     | 375M             | 375M            |
| Bioinformatic tool                  | VarScan (v2.3.9) | BISCUIT(v0.2.2) |
| Detected SNVs                       | 127,722          | 82,498          |
| SNVs overlapped with dbSNP database | 126,099          | 45,604          |
| Percentage                          | 98.7%            | 55.3%           |

**B**

| GPS sample                              | Liver     | 97L       | LM3     | Primary liver cancer |
|-----------------------------------------|-----------|-----------|---------|----------------------|
| Variants detected                       | 2,296,462 | 1,368,159 | 901,371 | 737,315              |
| Variants overlapped with dbSNP database | 2,098,262 | 1,200,106 | 770,625 | 603,434              |
| Potential mutants                       | 198,200   | 168,053   | 130,746 | 133,881              |

**C**

| Detected loci located in <i>CAV2</i> | Variant Frequency   |     |     |                     |     |     |                     |     |     |
|--------------------------------------|---------------------|-----|-----|---------------------|-----|-----|---------------------|-----|-----|
|                                      | Chr7 116246781 G->A |     |     | Chr7 116146802 T->C |     |     | Chr7 116146837 A->T |     |     |
| Sample                               | Liver               | 97L | LM3 | Liver               | 97L | LM3 | Liver               | 97L | LM3 |
| Detected by GPS                      | Not Found           | 94% | 98% | Not Found           | 61% | 62% | Not Found           | 64% | 65% |
| Verified by pyro-sequencing          | 5%                  | 97% | 99% | 2%                  | 61% | 61% | 17%                 | 79% | 83% |

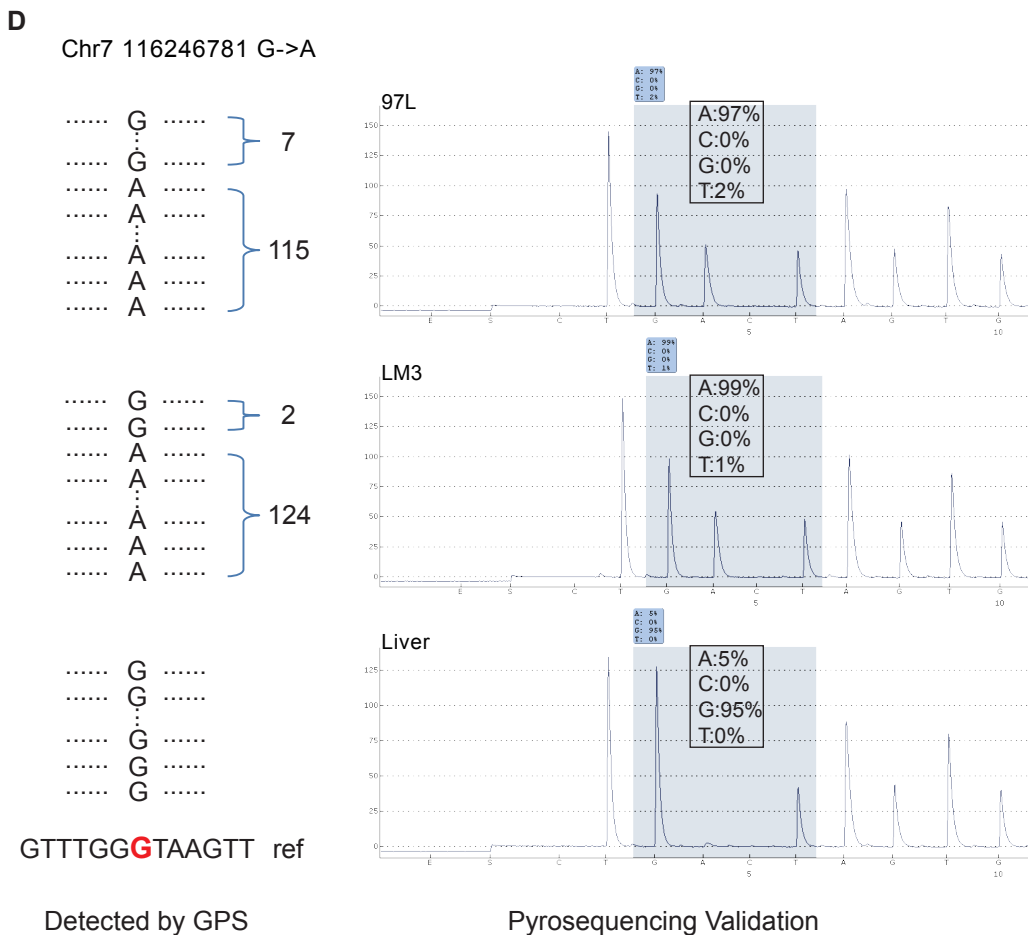

**Supplementary Figure S4. DNA variants including SNPs and mutations detected by GPS.**

(A) Single nucleotide variants detected by GPS and WGBS, respectively. (B) GPS-detected variants within dbSNP database and potential mutants which are not observed in SNP database in Liver and hepatoma cells. (C) Three potential mutants detected by GPS in 97L and LM3, which are located in *CAV2*, a lung-related gene. (D) G to A mutation (Chr7 116246781 G->A) validated by bisulfite pyrosequencing.
