# Supplementary material for: Guide Positioning Sequencing identifies aberrant DNA methylation patterns that alter cell identity and tumor-immune surveillance networks
Source: PubMed Central journal article supplement — Genome Res. 2019 Feb;29(2):270–80. doi: 10.1101/gr.240606.118 (PMC6360814; doi:10.1101/gr.240606.118), 2019-02
Supplement: supp_gr.240606.118_Supplemental_Fig_S6.pdf [file supp_gr.240606.118_Supplemental_Fig_S6.pdf]

**A**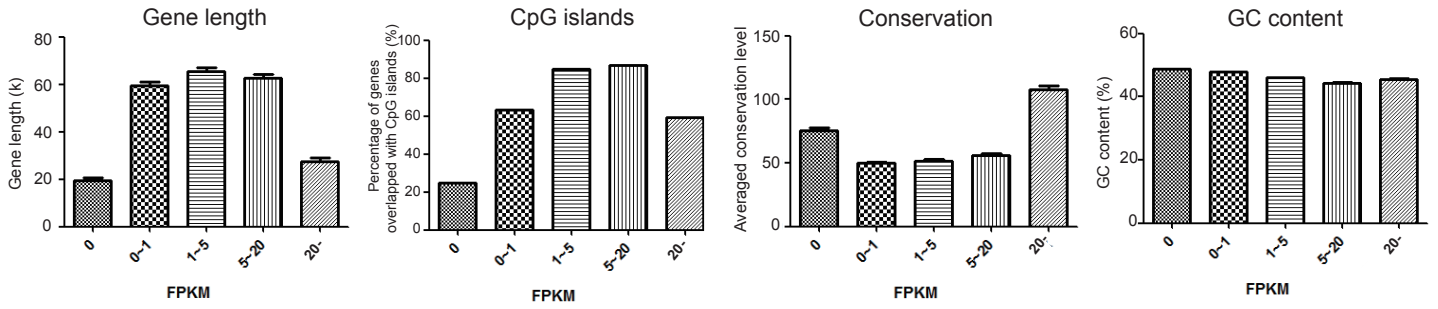**B**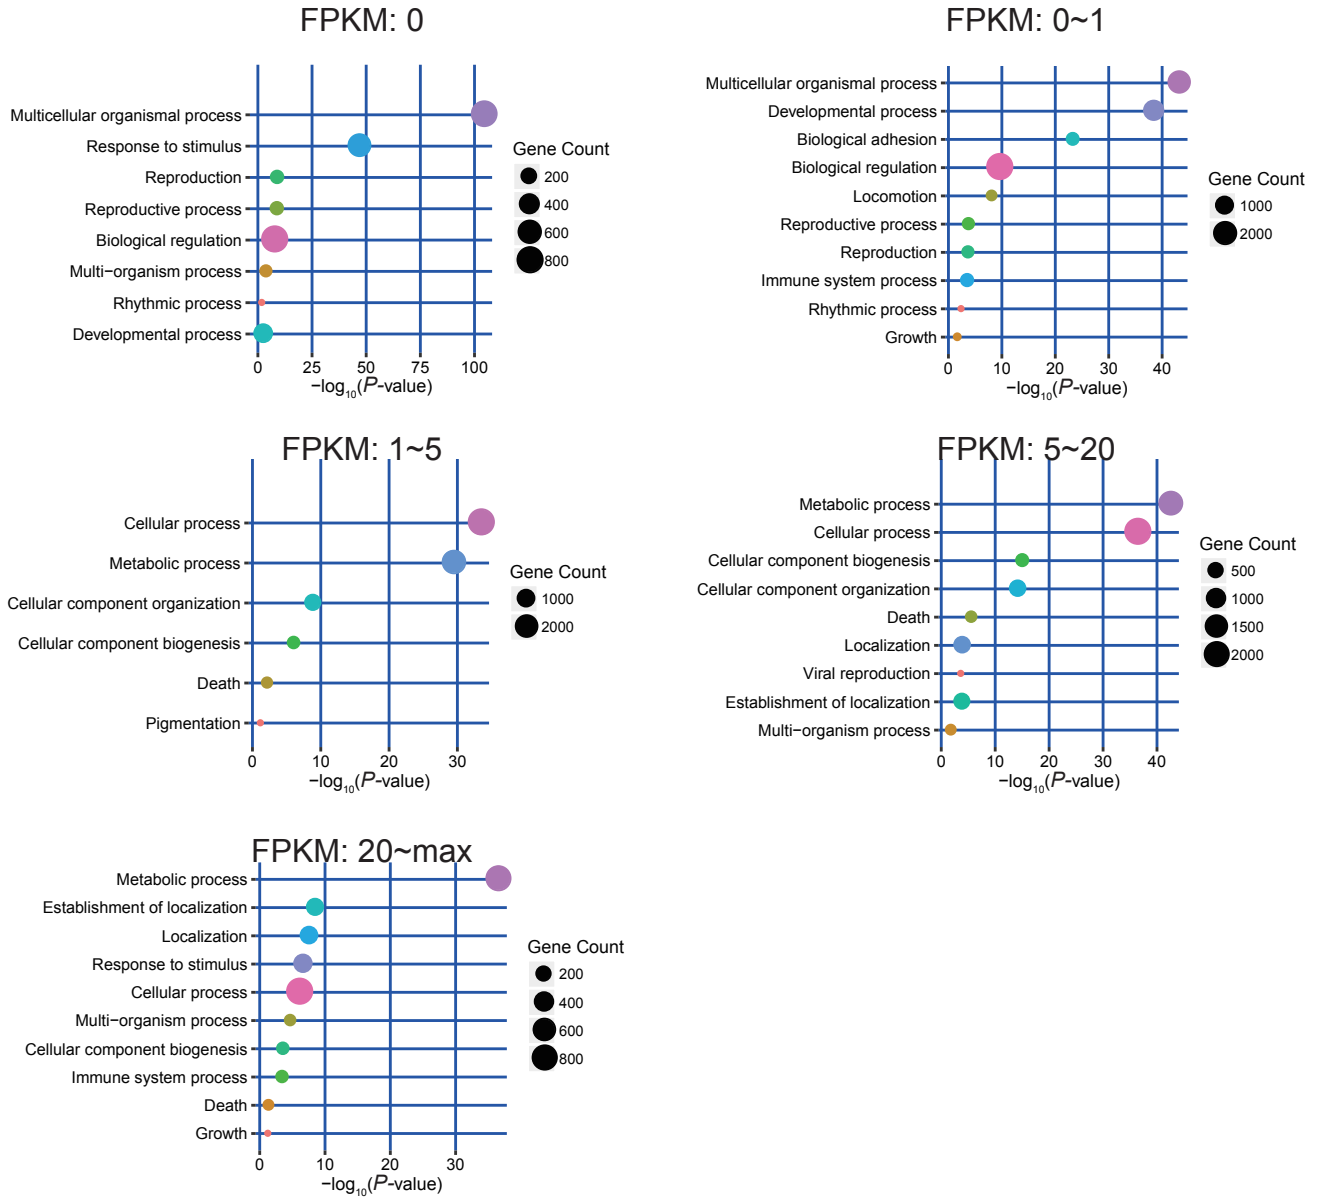

**Supplementary Figure S6. Distribution and Gene Ontology analysis of five categories genes grouped by gene expression.**

(A) Features of five groups of genes with expression of FPKM from 0 to more than 20. Genes with FPKM more than 20 tend to have shorter gene length and higher conservation. (B) Gene Ontology analysis showed that highly expressed genes are categorized in metabolic processes while lowly expressed genes are categorized in multicellular organismal process.
