# Supplementary material for: Guide Positioning Sequencing identifies aberrant DNA methylation patterns that alter cell identity and tumor-immune surveillance networks
Source: PubMed Central journal article supplement — Genome Res. 2019 Feb;29(2):270–80. doi: 10.1101/gr.240606.118 (PMC6360814; doi:10.1101/gr.240606.118), 2019-02
Supplement: supp_gr.240606.118_Supplemental_Fig_S7.pdf [file supp_gr.240606.118_Supplemental_Fig_S7.pdf]

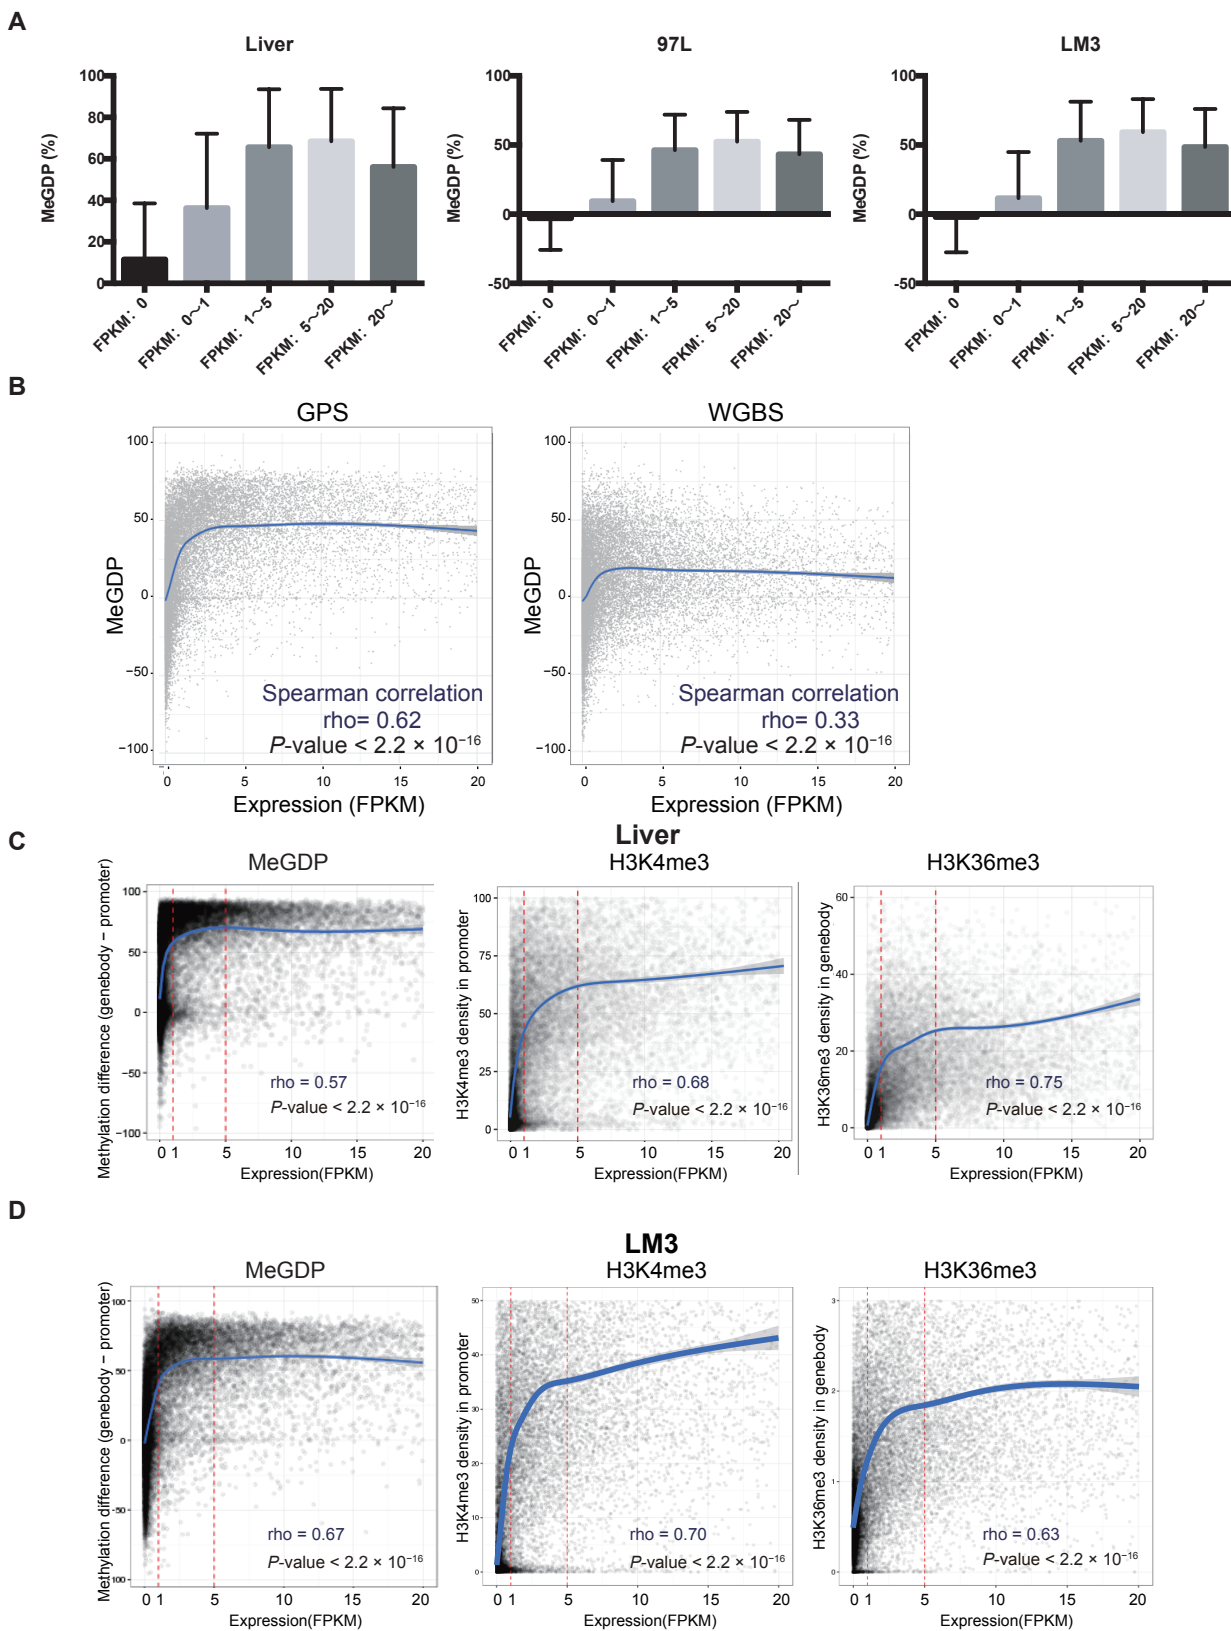

**Supplementary Figure S7. Correlation analysis between MeGDP and gene expression.**

**(A)** Barplots of MeGDP level grouped by gene expression in Liver, 97L and LM3. Highly expressed genes exhibit higher level of MeGDP, except genes with FPKM more than 20. **(B)** Biological significance of MeGDP determined by GPS and WGBS. The Spearman's rank correlation coefficient of gene expression and MeGDP is 0.62 by GPS and 0.33 by WGBS with same amount of raw sequencing data (375M paired reads). **(C)** Correlation between gene expression and DNA methylation, H3K4me3 and H3K36me3 in Liver cells. **(D)** Correlation between gene expression and DNA methylation, H3K4me3 and H3K36me3 in LM3 cells.
