# Supplementary material for: Guide Positioning Sequencing identifies aberrant DNA methylation patterns that alter cell identity and tumor-immune surveillance networks
Source: PubMed Central journal article supplement — Genome Res. 2019 Feb;29(2):270–80. doi: 10.1101/gr.240606.118 (PMC6360814; doi:10.1101/gr.240606.118), 2019-02
Supplement: supp_gr.240606.118_Supplemental_Fig_S9.pdf [file supp_gr.240606.118_Supplemental_Fig_S9.pdf]

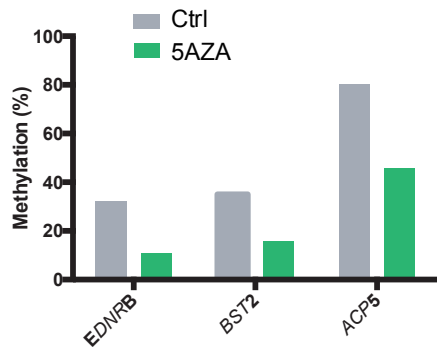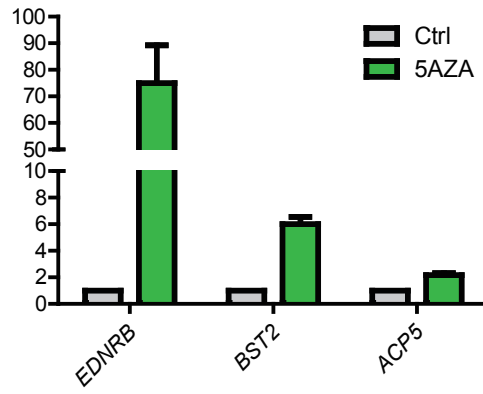

**Supplementary Figure S9. Immune related genes are up-regulated by 5-AZA.**

Methylation level decreased after 5-AZA treatment. *EDNRB*, *ACP5* and *BST2* were up-regulated by 74.7, 6.0 and 2.1 fold, respectively. Real-time PCR was performed after treatment of 5-AZA in 97L cells.
