# Supplementary material for: Guide Positioning Sequencing identifies aberrant DNA methylation patterns that alter cell identity and tumor-immune surveillance networks
Source: PubMed Central journal article supplement — Genome Res. 2019 Feb;29(2):270–80. doi: 10.1101/gr.240606.118 (PMC6360814; doi:10.1101/gr.240606.118), 2019-02
Supplement: supp_gr.240606.118_Supplemental_Fig_S10.pdf [file supp_gr.240606.118_Supplemental_Fig_S10.pdf]

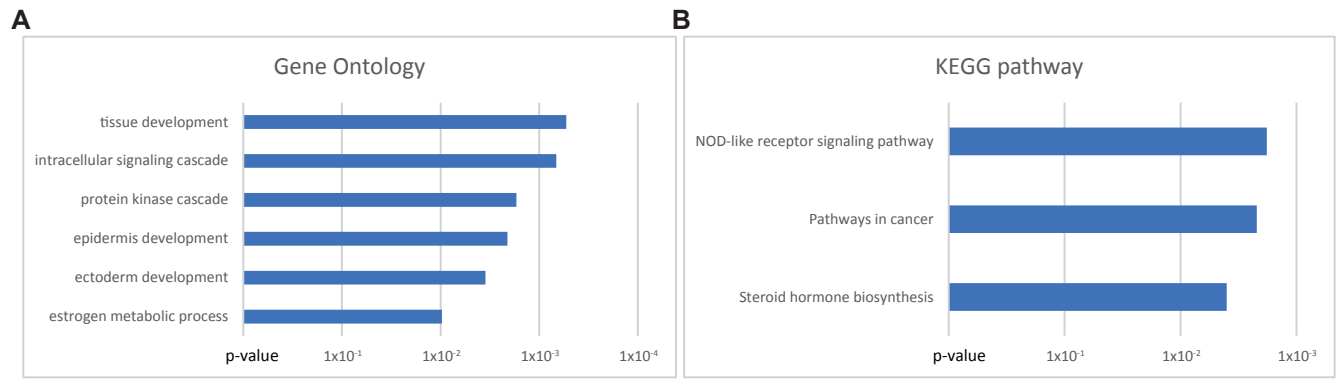

**Supplementary Figure S10. Gene Ontology and KEGG pathway analysis on up-regulated genes with increased MeGDP.**

Upregulated genes with MeGDP increase in 97L compared with Liver are enriched in GO terms such as tissue development and intracellular signaling cascade (**A**) and KEGG pathway such as NOD-like receptor signaling pathway and pathways in cancer (**B**).
