# Supplementary material for: Guide Positioning Sequencing identifies aberrant DNA methylation patterns that alter cell identity and tumor-immune surveillance networks
Source: HighWire-hosted journal article supplement (doi:10.1101/gr.240606.118), 2019-01-22
Supplement: Supplemental_Table_S2.docx [file Supplemental_Table_S2.docx]

**Supplementary Table S2. The cost comparison of GPS and WGBS.**

| Row | **Sample** | **GPS** | | **WGBS** | |
| --- | --- | --- | --- | --- | --- |
| 1 | Replicate | Replicate1 | Replicate2 | Replicate1 | Replicate2 |
| 2 | Filtered reads 1 | 401,506,852 | 347,193,558 | 368,467,266 | 380,473,106 |
| 3 | Sequencing cost | $566 | $490 | $520 | $536 |
| 4 | Methylation calling reads | 200,753,426 | 173,596,779 | 368,467,266 | 380,473,106 |
| 5 | Mapped percentage | 81.2% | 80.7% | 64.6% | 65.4% |
| 6 | 1x coverage CpGs | 43,887,783 | 39,908,912 | 39,805,038 | 35,063,481 |
| 7 | Cost per million covered CpG sites 2 | $12.9 | $12.3 | $13.1 | $15.3 |
| 8 | Average cost per million covered CpG sites | $12.6 | | $14.2 | |
| Notes | | | | | |
| 1: Filtered reads include Read1 and Read2. | | | | | |
| 2:Cost per million covered CpG sites = Row3 / Row6 * 1,000,000 | | | | | |
