# Supplementary material for: Guide Positioning Sequencing identifies aberrant DNA methylation patterns that alter cell identity and tumor-immune surveillance networks
Source: HighWire-hosted journal article supplement (doi:10.1101/gr.240606.118), 2019-01-22
Supplement: Supplemental_Table_S3.docx [file Supplemental_Table_S3.docx]

**Supplementary Table S3. The coverage of cytosines or CpG sites in human chromosomes detected by GPS in Liver cells.**

|  | Cytosine | | | CpG | | |
| --- | --- | --- | --- | --- | --- | --- |
| Chromosome | Total | Detected | Coverage | Total | Detected | Coverage |
| Chr1 | 94040975 | 90457460 | 96.19% | 4568940 | 4449394 | 97.38% |
| Chr2 | 95862508 | 92397363 | 96.39% | 4328670 | 4217604 | 97.43% |
| Chr3 | 77323308 | 74466947 | 96.31% | 3247292 | 3161866 | 97.37% |
| Chr4 | 71776629 | 69025483 | 96.17% | 2947860 | 2866255 | 97.23% |
| Chr5 | 70218570 | 67695097 | 96.41% | 3012908 | 2937142 | 97.49% |
| Chr6 | 66306711 | 63843094 | 96.28% | 2951138 | 2873949 | 97.38% |
| Chr7 | 63308650 | 61008495 | 96.37% | 3137332 | 3058098 | 97.47% |
| Chr8 | 57406605 | 55285626 | 96.31% | 2618270 | 2549673 | 97.38% |
| Chr9 | 49639472 | 47926355 | 96.55% | 2453642 | 2393689 | 97.56% |
| Chr10 | 54607072 | 52653644 | 96.42% | 2702582 | 2632901 | 97.42% |
| Chr11 | 54504837 | 52454100 | 96.24% | 2579974 | 2512647 | 97.39% |
| Chr12 | 53252046 | 51180718 | 96.11% | 2554436 | 2484565 | 97.26% |
| Chr13 | 36827475 | 35458008 | 96.28% | 1607416 | 1564149 | 97.31% |
| Chr14 | 36099080 | 34802390 | 96.41% | 1719558 | 1677181 | 97.54% |
| Chr15 | 34475970 | 33315496 | 96.63% | 1746928 | 1705642 | 97.64% |
| Chr16 | 35332029 | 34152954 | 96.66% | 2195552 | 2147521 | 97.81% |
| Chr17 | 35428297 | 34227197 | 96.61% | 2311200 | 2257674 | 97.68% |
| Chr18 | 29702357 | 28604074 | 96.30% | 1354428 | 1318588 | 97.35% |
| Chr19 | 26989401 | 25872555 | 95.86% | 2114752 | 2059051 | 97.37% |
| Chr20 | 26257241 | 25312219 | 96.40% | 1435444 | 1400353 | 97.56% |
| Chr21 | 14334934 | 13816644 | 96.38% | 760888 | 741737 | 97.48% |
| Chr22 | 16745220 | 16185121 | 96.66% | 1156194 | 1131108 | 97.83% |
| ChrX | 59679185 | 53618823 | 89.85% | 2492802 | 2300356 | 92.28% |
| ChrY | 10252460 | 9466122 | 92.33% | 435812 | 411375 | 94.39% |
| ChrM | 7373 | 7348 | 99.66% | 878 | 875 | 99.66% |
| Total | 1170378405 | 1123233333 | 95.97% | 56434896 | 54853393 | 97.20% |
