# Supplementary material for: Guide Positioning Sequencing identifies aberrant DNA methylation patterns that alter cell identity and tumor-immune surveillance networks
Source: HighWire-hosted journal article supplement (doi:10.1101/gr.240606.118), 2019-01-22
Supplement: Supplemental_Table_S4.xlsx [file Supplemental_Table_S4.xlsx]

## Sheet: Supplementary Table S4
Supplementary Table S4. The integrated information of genes including expression, meGDP, MBS and H3K27ac density.
Gene					Liver							97L
Chr	start	end	name	strand	FPKM	meGDP (%)	Promoter meth (%)	Genebody meth (%)	MBS upstream (kb)	MBS downstream (kb)	H3K27ac_density	FPKM	meGDP (%)	Promoter meth (%)	Genebody meth (%)	MBS upstream (kb)	MBS downstream (kb)	H3K27ac_density
Chr1	11873	14409	DDX11L1	+	0.109404	-9.78159	79.0546	69.2731	0	0.1	199	0.284593	-62.6588	75.021	12.3621	0.1	0.1	0
Chr1	17368	17436	MIR6859-1	-	0	NA	91.5627	NA	0	0.1	0	0.00647036	NA	73.8641	NA	0.1	0.1	204
Chr1	14361	29370	WASH7P	-	0.954476	80.97	4.95729	85.9273	0.9	1.3	1592	2.76745	65.7043	2.84037	68.5446	6.5	1.5	2010
Chr1	34610	36081	FAM138A	-	0.184532	-18.5651	63.8087	45.2436	0	0.1	0	0.0814519	-7.22988	19.0326	11.8027	0.1	0.1	0
Chr1	69090	70008	OR4F5	+	0	NA	75.5917	NA	0	0.1	0	0.00647036	NA	11.1471	NA	5.8	1.9	0
Chr1	134772	140566	LOC729737	-	0.771284	2.44741	81.0117	83.4591	3.8	0.5	199	0.190203	21.2344	31.4618	52.6963	5.6	0.6	0
Chr1	323891	328581	LOC100132287	+	0.0357686	-4.95101	82.9867	78.0357	0	0.1	0	0.057244	9.44711	48.8167	58.2638	1.3	0.4	0
Chr1	323891	328581	LOC100133331	+	0.302073	-4.95101	82.9867	78.0357	0	0.1	0	0.0964446	9.44711	48.8167	58.2638	1.3	0.4	0
Chr1	367658	368597	OR4F16	+	0.0725287	NA	62.2	NA	1	4.8	0	0.00647036	NA	5.0625	NA	6.7	1.9	0
Chr1	567704	567793	MIR6723	-	3295.98	NA	6.1056	NA	3	3.6	244	1877.21	NA	3.45746	NA	6.6	3.4	0
Chr1	621095	622034	OR4F29	-	0.0725287	NA	62.189	NA	0.7	5.1	0	0.00647036	NA	5.6025	NA	6.4	1.4	0
Chr1	661138	665731	LOC100133331	-	0.334455	-6.8641	82.0804	75.2163	0.8	1.9	2388	0.125051	-3.74045	58.7394	54.999	0.1	0.1	335
Chr1	700244	714068	LOC100288069	-	3.31729	67.4749	17.8682	85.343	1.4	0.7	14710	0.657822	39.1689	16.2513	55.4202	2.4	0.5	4985
Chr1	752750	755214	FAM87B	+	0.410492	23.773	53.1239	76.8969	2.2	1.8	7275	0.152906	28.3876	30.6173	59.0049	4.9	1.3	3179
Chr1	761585	762902	LINC00115	-	1.18613	16.3261	1.85391	18.18	1.5	1.5	24262	0.442472	70.489	0.940961	71.43	3.1	1.4	8392
Chr1	762970	794826	LINC01128	+	4.51823	77.8701	1.85391	79.724	1.4	1.5	40631	0.337601	60.6304	0.940961	61.5714	3.1	1.8	19858
Chr1	803450	812182	FAM41C	-	0.873635	-28.5094	81.4862	52.9768	0	0.1	1990	0.680954	-33.3753	44.2635	10.8882	0.1	0.1	6383
Chr1	852952	854817	LOC100130417	-	0.119601	7.8272	66.7701	74.5973	0	0.1	1574	0.00647036	-10.7504	14.6231	3.87264	0.1	0.1	7197
Chr1	861120	879961	SAMD11	+	0.0454744	32.1278	9.70036	41.8281	2.5	0.7	42706	0.196889	5.70053	3.48585	9.18638	6.2	2.3	131938
Chr1	879582	894679	NOC2L	-	4.19768	77.4792	14.2212	91.7004	2.2	1.1	20774	19.946	58.0012	4.26731	62.2686	3.8	1.7	63471
Chr1	895966	901099	KLHL17	+	0.162112	74.0473	20.167	94.2143	2.3	1	1862	0.67792	59.5736	17.2977	76.8712	3.8	0.9	9621
Chr1	901876	910484	PLEKHN1	+	0	39.2795	22.0997	61.3792	0.4	1.3	8666	0.153127	46.704	9.74436	56.4484	1.9	1.2	55449
Chr1	910578	917497	PERM1	-	0	1.06226	66.2623	67.3246	0.7	1.8	3781	0.0767991	13.4638	20.693	34.1569	1.8	1.2	28319
Chr1	934341	935552	HES4	-	0.176874	-0.709396	2.8194	2.11	2.2	2.1	6206	0.716387	0.634827	1.35517	1.99	4.5	2.2	3280
Chr1	948846	949919	ISG15	+	4.33046	26.8146	39.4925	66.3071	0.7	1.6	40887	9.54942	-0.576552	0.576552	0	3.6	2.5	45205
Chr1	955502	991499	AGRN	+	1.23416	77.1038	2.52675	79.6305	1	1.5	24477	2.41899	38.5334	0.666118	39.1995	6.1	5.1	259090
Chr1	1007125	1009687	RNF223	-	0.063342	3.10987	73.2144	76.3243	0	0.1	1194	0.00647036	-0.41748	15.9538	15.5363	2.8	2.3	7573
Chr1	1017197	1051736	C1orf159	-	0.15984	89.1398	3.15818	92.2979	1.1	1.4	20217	1.10813	79.3858	1.78355	81.1694	2.3	1.2	54662
Chr1	1072396	1079434	LINC01342	+	0.0526062	45.9686	40.4029	86.3714	0.4	1	2568	0.00647036	28.1039	9.47301	37.5769	3.1	1.7	24404
Chr1	1102483	1102578	MIR200B	+	0	12.9915	77.9185	90.91	0	0.1	16	0.00647036	-7.3325	7.3325	0	1.3	1.3	503
Chr1	1103242	1103332	MIR200A	+	0	NA	78.2424	NA	0	0.1	0	0.00647036	NA	11.5624	NA	1.4	0.6	689
Chr1	1104384	1104467	MIR429	+	0	NA	77.844	NA	0	0.1	25	0.00647036	NA	18.1994	NA	0.1	0.1	427
Chr1	1109285	1133313	TTLL10	+	0	31.5581	48.527	80.0851	0.9	0.7	7214	0.1279	-14.9965	48.5582	33.5617	0.1	0.1	45482
Chr1	1138887	1142089	TNFRSF18	-	0	47.8761	21.9854	69.8615	1	1	1260	0.392097	32.9288	5.04972	37.9786	2.6	2	24026
Chr1	1146705	1149548	TNFRSF4	-	0.0997153	9.96138	67.0857	77.0471	1.6	2.1	2526	0.130639	36.5419	12.2917	48.8336	3.8	2.1	15496
Chr1	1152287	1167447	SDF4	-	23.0532	73.944	18.1354	92.0794	0.9	1.6	46352	22.1102	56.0094	27.8437	83.8531	2.3	1.7	84701
Chr1	1167628	1170420	B3GALT6	+	1.55547	71.5995	24.4979	96.0974	1.7	0.8	4658	2.87637	52.8244	34.3817	87.2062	2.3	0.5	3985
Chr1	1177825	1182102	FAM132A	-	0	52.4534	29.7217	82.1751	1.2	0.8	2388	0.209347	4.84088	12.5153	17.3562	1.6	0.4	41310
Chr1	1189291	1209234	UBE2J2	-	3.31776	85.5474	3.95919	89.5066	1	1.7	35092	5.84908	64.9413	3.08298	68.0243	3	2.1	76953
Chr1	1215815	1227409	SCNN1D	+	0.115625	-19.1159	90.0195	70.9035	0	0.1	27278	0.0777548	-6.19056	36.4436	30.253	4.2	4.2	38898
Chr1	1231489	1231550	MIR6726	-	0	NA	94.7375	NA	0	0.1	0	0.00647036	NA	80.1415	NA	0.1	0.1	244
Chr1	1227763	1243269	ACAP3	-	0.852079	83.8195	2.5016	86.3211	1.7	1.2	27159	2.17534	49.5064	0.532246	50.0387	5.8	3.7	151083
Chr1	1243993	1247057	PUSL1	+	0.477851	81.8951	3.53183	85.427	1.8	1.1	14933	3.35708	3.83415	0.492345	4.32649	5.8	1.5	33194
Chr1	1247881	1247946	MIR6727	-	0	NA	91.4634	NA	0	0.1	65	0.00647036	NA	8.75371	NA	1	0.6	673
Chr1	1246964	1260067	CPSF3L	-	5.60517	83.8434	6.00639	89.8498	1.8	1	23414	5.88899	20.9164	0.829714	21.7461	3.3	1.4	150392
Chr1	1260142	1264276	GLTPD1	+	2.40221	79.1515	5.20572	84.3573	1	1.8	30955	1.49359	68.4633	0.829714	69.293	3.4	2	40581
Chr1	1266725	1269844	TAS1R3	+	0.0729209	-6.51544	75.2485	68.7331	1	2.5	18419	0.114564	-35.7629	45.8816	10.1186	0.9	0.3	9193
Chr1	1275029	1275088	MIR6808	-	0	NA	94.9711	NA	0	0.1	0	0.00647036	NA	89.0265	NA	0.1	0.1	118
Chr1	1270657	1284492	DVL1	-	1.3378	80.3143	3.73109	84.0454	2.1	1.5	72662	2.24588	52.6015	0.620806	53.2223	3	1.9	167543
Chr1	1288068	1298921	MXRA8	-	0.475462	-43.4083	80.933	37.5248	0	0.1	30277	0.167589	-13.3288	46.7338	33.405	0.1	0.1	28968
Chr1	1309109	1310818	AURKAIP1	-	24.4079	60.8958	8.43274	69.3285	0.7	1.4	21051	46.3056	53.8548	11.1525	65.0072	1.8	1.3	29331
Chr1	1321090	1334718	CCNL2	-	11.4762	91.0071	1.70588	92.7129	3.2	1.3	33860	4.85133	84.0961	0.442194	84.5382	5.9	1.3	50435
Chr1	1334909	1337426	LOC148413	+	2.31872	36.3917	1.39645	37.7882	1.4	3.1	88132	1.5095	6.60833	0.373521	6.98185	5.9	4.5	76875
Chr1	1337275	1342693	MRPL20	-	13.9286	75.1321	7.26298	82.3951	1.1	1.1	46213	17.8945	40.056	4.57528	44.6312	2	1.1	40698
Chr1	1353799	1356824	ANKRD65	-	0.0944794	-26.0508	69.8326	43.7818	0	0.1	3669	0.00647036	17.5702	28.8095	46.3798	2.3	0.6	7459
Chr1	1361507	1363167	TMEM88B	+	0.0922109	-50.2055	65.9204	15.7149	0.2	2.3	1585	0.00647036	-19.9759	26.6187	6.64286	2.9	2.6	12119
Chr1	1370902	1378262	VWA1	+	0.867058	58.7899	17.0159	75.8058	0.2	1.1	37575	1.63085	53.8993	2.71104	56.6103	3.6	3.4	95972
Chr1	1385068	1405538	ATAD3C	+	1.38782	0.612784	84.8623	85.4751	0	0.1	7347	0.871019	5.67313	50.0207	55.6938	0.1	0.1	33531
Chr1	1407163	1431582	ATAD3B	+	1.29859	91.3527	0.755382	92.1081	1.1	1.4	14375	8.51487	80.6412	0.0574016	80.6986	4.3	1.7	48719
Chr1	1447522	1470067	ATAD3A	+	2.5669	89.3843	2.20498	91.5893	1.2	1.3	19339	9.82818	74.8734	0.462674	75.336	3.8	2.5	43393
Chr1	1470157	1475740	TMEM240	-	0	58.5013	35.2728	93.7741	0.9	1.1	4577	0.00647036	-49.8813	92.4878	42.6065	0.1	0.1	26101
Chr1	1477052	1510262	SSU72	-	13.5625	85.8506	2.75633	88.6069	1.3	1.5	115869	14.6932	58.6008	0.976827	59.5776	4	2.2	152700
Chr1	1533387	1535476	C1orf233	-	0	67.1273	10.5032	77.6305	1	1.1	1541	0.00647036	-20.5169	75.8141	55.2972	0.1	0.1	2744
Chr1	1550794	1565990	MIB2	+	1.2087	82.8666	2.32105	85.1877	1.5	1.6	64293	1.18203	66.9408	0.320149	67.2609	3.7	2	62236
Chr1	1567559	1570030	MMP23B	+	0.19887	47.2941	14.4349	61.729	1.7	1.9	1014	0.0564135	53.4371	34.9975	88.4346	1.9	0.7	1005
Chr1	1568158	1570027	MMP23A	+	0.0359056	55.9489	21.9935	77.9424	2.3	1.3	65	0.103417	39.4957	53.6793	93.175	1.9	0.1	0
Chr1	1592938	1624243	SLC35E2B	-	1.06655	87.2271	0.916693	88.1438	1.2	1.4	41418	0.749408	67.4446	0.163172	67.6077	3	1.8	128587
Chr1	1631377	1633247	MMP23A	+	0.191947	27.5032	49.9481	77.4514	0.4	1.5	0	0.103434	14.5539	78.637	93.1909	0.1	0.1	0
Chr1	1634169	1655791	CDK11A	-	2.90977	74.4593	15.8413	90.3006	0.8	1	16346	1.76704	77.1904	4.83452	82.025	2.1	1.3	38425
Chr1	1570602	1655859	CDK11B	-	3.08361	63.7194	13.4526	77.172	0.8	1.1	104110	1.87033	60.2025	4.94273	65.1452	2.2	1.4	258635
Chr1	1656276	1677438	SLC35E2	-	1.4347	89.4066	1.14604	90.5527	1.4	1.4	13143	0.958566	70.9546	0.278497	71.2331	3.1	1.6	26071
Chr1	1682670	1711508	NADK	-	10.5212	22.947	39.6069	62.5539	0	0.1	473448	9.51439	27.4606	4.79337	32.254	3.7	3.1	510255
Chr1	1716723	1822556	GNB1	-	21.4496	83.6655	4.33128	87.9968	1.1	2	181851	33.8187	58.9695	1.97407	60.9436	5	3.1	433471
Chr1	1846265	1848733	CALML6	+	0.0999739	18.9062	70.8509	89.757	0.7	0.5	1194	0.00647036	27.9998	30.4136	58.4133	3.7	1.4	5512
Chr1	1849028	1850740	TMEM52	-	0.479311	75.6711	18.9633	94.6344	0.7	0.9	6401	0.570553	62.2818	7.18435	69.4661	1.8	1	7546
Chr1	1884751	1935276	KIAA1751	-	0.149095	52.9517	28.1956	81.1472	0.6	0.8	47598	0.135269	30.1962	14.7337	44.9299	1.3	0.8	84860
Chr1	1950767	1962192	GABRD	+	0	64.4361	15.6308	80.0669	1.1	1	13506	0.00647036	-20.5296	45.0667	24.5371	0.1	0.1	17971
Chr1	1981908	2116834	PRKCZ	+	1.29668	85.323	4.5083	89.8313	1.1	1.2	163287	0.00647036	-21.3814	59.137	37.7557	0.1	0.1	225835
Chr1	2115898	2144159	C1orf86	-	1.7364	-2.05164	61.6511	59.5994	1.3	0.5	348200	1.46365	15.539	16.0291	31.5682	1.4	0.8	413718
Chr1	2160133	2241652	SKI	+	4.02602	69.6303	3.91885	73.5491	1.8	4.6	982226	1.03943	45.7363	0.66588	46.4022	7.4	5.1	338679
Chr1	2281852	2284100	LOC100129534	-	0.180872	-1.30437	88.947	87.6426	0	0.1	398	0.17084	-14.9035	41.167	26.2635	0.1	0.1	4918
Chr1	2252695	2322993	MORN1	-	1.20717	81.4308	5.28351	86.7143	2.6	1	58254	1.27888	39.9999	1.73679	41.7367	4.4	1.6	168704
Chr1	2323213	2336885	RER1	+	8.71738	81.2043	5.05384	86.2581	1.1	2.5	67304	6.05474	54.0969	1.73159	55.8285	4.4	2.7	68263
Chr1	2336240	2344010	PEX10	-	2.20451	67.8342	9.64186	77.4761	2.5	0.8	61124	4.03736	31.2333	4.9588	36.1921	5.7	0.8	31236
Chr1	2407753	2436964	PLCH2	+	0.10222	-4.09452	80.4209	76.3263	0	0.1	31584	0.0673821	-10.2591	40.5977	30.3386	0.1	0.1	53976
Chr1	2439974	2458035	PANK4	-	1.87467	84.0155	6.08087	90.0964	0.7	1.2	80195	2.05042	82.747	2.1047	84.8517	6.4	1.7	60649
Chr1	2460183	2461684	HES5	-	0.406473	9.50754	4.80655	14.3141	1	2.2	28666	0.00647036	-3.60915	5.62461	2.01545	1	0.1	2626
Chr1	2481358	2484284	LOC115110	-	0.39595	-2.78583	86.5154	83.7295	0	0.1	8818	0.0711139	4.95356	66.4995	71.4531	0.1	0.1	1263
Chr1	2487804	2495267	TNFRSF14	+	5.20641	81.8498	5.85475	87.7046	1.6	1.5	69230	1.37407	54.5651	1.77296	56.3381	3.5	1.6	39390
Chr1	2487207	2488450	LOC100133445	-	0.324588	-15.5155	17.2721	1.75667	0.7	2.3	91188	0.414632	-7.20864	7.20864	0	3.4	2.6	33896
Chr1	2517898	2522908	FAM213B	+	0.456495	86.3223	4.22993	90.5522	1.4	1.4	10766	2.05204	60.3737	0.26014	60.6338	3.1	1.9	33895
Chr1	2522080	2564481	MMEL1	-	0.054194	-4.46555	74.5667	70.1012	0	0.1	22686	0.157055	23.9018	6.47063	30.3725	3.4	1.9	81582
Chr1	2572806	2706230	TTC34	-	0	20.5209	21.9862	42.5071	0.9	0.9	57162	0.00647036	-67.4165	80.042	12.6255	0.1	0.1	135269
Chr1	2938045	2939467	ACTRT2	+	0	8.3109	76.7309	85.0418	0.6	0.5	1559	0.00647036	-10.4882	18.4285	7.94029	0.7	0.3	1481
Chr1	2976180	2984289	LINC00982	-	0.0989208	14.4684	16.777	31.2454	3.4	0.3	7761	0.00647036	-38.0143	58.2398	20.2255	0.1	0.1	12620
Chr1	2985741	3355185	PRDM16	+	0.0471995	70.1316	4.47093	74.6026	1.7	2	322977	0.327067	-48.0533	76.6237	28.5704	0.1	0.1	950211
Chr1	3044538	3044599	MIR4251	+	0	NA	83.048	NA	0	0.1	161	0.00647036	NA	45.3748	NA	0.1	0.1	226
Chr1	3371146	3397677	ARHGEF16	+	0.454177	72.7947	13.0544	85.8492	1.8	1	34654	3.75575	29.0758	0.846471	29.9222	3.2	1.5	634836
Chr1	3477259	3477354	MIR551A	-	0	NA	77.5818	NA	0.2	0.6	26	0.00647036	NA	20.2745	NA	0.1	0.1	134
Chr1	3404505	3528059	MEGF6	-	0.343823	67.8744	9.64756	77.5219	0.9	1.4	102684	2.01611	-20.5047	47.3253	26.8206	0.1	0.1	431197
Chr1	3541555	3546694	TPRG1L	+	10.5347	90.3703	2.20222	92.5725	1.4	1.3	12816	5.28594	81.4763	0.568327	82.0447	3.7	1.6	28417
Chr1	3547330	3566671	WRAP73	-	0.661613	86.1918	7.49828	93.6901	3.6	0.9	8334	1.67033	52.3377	28.7159	81.0536	2.5	2.1	50989
Chr1	3569128	3652765	TP73	+	0.063584	71.4073	4.36121	75.7685	3.2	1.2	53133	0.094104	12.4444	11.9198	24.3642	2.3	1.6	148216
Chr1	3652547	3663937	TP73-AS1	-	0.604183	71.5709	17.9886	89.5596	0.6	1.2	14800	0.70767	40.9758	34.0062	74.982	2.2	0.7	21735
Chr1	3668964	3688209	CCDC27	+	0	-0.32663	83.3253	82.9987	0.2	0.2	8721	0.00647036	-4.84814	36.8325	31.9843	0.1	0.1	33004
Chr1	3689324	3692546	SMIM1	+	1.99927	22.5712	14.2569	36.8282	0.9	1.1	18105	0.847266	-6.5834	9.46295	2.87955	5.2	4.5	27195
Chr1	3696783	3713068	LRRC47	-	5.95279	80.8834	7.27249	88.1559	0.8	1.4	26589	6.38121	72.5962	9.28659	81.8828	1.8	1.3	32350
Chr1	3728644	3773797	CEP104	-	3.62653	87.0042	5.40141	92.4056	1.3	1.2	28277	2.71574	78.1881	1.43029	79.6184	3.5	1.3	80596
Chr1	3773830	3801993	DFFB	+	0.918879	87.1013	4.90026	92.0015	1.1	1.4	32717	0.983204	65.0949	1.43549	66.5304	3.5	2.3	130630
Chr1	3805696	3816857	C1orf174	-	3.62735	88.1051	4.19661	92.3017	1.5	1.1	26356	4.29154	78.5006	0.789947	79.2906	3.2	1.5	70187
Chr1	3816967	3832011	LINC01134	+	0.184637	72.0472	3.85256	75.8997	1.1	1.5	131967	0.229525	52.7588	0.766603	53.5254	3.2	1.7	124403
Chr1	4000671	4012643	LINC01346	+	0	14.1941	61.2138	75.4079	0.9	0.9	4975	0.00647036	-3.29834	14.6106	11.3122	0.9	0.4	19470
Chr1	4472110	4484744	LOC284661	+	0	-5.22267	75.0406	69.8179	0	0.1	5547	0.00647036	-11.5695	21.2097	9.6402	0.1	0.1	11951
Chr1	4715104	4843851	AJAP1	+	0.144236	69.9781	4.8117	74.7898	1.5	4.3	56914	0.163563	-78.7964	87.0628	8.26645	0.1	0.1	175799
Chr1	5624130	5624203	MIR4417	+	0	NA	77.1985	NA	0	0.1	73	0.00647036	NA	6.16	NA	0.1	0.1	219
Chr1	5922731	5922801	MIR4689	-	0	NA	91.3718	NA	0	2.1	51	0.00647036	NA	82.572	NA	0.1	0.1	402
Chr1	6052357	6161253	KCNAB2	+	0.421888	71.1038	4.21926	75.323	1.2	2	105331	1.76102	42.6017	0.818482	43.4202	4.1	2.2	271625
Chr1	5922867	6052533	NPHP4	-	0.144621	86.4221	4.15295	90.5751	1.7	1.5	68836	0.505229	73.9853	0.883306	74.8686	4.2	2.2	257667
Chr1	6161846	6240194	CHD5	-	0.0404371	61.6166	8.64423	70.2608	1.7	1.5	32039	0.0917012	-3.85707	35.8105	31.9534	0.1	0.1	290702
Chr1	6245079	6259679	RPL22	-	49.0625	84.8584	5.53988	90.3983	0.7	2	31119	85.751	42.3693	7.7135	50.0828	2.7	2.2	84458
Chr1	6266188	6281359	RNF207	+	0.782048	72.6783	6.75415	79.4324	1.5	1	14209	1.15501	74.9075	0.394346	75.3019	3.9	1.9	137993
Chr1	6281252	6296044	ICMT	-	3.54989	68.3099	23.3542	91.6641	0.6	1.3	17910	5.42469	29.5746	16.9873	46.5619	2.5	1.9	109829
Chr1	6296299	6299502	LINC00337	+	0.325696	60.6423	28.4065	89.0488	1.4	0.5	2230	0.226625	15.2224	23.8812	39.1036	2.6	0.5	25480
Chr1	6304251	6305638	HES3	+	0	-11.931	14.7732	2.84218	0.6	3.4	807	0.00647036	-34.1836	34.3066	0.122973	0.1	0.1	1468
Chr1	6307405	6321035	GPR153	-	0.286623	49.8696	5.08208	54.9516	1.2	2.2	15642	1.20766	31.3538	2.74333	34.0971	6.4	2	54709
Chr1	6324331	6453826	ACOT7	-	2.17987	83.49	6.0034	89.4934	0.9	1.7	244329	4.90172	47.0634	2.78874	49.8522	3	2.1	1284976
Chr1	6475293	6479979	HES2	-	0.195754	58.6496	6.21406	64.8636	1.1	1.7	5771	0.377433	19.2672	2.64472	21.9119	3.1	2.1	13622
Chr1	6484847	6521004	ESPN	+	3.82537	41.5069	9.83537	51.3423	1.7	1	138858	0.264768	18.6611	20.1451	38.8062	2.2	0.1	80910
Chr1	6489893	6489956	MIR4252	-	0	NA	63.9156	NA	0.7	0.5	63	0.00647036	NA	23.0459	NA	0.5	0.1	126
Chr1	6521213	6526255	TNFRSF25	-	0.573464	31.1622	51.5758	82.738	0.3	2.5	11102	0.13302	-1.02599	66.6033	65.5773	0.1	0.1	13373
Chr1	6526151	6580121	PLEKHG5	-	0.271381	1.18025	63.6207	64.801	0.8	0.6	68711	0.317124	-10.5032	46.5025	35.9993	0.1	0.1	229963
Chr1	6581406	6614658	NOL9	-	2.45607	76.3269	13.5599	89.8868	0.6	1.6	58663	2.06475	71.5984	2.96391	74.5623	2.8	1.7	77734
Chr1	6615337	6639817	TAS1R1	+	0.0487959	54.791	28.937	83.728	0	0.1	36017	0.0924783	25.8778	18.1886	44.0664	2.7	0.5	62154
Chr1	6640050	6649340	ZBTB48	+	1.5587	61.6948	16.3244	78.0192	0.6	1.4	94142	1.55629	13.7677	13.3444	27.1121	3.8	3.3	104597
Chr1	6650783	6662929	KLHL21	-	1.97938	65.2325	2.21018	67.4426	1.8	3	200906	2.25361	34.7763	0.29007	35.0664	7.1	4.5	253728
Chr1	6673755	6684093	PHF13	+	0.529444	50.0094	5.8782	55.8876	1.4	2.4	66482	1.22682	31.8219	2.27392	34.0958	4.5	2.7	65867
Chr1	6684924	6695646	THAP3	+	1.51095	68.2998	17.2578	85.5577	0.3	1.5	37128	2.58056	47.9409	11.4917	59.4325	2	1.7	52679
Chr1	6694227	6761966	DNAJC11	-	3.72465	79.1283	12.6847	91.813	0.5	1.5	63831	2.78297	68.072	8.6777	76.7497	1.8	1.4	131801
Chr1	6784804	6790072	LOC100505887	+	0	2.61359	79.3461	81.9597	1	0.4	2985	0.00647036	4.89505	35.7079	40.6029	1.6	0.6	9031
Chr1	6845383	7829766	CAMTA1	+	3.30689	76.1068	2.57826	78.6851	1.7	1.4	1276929	1.83208	26.4569	0.567194	27.0241	3.2	1.4	1787415
Chr1	7831328	7841492	VAMP3	+	9.54162	82.8414	6.74991	89.5913	0.7	1.3	38765	9.77896	67.9705	5.00165	72.9721	1.9	1.3	25902
Chr1	7844488	7905240	PER3	+	9.38354	80.3274	10.761	91.0884	1.5	1.3	73209	0.667647	44.8243	17.682	62.5063	3.2	0.5	64603
Chr1	7907671	7913551	UTS2	-	0.0973298	12.6808	77.3928	90.0736	1.5	1.6	2334	0.447331	13.8491	39.18	53.0291	3.2	1.5	6264
Chr1	7975930	8003225	TNFRSF9	-	0.253362	45.9983	32.3469	78.3453	0	1.7	29411	0.339253	30.0164	7.82854	37.8449	4.8	3.8	33339
Chr1	8021713	8045342	PARK7	+	72.1882	82.0483	4.22104	86.2693	1.1	1.2	115040	93.3037	57.9005	1.17112	59.0716	2.4	1.5	72180
Chr1	8071778	8086393	ERRFI1	-	45.0884	49.4184	3.75363	53.172	1	1.5	206009	34.3175	2.28781	0.758715	3.04653	4.9	2.1	112365
Chr1	8378144	8404227	SLC45A1	+	0.0806133	57.1353	31.8893	89.0246	0.4	1	18756	0.115663	40.0963	22.0644	62.1607	1	0.8	97733
Chr1	8412463	8877699	RERE	-	2.49641	79.7915	2.97319	82.7647	1.2	2.7	1767683	1.03139	60.7384	0.415906	61.1543	5.1	3.4	1271207
Chr1	8926560	8926649	MIR6728	-	0	NA	92.5718	NA	0	0.1	552	0.00647036	NA	13.1223	NA	0.8	0.6	1319
Chr1	8938893	8939943	ENO1-AS1	+	0.132649	NA	2.08864	NA	1.7	2.1	101738	0.00647036	NA	0.527333	NA	7.6	3.1	59999
Chr1	8921058	8939151	ENO1	-	65.9367	66.4025	2.11609	68.5186	1.8	2	332675	364.972	8.80981	0.594032	9.40384	7.6	4.9	365214
Chr1	9005892	9035148	CA6	+	0	-6.76083	93.1412	86.3804	0	0.1	12171	0.00647036	14.8371	26.4604	41.2974	1.4	0.9	51374
Chr1	9063358	9086404	SLC2A7	-	0	-7.34987	90.809	83.4592	0	0.1	8951	0.00647036	28.1272	16.9705	45.0978	1.7	0.2	48863
Chr1	9097004	9129887	SLC2A5	-	0	7.78838	72.0802	79.8685	1.3	1.2	15853	0.202823	32.1718	18.3304	50.5021	2.1	1.1	67548
Chr1	9164475	9189229	GPR157	-	0.387951	79.5768	6.72433	86.3012	1.3	1.6	143081	0.491385	48.3917	0.646393	49.038	3.4	2.2	115921
Chr1	9211726	9211836	MIR34A	-	2.20992	NA	85.7173	NA	1.4	0.9	110	0.00647036	NA	76.2208	NA	0.1	0.1	53
Chr1	9294862	9331394	H6PD	+	9.79571	68.6496	5.96787	74.6175	1.9	1	613252	1.01111	46.4874	0.204677	46.692	4.2	2.5	218660
Chr1	9352940	9429590	SPSB1	+	0.97746	85.2502	5.25638	90.5065	0.9	1.5	98386	3.49727	42.2729	1.3244	43.5973	5	3.6	756453
Chr1	9485152	9489055	LOC100506022	-	0.18942	37.8429	36.394	74.2369	0.8	0.7	20382	0.269302	32.2596	9.10986	41.3695	2.2	1.3	16187
Chr1	9599527	9642831	SLC25A33	+	3.01024	74.0369	10.6603	84.6972	0.6	1.5	162214	4.43785	55.2027	6.08371	61.2864	2.8	2.3	172591
Chr1	9648931	9674935	TMEM201	+	0.190619	78.4708	13.698	92.1688	0.7	1.4	25197	0.550292	66.2836	8.97217	75.2557	2.9	2.1	65208
Chr1	9711789	9789172	PIK3CD	+	0.53482	66.842	7.40089	74.2429	0.6	2.2	98602	0.3641	-10.2416	51.4039	41.1623	0.1	0.1	159112
Chr1	9712667	9714644	C1orf200	-	0.0727895	-50.745	70.0634	19.3184	0	0.1	22382	0.00647036	19.8909	35.3035	55.1945	0.1	0.1	1359
Chr1	9789078	9884550	CLSTN1	-	2.04861	81.9524	7.32266	89.2751	1.8	2.2	83985	2.7571	60.1356	4.60325	64.7388	4.8	2.8	307162
Chr1	9908333	9970316	CTNNBIP1	-	2.47611	82.488	5.08452	87.5725	1.1	1.4	81358	1.62169	46.6901	2.9323	49.6225	2.6	1.5	124247
Chr1	9989775	10002826	LZIC	-	8.63053	74.8437	17.7831	92.6268	1.5	0.7	11864	4.11078	56.438	13.0534	69.4915	2.2	0.8	25793
Chr1	10003485	10045556	NMNAT1	+	2.08768	77.0008	16.1723	93.1731	1.2	0.9	44849	1.67332	59.399	11.6711	71.0702	2.2	0.9	90092
Chr1	10057254	10076078	RBP7	+	2.17936	75.3811	12.6082	87.9893	0.8	1.3	7537	0.00647036	-21.3956	63.5701	42.1745	0.9	0.2	28488
Chr1	10093040	10241296	UBE4B	+	3.02949	79.3895	14.3157	93.7052	0.9	2	227065	1.33942	75.2554	0.836976	76.0924	3.9	2.9	360781
Chr1	10270763	10441661	KIF1B	+	7.76562	88.6551	3.54146	92.1965	1.3	1.5	323606	3.54014	66.1003	1.2102	67.3105	4.5	3.1	417419
Chr1	10459084	10480201	PGD	+	14.4366	85.5073	5.53399	91.0412	0.9	2	95715	117.321	5.89584	0.351182	6.24703	7.4	5.1	770443
Chr1	10490158	10502872	APITD1	+	2.11682	74.3692	8.97892	83.3481	0.4	1.6	15909	10.8903	39.1789	2.82662	42.0056	2.5	1.8	62711
Chr1	10490158	10512060	APITD1-CORT	+	0.106112	75.2109	8.97892	84.1898	0.4	1.6	19716	0.601333	48.7436	2.82662	51.5702	2.5	1.8	80282
Chr1	10509775	10512060	CORT	+	0.195386	-52.1322	89.0753	36.9431	0	0.1	1814	0.22867	-65.6596	74.2259	8.56633	0.1	0.1	4521
Chr1	10520602	10532613	DFFA	-	4.63336	78.1235	14.5483	92.6719	0.7	1.1	16425	5.62779	64.6669	12.2506	76.9175	2.2	1.6	54845
Chr1	10535002	10690815	PEX14	+	2.72994	58.2727	25.8694	84.1421	0.3	2.7	431996	0.66275	41.3301	18.387	59.7172	3.1	2.8	367860
Chr1	10696665	10856733	CASZ1	-	0.209846	68.7216	6.68914	75.4107	0.5	5.1	402174	0.298385	41.4498	4.31987	45.7697	5.6	5.1	623229
Chr1	11006529	11042094	C1orf127	-	0.0443156	-8.28479	87.7279	79.4431	0	0.1	36129	0.00647036	6.78487	25.914	32.6989	4.1	2.6	83533
Chr1	11072678	11085549	TARDBP	+	11.8911	82.4902	8.05211	90.5423	0.9	1.3	45231	10.9368	67.2845	7.32765	74.6122	1.9	1.2	39461
Chr1	11086579	11107296	MASP2	-	27.7093	32.442	46.1766	78.6186	0.4	2.1	111544	0.00647036	-3.88067	45.5788	41.6981	0.6	0.2	29967
Chr1	11114648	11120091	SRM	-	1.40329	84.5774	3.8539	88.4313	1.7	1.3	12139	2.28323	44.9844	0.765113	45.7495	4	1.8	27116
Chr1	11126675	11159938	EXOSC10	-	6.26044	73.2953	18.1879	91.4832	0.6	1.3	25287	5.49977	68.9313	6.87883	75.8101	2.5	1.7	65647
Chr1	11203954	11209595	MTOR-AS1	+	0.142799	3.92964	89.7757	93.7054	0.1	1.8	6053	0.291488	-3.34299	79.2684	75.9254	2.7	1.5	7586
Chr1	11249345	11256038	ANGPTL7	+	0.164312	11.0698	84.5292	95.599	1.6	0.3	5941	0.122102	16.2073	71.7961	88.0034	4.7	0.6	9064
Chr1	11166587	11322608	MTOR	-	4.38897	83.9925	6.88121	90.8737	1.1	1.1	307764	3.33966	75.4718	1.35518	76.827	4.2	1	254015
Chr1	11333254	11348491	UBIAD1	+	0.917533	76.4278	16.3372	92.7649	0.7	1.2	57158	0.823799	52.279	15.1272	67.4061	3	2.4	59510
Chr1	11539294	11597640	PTCHD2	+	0	68.4888	3.18666	71.6754	1	1.3	24875	0.00647036	-49.2274	65.7472	16.5198	0.1	0.1	84698
Chr1	11669587	11673411	LOC101929181	+	0.649285	-11.8564	83.9557	72.0993	0.4	0.4	2388	0.342204	-31.5779	34.8508	3.27289	0.1	0.1	4922
Chr1	11714431	11723384	FBXO44	+	1.55644	75.1481	16.425	91.573	0.4	1.4	6400	0.896192	31.0681	30.3274	61.3955	1.6	1.6	20545
Chr1	11708417	11714888	FBXO2	-	1.56062	19.6565	15.5018	35.1583	0.8	0.9	53134	0.55212	-21.6364	28.9135	7.27716	1.6	0.5	41431
Chr1	11724149	11734409	FBXO6	+	1.56582	69.8713	15.3166	85.1879	0.4	1.3	42436	1.90856	37.0217	10.0747	47.0965	2	1.6	30270
Chr1	11734536	11751678	MAD2L2	-	2.0778	49.7285	6.91573	56.6442	2.6	2	67859	5.24581	3.45081	27.2105	30.6613	1	0.8	46020
Chr1	11751780	11780336	DRAXIN	+	0	63.3971	7.23602	70.6331	2	2.6	22487	0.00647036	2.31949	25.6796	27.9991	1	0.2	63048
Chr1	11796141	11810828	AGTRAP	+	0.382002	82.1029	9.24231	91.3452	0.5	1.6	79403	1.82448	60.9306	3.32241	64.253	2.7	1.8	62706
Chr1	11822249	11849642	C1orf167	+	0	41.8217	34.1047	75.9263	0.5	0.8	72278	0.00647036	2.52442	27.7889	30.3134	0.8	0.4	67494
Chr1	11866152	11903201	CLCN6	+	0.572095	82.5121	1.8051	84.3172	3.4	1.6	316566	0.488855	67.2879	0.49867	67.7866	6.8	1.8	105064
Chr1	11845786	11866160	MTHFR	-	1.07256	74.9301	1.7517	76.6818	1.5	3.5	377639	0.753155	36.8253	0.501337	37.3267	6.8	5.1	179123
Chr1	11900375	11907673	NPPA-AS1	+	0.242659	23.3259	49.2214	72.5474	1.7	3.2	148094	0.0548242	-13.6312	50.4602	36.829	0.1	0.1	14023
Chr1	11905766	11907840	NPPA	-	0	6.21103	89.0061	95.2171	0	0.1	3304	0.00647036	44.6536	21.3605	66.0141	2	0.7	2276
Chr1	11917520	11918992	NPPB	-	0	28.1439	23.9723	52.1163	1.1	0.6	299	0.00647036	-26.0246	26.0246	0	0.1	0.1	1733
Chr1	11979644	11986485	KIAA2013	-	5.86571	49.4194	18.1987	67.6181	0.5	2.6	24360	5.98173	47.0668	3.78776	50.8546	2.9	2.1	24092
Chr1	11994723	12035599	PLOD1	+	11.5801	69.8493	19.3837	89.2329	0.6	1.4	106594	16.3621	53.4158	4.92126	58.3371	3.8	3.1	211524
Chr1	12040237	12073572	MFN2	+	11.9685	71.9703	13.3749	85.3452	0.9	1.3	395407	5.51433	59.1727	1.29701	60.4697	3.3	1.5	108100
Chr1	12079298	12092106	MIIP	+	0.818442	70.0226	23.3084	93.331	0.4	1.4	28502	1.82529	54.6675	16.0881	70.7556	2.1	1.5	66187
Chr1	12089214	12089279	MIR6729	+	0	NA	96.0805	NA	0	0.1	0	0.00647036	NA	79.9509	NA	0.1	0.1	188
Chr1	12123433	12204264	TNFRSF8	+	0.0502287	73.6963	6.03247	79.7288	1	1.5	150259	0.0960681	-19.0556	49.8937	30.8381	0.1	0.1	175975
Chr1	12226999	12227095	MIR7846	+	0	NA	15.1213	NA	0.4	1.9	3382	0.00647036	NA	6.80672	NA	1.7	1.3	0
Chr1	12227059	12269277	TNFRSF1B	+	2.10692	60.6511	15.0779	75.729	0.4	1.9	537184	0.957591	31.8399	6.73865	38.5785	1.7	1.2	122743
Chr1	12251769	12251830	MIR4632	+	0	NA	91.6064	NA	0	0.1	437	0.00647036	NA	55.5746	NA	0.1	0.1	290
Chr1	12290112	12572098	VPS13D	+	6.34211	78.9933	9.50987	88.5031	0.5	1.9	881966	2.79075	57.2579	6.88972	64.1476	3.1	2.8	1532608
Chr1	12567299	12567451	SNORA59B	+	3.53715	NA	94.2808	NA	0	0.1	0	6.75983	NA	80.5645	NA	0.9	0.7	912
Chr1	12638984	12639051	MIR6730	-	0	-5.01242	90.7224	85.71	0.3	0.1	134	0.00647036	NA	81.9151	NA	0.1	0.1	156
Chr1	12627938	12677737	DHRS3	-	16.5269	66.3785	1.74955	68.128	2.6	3.3	1056845	18.5819	43.4962	0.151681	43.6479	6.7	3.7	991451
Chr1	12704565	12727097	AADACL4	+	0	-4.78124	87.0095	82.2282	0.4	0.9	14466	0.00647036	7.98037	21.0973	29.0777	1.7	0.9	44015
Chr1	12776117	12788726	AADACL3	+	0.0493513	-13.3737	88.527	75.1533	0	0.1	3822	0.0713538	-21.7669	29.2358	7.46894	0.1	0.1	16635
Chr1	12806133	12821102	C1orf158	+	0	6.33348	62.0208	68.3543	0.5	5.1	4577	0.00647036	5.71458	0	5.71458	6.5	5.1	14561
Chr1	12834990	12838048	PRAMEF12	+	0	-4.04424	81.4579	77.4137	0	0.1	1165	0.00647036	-2.82592	5.76	2.93408	0.1	0.1	6590
Chr1	12851545	12856777	PRAMEF1	+	0	1.04497	69.3275	70.3725	0	1.7	995	0.00647036	-0.732712	6.37933	5.64662	0.1	0.1	1495
Chr1	12884617	12891264	PRAMEF11	-	0	19.0194	52.341	71.3604	2.7	1.4	1990	0.00647036	-1.02361	3.06037	2.03676	7.4	5.1	2728
Chr1	12907229	12908235	LOC649330	-	0.503294	NA	75.4883	NA	0	0.1	142	1.21702	NA	26.34	NA	0.1	0.1	335
Chr1	12907260	12908578	HNRNPCL1	-	0.0355672	NA	73.8779	NA	0	0.1	275	0.0564962	NA	24.8491	NA	0.1	0.1	662
Chr1	12916940	12921764	PRAMEF2	+	0.0424256	-9.57167	78.2433	68.6717	0	0.1	2584	0.00647036	8.11141	5.915	14.0264	3.5	1	3953
Chr1	12939032	12946025	PRAMEF4	-	0	14.7243	59.4217	74.146	3.1	1.1	1393	0.00647036	2.7464	2.06269	4.80909	5.9	2.2	335
Chr1	12976466	12980300	PRAMEF7	+	0	15.9658	62.8925	78.8583	2.7	1.3	385	0.00647036	0.91874	1.21917	2.13791	4.2	3.1	217
Chr1	12998504	13002353	PRAMEF9	-	0	-9.61467	75.4381	65.8235	0	0.1	199	0.00647036	-2.64027	4.43792	1.79765	7	5.1	0
Chr1	12998301	13007406	PRAMEF6	-	0	12.1883	54.4837	66.672	2.3	3.5	398	0.00647036	3.24556	1.62269	4.86825	5.2	0.8	0
Chr1	13035498	13039011	LOC391003	+	0.0436268	-5.23967	71.0906	65.8509	0	0.1	0	0.0645802	3.35922	0.464118	3.82333	5.8	3.7	0
Chr1	13035542	13038381	PRAMEF22	+	0.0359189	-4.75256	71.0906	66.338	0	0.1	0	0.00647036	3.63231	0.464118	4.09643	5.9	3.7	0
Chr1	13108513	13117751	PRAMEF5	-	0	12.2674	56.2073	68.4747	2.5	3.2	0	0.00647036	3.28199	2.38889	5.67088	4.8	0.7	0
Chr1	13161985	13167193	LOC645354	-	0.0467795	10.0243	64.2333	74.2576	3.4	0.9	0	0.00647036	3.44964	0	3.44964	5.5	1.6	335
Chr1	13182959	13184326	HNRNPCL2	-	0.209232	NA	77.0294	NA	0	0.1	398	0.71708	NA	8.67386	NA	0.1	0.1	873
Chr1	13194517	13199727	LOC649324	+	0.0454494	8.40266	66.8212	75.2238	1.7	0.8	0	0.00647036	1.77351	1.41	3.18351	5	0.7	0
Chr1	13328832	13331671	PRAMEF22	-	0.0359233	8.13575	63.5513	71.687	3	2.7	0	0.00647036	8.78	0	8.78	6.5	4	0
Chr1	13359818	13369057	PRAMEF5	+	0	16.6885	50.0332	66.7217	2.2	4	0	0.00647036	2.49043	1.93783	4.42826	5.1	0.9	0
Chr1	13359832	13368936	PRAMEF6	+	0	16.6885	50.0332	66.7217	2.2	3.9	0	0.00647036	2.49043	1.93783	4.42826	5	0.8	0
Chr1	13386914	13390748	PRAMEF7	-	0	29.0668	54.8883	83.9551	3.4	1.3	0	0.00647036	3.41914	4.16667	7.58581	7	2	0
Chr1	13409127	13414502	PRAMEF10	+	0.0394312	11.1052	68.9068	80.012	3.8	0.7	0	0.00647036	3.669	0.81	4.479	7.2	3.4	0
Chr1	13409134	13414502	LOC645382	+	0.0394977	11.1052	68.9068	80.012	3.8	0.7	0	0.00647036	3.669	0.81	4.479	7.2	3.4	0
Chr1	13421175	13428190	PRAMEF15	+	0	21.6151	50.6538	72.269	3.1	1.4	0	0.00647036	0.110023	1.96526	2.07529	4.6	0.2	0
Chr1	13447413	13452656	LOC400736	-	0	8.04266	60.5	68.5427	5	1.4	0	0.00647036	-3.30123	5.80917	2.50794	0.1	0.1	0
Chr1	13474052	13477569	PRAMEF19	-	0.0480944	-7.21306	73.1475	65.9344	0	0.1	0	0.0633278	-0.291778	4.97844	4.68667	5.5	5.1	0
Chr1	13495253	13498259	PRAMEF16	+	0.0368712	-16.3528	85.1092	68.7564	0	0.1	0	0.0728333	-19.2296	20.022	0.792353	0.1	0.1	0
Chr1	13495257	13498257	PRAMEF17	+	0.0368826	-16.3528	85.1092	68.7564	0	0.1	0	0.0733905	-19.2296	20.022	0.792353	0.1	0.1	0
Chr1	13516065	13526943	PRAMEF20	+	0	-0.0597237	75.0182	74.9585	0	0.1	0	0.00647036	0.820253	0.438333	1.25859	5.9	0.9	0
Chr1	13607699	13611533	PRAMEF7	-	0	29.1987	55.0731	84.2718	1.5	0.5	0	0.00647036	3.9423	4.16667	8.10897	5.6	2.4	0
Chr1	13629924	13635299	PRAMEF10	+	0.0394312	12.065	67.4985	79.5635	2.4	0.6	0	0.00647036	3.4763	0.81	4.2863	6.9	3.2	0
Chr1	13629931	13635299	LOC645382	+	0.0394977	12.065	67.4985	79.5635	2.4	0.6	0	0.00647036	3.4763	0.81	4.2863	6.9	3.2	0
Chr1	13641972	13648987	PRAMEF15	+	0	19.2975	50.928	70.2255	2.9	1.5	0	0.00647036	0.512121	1.62833	2.14045	5	0.6	0
Chr1	13668268	13673511	PRAMEF14	-	0	7.66296	60.3483	68.0112	0.6	1.6	0	0.00647036	-3.46434	6.04417	2.57983	0.1	0.1	0
Chr1	13328195	13698405	LOC391003	-	0.0436101	1.83899	72.1129	73.9518	0	5	1393	0.064544	6.72427	8.55646	15.2807	5.4	5.1	2010
Chr1	13694888	13698405	PRAMEF19	-	0.051642	-8.26193	72.1129	63.8509	0	5	0	0.0645689	-4.20614	8.55646	4.35032	5.4	5.1	0
Chr1	13716091	13719089	PRAMEF17	+	0.0496412	-13.3327	83.0104	69.6777	0	0.1	0	0.10786	-27.574	28.2671	0.693158	0.1	0.1	0
Chr1	13736906	13747803	PRAMEF20	+	0	-0.820373	75.151	74.3307	0	0.1	0	0.00647036	0.573878	0.452308	1.02619	3.6	3	0
Chr1	13801444	13840242	LRRC38	-	0.0418685	65.9387	5.10733	71.046	1	1.5	12313	0.0955987	-29.7367	37.0146	7.27786	0.1	0.1	51943
Chr1	13910251	13944452	PDPN	+	0.144851	65.858	10.2519	76.1099	0.9	1.3	12625	0.147064	-2.7831	10.9359	8.15275	0.1	0.1	43449
Chr1	14026734	14151574	PRDM2	+	4.02656	60.3088	20.82	81.1288	0.6	1.1	220963	1.74082	-19.0557	63.4328	44.3772	0.1	0.1	160909
Chr1	14925212	15444544	KAZN	+	0.52993	71.7217	4.49388	76.2155	1.1	2.1	619712	0.609873	-30.2727	52.2882	22.0155	0.1	0.1	817474
Chr1	15438310	15478960	TMEM51-AS1	-	0.229803	71.1535	5.85959	77.0131	2.7	0.6	35255	0.175021	23.4252	2.50422	25.9295	3.2	0.4	76551
Chr1	15479027	15546974	TMEM51	+	0.299871	59.47	5.79224	65.2623	0.6	2.7	303689	1.97323	34.0809	2.48877	36.5696	3.2	2.8	358078
Chr1	15490691	15498120	C1orf195	-	0.131009	15.3742	67.5918	82.9659	3.6	0.5	12580	0.311797	1.42597	67.3227	68.7487	0.1	0.1	10835
Chr1	15573767	15724622	FHAD1	+	0.117981	58.5764	22.8499	81.4263	1.8	0.9	180071	1.13083	-22.1675	62.0094	39.8419	0.1	0.1	890431
Chr1	15736390	15756839	EFHD2	+	3.54223	76.5995	7.48517	84.0847	0.9	1.3	131392	20.8956	13.3228	2.84381	16.1666	5.1	4.3	413436
Chr1	15764937	15773153	CTRC	+	0	-1.19916	86.8891	85.6899	0.3	0.7	2985	0.151071	17.4222	35.0501	52.4724	1.6	0.8	21353
Chr1	15783222	15798586	CELA2A	+	0	1.05445	86.6498	87.7042	0	0.1	3970	0.00647036	-11.2849	55.1851	43.9002	0.1	0.1	27340
Chr1	15802595	15817895	CELA2B	+	0	-6.23471	94.1328	87.898	0	0.1	4975	0.00647036	10.6108	44.3949	55.0057	0.1	0.1	20699
Chr1	15817895	15851285	CASP9	-	0.891967	90.6386	2.06233	92.7009	3.1	1.4	57079	1.44153	60.6938	1.37696	62.0708	4.8	1.6	69387
Chr1	15853307	15898228	DNAJC16	+	4.30713	88.6461	2.92154	91.5677	3.3	1.2	72222	1.31014	67.9849	0.11549	68.1004	4.8	1.3	102529
Chr1	15898193	15911605	AGMAT	-	14.1495	67.0388	18.2882	85.3269	0.6	2.3	53188	1.23278	56.4396	10.6401	67.0798	3	2.4	29668
Chr1	15943952	15987552	DDI2	+	13.5762	81.7891	2.33011	84.1192	0.7	2.4	185254	2.13494	60.4356	2.04718	62.4828	4.4	3.7	126556
Chr1	15986363	15988217	RSC1A1	+	6.64762	3.24511	87.5689	90.814	0.2	3.9	3100	1.33819	9.88875	83.4137	93.3025	0.1	0.1	2762
Chr1	16010826	16061264	PLEKHM2	+	1.4571	83.6549	7.13239	90.7873	0.7	1.7	122493	2.16356	70.2673	3.9369	74.2042	2.8	2.1	124905
Chr1	16062808	16067884	SLC25A34	+	0.540784	44.5003	32.6589	77.1592	1.7	1.7	20037	0.285513	22.9562	16.1893	39.1455	3.7	1.9	17227
Chr1	16068986	16074292	TMEM82	+	1.51605	45.1322	41.1405	86.2726	1.4	1	13713	0.00647036	5.20483	37.2931	42.4979	2	0.6	10666
Chr1	16085254	16113084	FBLIM1	+	1.5095	70.2876	17.2748	87.5623	1.3	1.1	35672	3.20332	53.5755	0.267862	53.8434	6.4	3.3	168536
Chr1	16133656	16134194	UQCRHL	-	5.8831	NA	93.4496	NA	0	0.1	387	8.34811	NA	64.723	NA	0.1	0.1	1123
Chr1	16174358	16266950	SPEN	+	6.51432	85.4059	0.988206	86.3941	1.2	3.4	420121	2.87122	55.9811	0.842727	56.8238	6.4	5.1	411662
Chr1	16160709	16174642	FLJ37453	-	0.645061	36.6949	0.795093	37.49	3	1.5	348537	0.743493	31.1803	0.812608	31.9929	6.4	1.7	211934
Chr1	16268363	16302627	ZBTB17	-	1.23647	76.6122	11.7968	88.409	0.5	1.4	78135	2.62145	52.6807	7.17809	59.8588	2	1.3	133127
Chr1	16330730	16333184	C1orf64	+	0.171107	-1.03796	86.4805	85.4425	0.4	0.3	1614	0.00647036	-40.6	54.0464	13.4463	0.1	0.1	3881
Chr1	16340522	16345285	HSPB7	-	0.122788	7.38144	74.8374	82.2189	0	1.5	21028	0.100651	17.9304	17.1696	35.1001	1.2	0.1	28793
Chr1	16348485	16360545	CLCNKA	+	0.0574289	-25.2808	87.7597	62.4789	0	0.1	19614	0.00647036	9.59136	16.4997	26.0911	2.8	1.9	40987
Chr1	16370230	16383821	CLCNKB	+	0	-11.9886	80.2622	68.2736	0	0.1	5113	0.00647036	7.54252	18.1939	25.7364	2.9	0.4	29426
Chr1	16384263	16400127	FAM131C	-	0	67.3405	11.5483	78.8888	0.7	1.2	47568	0.00647036	24.5144	5.21711	29.7315	1.8	1.2	32154
Chr1	16450831	16482582	EPHA2	-	1.87643	64.6119	7.09449	71.7064	0.7	2.7	298473	4.6192	30.4031	1.6767	32.0798	6.2	4.1	699367
Chr1	16524598	16539104	ARHGEF19	-	0.100586	-10.0111	66.995	56.9839	1	0.6	48870	0.716542	15.7619	15.9141	31.676	2.8	0.7	84866
Chr1	16558181	16563659	RSG1	-	0.440275	79.2083	14.7281	93.9365	0.8	1.2	15390	0.788029	67.1225	1.1859	68.3084	2.4	1.3	23440
Chr1	16576558	16678948	FBXO42	-	1.47249	87.4432	4.79828	92.2415	0.8	1.8	141185	1.81402	67.206	0.691917	67.8979	4.5	3.6	245628
Chr1	16693524	16724643	SZRD1	+	4.16571	62.3988	22.4319	84.8307	0.4	2	148077	8.31471	31.8048	19.1364	50.9411	3.4	3.1	207443
Chr1	16725137	16763919	SPATA21	-	0	0.31366	87.5877	87.9014	0	0.1	23817	0.00647036	11.8418	30.2174	42.0593	1.8	1.8	74310
Chr1	16767166	16786584	NECAP2	+	7.06122	73.0511	16.4802	89.5313	0.4	1.3	39697	6.9536	56.1888	11.3947	67.5835	1.6	1.2	76920
Chr1	16793930	16819196	CROCCP3	-	0.513549	0.0711849	92.5576	92.6288	0	0.1	8694	0.508053	12.9809	62.6986	75.6796	0.1	0.1	32258
Chr1	16875408	16875482	MIR3675	+	0	NA	52.5644	NA	1.4	0.1	0	0.00647036	NA	65.9416	NA	3.8	3.8	0
Chr1	16888921	16940100	NBPF1	-	5.62779	77.0803	4.37784	81.4581	1	1.4	212847	5.92406	52.0203	1.17147	53.1917	3.9	2.7	151368
Chr1	16944750	16957401	CROCCP2	-	4.21653	-9.14989	93.0969	83.947	0	0.1	70074	1.99589	-32.1294	89.7131	57.5837	0.1	0.1	109844
Chr1	16972068	16976915	MST1P2	+	7.72369	40.8259	21.0286	61.8545	2	0.6	46065	0.341564	60.2629	16.7909	77.0539	2.7	0.5	4792
Chr1	16999497	17000007	FAM231A	+	0.143228	NA	89.7922	NA	0	0.1	0	0.325279	NA	54.9627	NA	5.1	0.1	0
Chr1	17007749	17007823	MIR3675	+	0	NA	57.8392	NA	0	0.1	0	0.00647036	NA	63.5059	NA	0.1	0.1	0
Chr1	17017712	17046652	ESPNP	-	0.415096	-37.1482	89.2594	52.1112	0	0.1	219774	0.105269	17.3397	34.6128	51.9525	0.1	0.1	170804
Chr1	17060446	17060956	FAM231A	-	0.143228	NA	89.2837	NA	0	0.1	0	0.325279	NA	53.2524	NA	5.2	0.2	0
Chr1	17081128	17090975	MST1L	-	5.98173	19.1204	44.2549	63.3753	3.6	0.2	29397	0.298937	67.2442	4.66533	71.9095	5.2	0.7	23004
Chr1	17185443	17185516	MIR3675	-	0	NA	48.9125	NA	1.5	0.2	0	0.00647036	NA	70.7629	NA	0.1	0.1	40
Chr1	17248444	17299474	CROCC	+	0.283416	13.8114	70.9759	84.7873	0.7	0.7	54992	0.784174	-6.22508	62.8363	56.6112	0.1	0.1	185327
Chr1	17300998	17308081	MFAP2	-	0.101361	13.4579	48.365	61.8229	0	0.1	8064	0.132497	9.46864	28.638	38.1066	6.9	3.7	16106
Chr1	17312452	17338467	ATP13A2	-	0.339927	81.9014	10.4686	92.37	1	2.6	18414	0.56596	66.7435	2.05333	68.7968	3.6	2.7	63370
Chr1	17345224	17380665	SDHB	-	45.7358	67.1776	21.3247	88.5023	0.6	2.6	88741	30.9284	54.4682	15.3247	69.7929	2.8	2.3	91814
Chr1	17393255	17445948	PADI2	-	0.0473177	64.4127	18.1046	82.5173	0.6	1.4	51826	0.156524	-20.573	39.3129	18.7398	0.1	0.1	102928
Chr1	17531620	17572501	PADI1	+	0	-5.40919	78.872	73.4628	0.6	0.8	33984	0.184495	-12.9509	37.8256	24.8746	0.9	0.4	183094
Chr1	17575592	17610727	PADI3	+	0	-2.31299	77.0701	74.7571	0.7	0.2	23675	0.00647036	-28.9142	47.8193	18.9051	0.1	0.1	60786
Chr1	17634689	17690495	PADI4	+	0.0609472	14.3661	57.1168	71.4829	0.3	2.6	37640	0.00647036	17.8375	6.8661	24.7036	3.3	2.4	86041
Chr1	17698690	17728195	PADI6	+	0.0463176	11.6124	69.5277	81.1401	2.7	1.4	15539	0.00647036	5.4862	14.457	19.9432	2.9	0.5	51966
Chr1	17733250	17766250	RCC2	-	1.91609	62.789	8.36128	71.1503	0.6	3.1	85885	6.81344	41.099	3.42613	44.5251	4.1	3.2	147851
Chr1	17866329	18024370	ARHGEF10L	+	9.78518	73.8396	5.77073	79.6103	1.8	1.5	1026854	2.06436	51.2891	4.96776	56.2569	1.9	1.5	1113766
Chr1	18081807	18153558	ACTL8	+	0	0.516084	74.6854	75.2015	1.1	0.7	38041	0.878634	-13.6303	32.0416	18.4113	0.1	0.1	97397
Chr1	18434239	18704977	IGSF21	+	0.121687	62.2834	4.69237	66.9758	1	4	144474	0.00647036	-47.4372	56.6025	9.16532	0.1	0.1	357497
Chr1	18807423	18812480	KLHDC7A	+	1.01809	57.107	35.7985	92.9056	1.2	1.1	13316	0.219026	57.4262	16.7718	74.198	2.1	1.2	20328
Chr1	18957499	19075360	PAX7	+	0.0396058	39.4367	4.13052	43.5672	1.4	5.1	41643	0.00647036	-41.4847	56.5975	15.1128	0.1	0.1	359280
Chr1	19166092	19186155	TAS1R2	-	0	-8.38872	85.8496	77.4608	0	2.8	11859	0.00647036	8.856	16.664	25.52	0.1	0.1	31890
Chr1	19209695	19209769	MIR4695	-	0	NA	80.4956	NA	0	0.1	277	0.00647036	NA	41.4474	NA	0.1	0.1	442
Chr1	19197923	19229293	ALDH4A1	-	26.4754	77.2424	3.55473	80.7972	1.1	3.4	203817	1.30596	53.9216	0.632791	54.5544	5.2	3.2	88848
Chr1	19230773	19282826	IFFO2	-	1.14842	74.2652	1.75112	76.0164	1.3	1.9	361613	1.24027	32.3037	0.862925	33.1666	5.5	4.4	287527
Chr1	19400999	19536746	UBR4	-	9.20471	83.9141	1.4927	85.4068	1.2	1.8	540505	3.20504	61.3267	0.377979	61.7047	4.5	2	386983
Chr1	19542157	19578053	EMC1	-	4.02946	89.2196	2.46532	91.6849	1.3	1	59350	2.11324	73.438	1.55897	74.997	3.1	1.1	77904
Chr1	19578074	19586622	MRTO4	+	2.88044	84.126	2.46532	86.5913	0.9	1.4	47380	11.9261	31.371	1.55897	32.93	3	2	109056
Chr1	19592475	19600568	AKR7L	-	4.57427	56.185	16.9398	73.1249	0.9	4.7	130926	0.596426	47.8543	1.04116	48.8954	2.7	1.6	83723
Chr1	19609056	19615280	AKR7A3	-	35.1417	70.7773	10.6518	81.4291	1.1	3.5	96886	1.75891	56.082	0.247961	56.3299	4.7	3.7	59994
Chr1	19619740	19622230	LOC100506730	-	1.16986	-5.70855	95.5235	89.815	0	0.1	1194	0.436675	-12.7742	65.7026	52.9283	4.7	4.6	3687
Chr1	19629201	19638640	AKR7A2	-	2.98297	91.4794	2.75044	94.2298	1.3	1.2	18327	1.70501	71.0265	2.96404	73.9905	3	1.6	27695
Chr1	19638739	19658922	PQLC2	+	0.694841	88.3792	2.97365	91.3529	1.2	1.3	51631	1.22256	67.8634	3.05046	70.9139	3	1.4	69351
Chr1	19665266	19812135	CAPZB	-	15.2367	77.5378	6.80602	84.3438	1	1.8	612293	13.9099	58.3574	2.40965	60.7671	3.4	2.2	540191
Chr1	19923470	19956315	MINOS1	+	1.31313	85.017	6.96928	91.9862	0.9	1.3	66465	1.85169	65.99	5.01789	71.0079	2.3	1.5	64622
Chr1	19923470	19984949	MINOS1-NBL1	+	0.68641	59.7404	6.96928	66.7097	0.9	1.3	103966	3.55958	35.8244	5.01789	40.8423	2.3	1.5	191109
Chr1	19934300	19935138	RPS14P3	+	0.549091	NA	78.0365	NA	1.6	0.6	656	0.983814	NA	70.7853	NA	0.1	0.1	1888
Chr1	19969722	19984949	NBL1	+	0.0883984	30.081	18.2859	48.3669	0	0.1	31230	5.91298	11.7637	7.83465	19.5983	4.4	4	77643
Chr1	19991779	20007459	HTR6	+	0.0604376	57.3803	13.5658	70.9461	0.9	1.3	7828	0.0741812	-20.0568	46.9975	26.9407	0.1	0.1	25683
Chr1	20008705	20126410	TMCO4	-	1.37713	76.7463	13.4776	90.2239	0.9	1.2	101831	1.76157	56.3088	1.42425	57.7331	3.2	1.5	297090
Chr1	20140521	20141771	RNF186	-	0.0913824	44	51.285	95.285	1.6	0.7	10301	0.00647036	17.9022	10.2228	28.125	2.3	0.9	9623
Chr1	20208887	20239437	OTUD3	+	0.674578	76.31	16.5263	92.8363	0.7	1.3	41139	1.92483	67.4692	7.53201	75.0012	2.9	1.9	49756
Chr1	20246799	20250110	PLA2G2E	-	0	17.1735	61.0855	78.259	0.9	1.9	1293	0.00647036	-6.03435	23.7336	17.6992	3.3	2.8	9842
Chr1	20301923	20306932	PLA2G2A	-	0.589585	7.24567	72.0593	79.305	2.2	1.1	55278	0.00647036	-1.81446	23.8371	22.0227	2.6	0.6	12552
Chr1	20396700	20418394	PLA2G5	+	0.282254	8.41104	71.8337	80.2447	1.1	1.1	33460	0.00647036	-17.3769	35.475	18.0981	0.1	0.1	37293
Chr1	20439142	20446059	PLA2G2D	-	0	0.420103	72.7447	73.1648	0.8	1.9	2214	0.00647036	12.3893	9.98067	22.3699	3.5	0.1	13507
Chr1	20465822	20476879	PLA2G2F	+	0	-2.46044	87.7146	85.2541	0	0.1	4776	0.00647036	-4.85061	28.7887	23.9381	0.1	0.1	21409
Chr1	20490483	20501687	PLA2G2C	-	0	-0.369603	82.2549	81.8853	0.7	0.6	13777	0.00647036	6.72293	24.0449	30.7678	1.5	0.9	21281
Chr1	20512577	20519942	UBXN10	+	1.13247	77.1069	10.6243	87.7312	0.6	1.6	16816	0.177462	21.9876	3.68935	25.6769	6.2	3.2	14496
Chr1	20510735	20512979	UBXN10-AS1	-	0.193684	55.578	5.36674	60.9448	1.1	1.1	20249	0.00647036	4.8162	2.44034	7.25654	6.2	3.5	9891
Chr1	20617411	20681387	VWA5B1	+	0.0381574	42.68	31.8021	74.4821	0.5	1.7	27462	0.0865087	26.8897	6.4463	33.336	4.1	1.9	121459
Chr1	20686293	20755287	LINC01141	-	0.220536	-17.7292	74.3917	56.6625	0	0.1	32437	0.226129	-8.35022	30.815	22.4648	0.1	0.1	93424
Chr1	20808883	20812728	CAMK2N1	-	12.1317	0.0585689	3.11221	3.17078	1.3	3.3	65688	5.37915	-0.16228	0.717509	0.555228	7.2	5.1	102435
Chr1	20825940	20834674	MUL1	-	3.75829	80.0002	11.8873	91.8875	0.5	1.1	19860	5.0351	68.7887	11.729	80.5178	1.6	1.1	24752
Chr1	20878931	20881513	FAM43B	+	0.0453239	6.68273	7.59987	14.2826	0.6	2.4	3941	0.00647036	9.81236	60.2408	70.0532	2.3	0.3	7421
Chr1	20915443	20945400	CDA	+	2.6978	69.6177	9.5065	79.1242	0.9	2.3	524973	0.294171	40.5598	2.61476	43.1745	3.7	2.2	217894
Chr1	20959947	20978004	PINK1	+	3.41236	77.776	8.35715	86.1331	0.6	1.8	71325	1.0992	49.956	2.12409	52.08	2.8	1.6	44050
Chr1	20960171	20960281	MIR6084	+	0	NA	6.75088	NA	0.8	1.6	8124	0.00647036	NA	1.91932	NA	2.8	1.4	323
Chr1	20969149	20978686	PINK1-AS	-	5.49119	-3.84393	93.0617	89.2178	0	0.1	12464	1.85727	-19.0092	83.3927	64.3835	0.1	0.1	16927
Chr1	20978259	20988037	DDOST	-	14.118	82.6249	4.0414	86.6663	0.8	1.5	21922	23.1794	68.9594	5.99	74.9494	2.3	1.6	44278
Chr1	20990506	21044510	KIF17	-	0.194441	55.6388	25.2718	80.9106	0.7	1	101817	0.221936	-37.7991	82.9307	45.1315	0.1	0.1	152023
Chr1	21046224	21059133	SH2D5	-	0.0418531	72.2092	5.77462	77.9838	1.2	1.6	6169	0.945538	55.4873	1.45471	56.942	4.7	3.1	41833
Chr1	21069170	21113181	HP1BP3	-	12.1729	89.6218	2.19862	91.8204	1.7	2	91072	16.5269	67.2024	2.18838	69.3908	5.2	3.3	105995
Chr1	21132784	21503381	EIF4G3	-	7.22276	82.4014	8.7495	91.1509	0.8	2.6	544828	8.67191	63.5327	7.12561	70.6583	3.8	3.1	748795
Chr1	21619782	21626362	LOC100506801	+	0.191676	3.95748	85.5388	89.4963	0	0.1	40107	0.128011	6.20684	44.1543	50.3612	1.2	0.4	56149
Chr1	21543739	21672034	ECE1	-	7.64872	76.0308	2.98783	79.0187	1.3	1.4	1367251	3.26292	50.2167	0.857022	51.0737	3.3	1.1	1183133
Chr1	21766582	21811393	NBPF3	+	1.07363	66.4785	13.7812	80.2597	0.7	1.2	29839	0.820971	21.4821	8.69328	30.1754	4.4	3.5	53406
Chr1	21835857	21904905	ALPL	+	4.74335	60.5295	17.3247	77.8542	0.8	1.2	344469	0.121303	-27.4754	58.8366	31.3612	0.1	0.1	192123
Chr1	21922707	21995856	RAP1GAP	-	0.714267	58.8441	9.19798	68.0421	1.1	1.2	156510	12.7282	24.9262	2.12807	27.0543	5.1	1.7	1001281
Chr1	22004791	22109688	USP48	-	6.22295	88.4069	2.93616	91.3431	1.1	1.7	133829	5.82456	66.8591	1.2208	68.0799	3.7	2.4	232671
Chr1	22138757	22151714	LDLRAD2	+	0.0413933	-20.6901	90.6788	69.9887	0	0.1	11940	0.0912707	24.4915	47.3887	71.8802	3.2	0.8	34017
Chr1	22148724	22263790	HSPG2	-	3.38346	67.8322	19.855	87.6872	0.7	1.7	217109	0.423274	46.0554	14.3167	60.3721	4.4	3.8	549364
Chr1	22303417	22315847	CELA3B	+	0	-9.53597	91.8387	82.3027	0	0.1	2422	0.00647036	-48.202	78.7276	30.5256	0.1	0.1	18264
Chr1	22328148	22339035	CELA3A	+	0	-3.7024	88.5213	84.8189	0	0.1	2786	0.00647036	-20.7476	51.4108	30.6631	0.1	0.1	12319
Chr1	22351683	22357717	LINC00339	+	1.14545	71.043	5.27482	76.3178	1.1	1.5	79012	1.37646	43.6803	0.225306	43.9056	3.6	1.9	74443
Chr1	22350486	22352541	LOC101928043	-	0.0375874	-4.28862	15.4325	11.1439	0.6	2.1	75522	0.0823862	-3.26811	3.60525	0.337143	3.7	2.7	87518
Chr1	22379119	22419436	CDC42	+	26.3653	69.5622	15.1935	84.7557	0.4	1.8	104347	62.7244	40.6468	9.96591	50.6127	3.3	2.8	121893
Chr1	22443797	22469519	WNT4	-	0.186322	74.8398	4.01564	78.8555	1.5	1.8	20620	0.280939	35.3216	1.22837	36.5499	3.8	2.3	47936
Chr1	22778343	22857650	ZBTB40	+	1.40384	66.1221	23.186	89.3081	0.4	1.8	122316	1.30269	64.8747	3.14796	68.0227	3.5	1.9	128688
Chr1	22890003	22930087	EPHA8	+	0	65.3283	6.8187	72.147	1.1	1.4	18905	0.00647036	-37.0474	58.3768	21.3294	0.1	0.1	65475
Chr1	22959750	22959859	MIR6127	-	1.07485	NA	77.4531	NA	0	0.1	84	0.00647036	NA	25.3527	NA	0.1	0.1	0
Chr1	22963117	22966175	C1QA	+	13.4149	15.6337	46.825	62.4587	1.2	1.4	5831	0.00647036	38.3029	1.26172	39.5646	4.6	2.2	3974
Chr1	22970117	22974603	C1QC	+	20.0584	12.1657	66.7196	78.8853	0	0.1	11513	0.0597289	18.8048	6.96302	25.7678	3	0.7	6804
Chr1	22979681	22988029	C1QB	+	32.5561	-1.32319	70.9789	69.6557	0	0.1	10941	0.00647036	1.98824	16.2939	18.2822	1	0.1	9078
Chr1	23037330	23241823	EPHB2	+	0.0746697	77.8868	3.62023	81.507	1	1.6	118803	0.299096	30.1649	1.19415	31.359	2.4	1.6	381016
Chr1	23046009	23046091	MIR4684	+	0	NA	89.7124	NA	0	0.1	0	0.00647036	NA	31.7344	NA	3.5	1.9	0
Chr1	23189651	23189719	MIR4253	-	0	NA	90.4037	NA	0	0.1	13	0.00647036	NA	23.4158	NA	0.1	0.1	0
Chr1	23279535	23291923	LACTBL1	-	0	-3.56154	51.9223	48.3608	0.1	1.8	3980	0.00647036	44.9255	8.67083	53.5963	6.3	1.3	22299
Chr1	23337326	23342343	C1orf234	-	0	-0.34362	88.1702	87.8266	0	0.1	1222	0.00647036	-4.30739	49.1886	44.8812	0.1	0.1	16663
Chr1	23345940	23410184	KDM1A	+	8.65711	86.1701	6.42652	92.5966	0.9	2	59121	20.4926	65.5307	1.12171	66.6524	3.8	2.5	119280
Chr1	23370797	23370865	MIR3115	+	0	NA	94.5032	NA	0	0.1	44	0.00647036	NA	65.99	NA	0.1	0.1	0
Chr1	23410515	23495351	LUZP1	-	1.89255	75.4333	13.1295	88.5628	0.9	2	145363	4.54337	37.0894	22.014	59.1033	3.9	3.7	290220
Chr1	23518387	23521222	HTR1D	-	0.118433	13.6099	79.4859	93.0958	2.6	0.4	1379	0.6387	42.9454	34.9229	77.8683	1.6	0.6	4331
Chr1	23607801	23612011	LINC01355	-	1.2425	-41.7282	94.9778	53.2496	0	0.1	27548	0.870782	-12.81	34.22	21.41	7	2.2	22655
Chr1	23636275	23670853	HNRNPR	-	24.1865	83.0698	2.91682	85.9866	1	3.6	101889	108.125	62.5606	1.09736	63.6579	6.2	5.1	79868
Chr1	23695463	23698330	C1orf213	+	4.24514	52.905	1.73028	54.6352	1.4	1.5	54106	0.790334	34.3957	0.0945992	34.4903	2.7	1.3	119303
Chr1	23685940	23696357	ZNF436	-	1.84979	46.5438	9.69702	56.2408	0.5	2.4	124079	1.94635	32.4214	7.6882	40.1096	2.7	2.4	155218
Chr1	23707554	23751261	TCEA3	-	54.2738	72.2468	9.25032	81.4971	0.7	3.4	230153	0.744537	35.3755	7.72896	43.1045	2.4	1.7	176354
Chr1	23755055	23810750	ASAP3	-	1.45119	74.3933	9.97137	84.3647	0.9	1.4	393200	0.806664	43.3553	5.1152	48.4705	2	1.3	120603
Chr1	23848421	23854911	LOC101928163	+	0.252292	-12.8949	94.2264	81.3315	0	0.1	15020	0.257548	-51.165	78.4578	27.2928	0.1	0.1	43444
Chr1	23832919	23857712	E2F2	-	0.111679	83.8816	5.153	89.0346	0.6	1.9	26611	0.396352	59.9365	0.444064	60.3806	5.7	3.6	120131
Chr1	23884420	23886285	ID3	-	1.20761	7.421	4.28694	11.7079	0.5	1.9	46922	6.07656	-0.223486	0.46543	0.241944	6.4	5.1	135592
Chr1	23953823	23967056	MDS2	+	0.104773	-17.7393	83.742	66.0027	0.4	0.8	17313	0.0729209	-16.2427	45.2078	28.9651	0.1	0.1	113450
Chr1	24018268	24022915	RPL11	+	170.297	38.2058	23.4979	61.7037	0.5	2.5	30754	280.093	-1.2532	14.3161	13.0629	4.2	3.7	38723
Chr1	24069855	24088549	TCEB3	+	8.63512	72.6187	2.67577	75.2945	0.9	2.4	74726	6.23209	53.4734	2.63436	56.1077	4	2.7	58777
Chr1	24086871	24104787	TCEB3-AS1	-	6.90129	66.2871	16.3812	82.6683	1.2	0.8	89187	3.83452	36.3112	14.6587	50.9699	2.8	0.6	63933
Chr1	24104875	24114722	PITHD1	+	6.4143	76.4278	15.5323	91.9601	0.8	1.2	24217	4.289	63.9433	13.9556	77.8988	2.9	2.3	22152
Chr1	24117645	24122029	LYPLA2	+	2.44721	52.5279	9.90248	62.4303	0.7	1.5	30862	3.89377	4.53949	0.168904	4.7084	6.9	5.1	104883
Chr1	24122088	24127294	GALE	-	6.16988	64.8444	3.42638	68.2708	1.5	1.5	109060	9.25619	20.3464	1.49761	21.844	3.7	2.1	180910
Chr1	24128366	24151949	HMGCL	-	26.1731	70.2251	14.3376	84.5628	0.7	1.7	161885	3.44661	50.8566	9.58477	60.4414	2.4	1.5	66317
Chr1	24171571	24194859	FUCA1	-	14.9376	86.6341	4.73291	91.367	1	1.2	22704	4.94449	72.7621	2.33741	75.0996	2.6	1.4	43206
Chr1	24200459	24239817	CNR2	-	0	-13.6241	84.2403	70.6162	0.6	0.2	28580	0.0993716	0.674108	45.4731	46.1472	1.4	0.4	72681
Chr1	24255559	24255637	MIR378F	+	0	NA	86.6788	NA	0	0.1	269	0.00647036	NA	61.2306	NA	0.1	0.1	143
Chr1	24286300	24289949	PNRC2	+	21.3264	39.2531	1.9565	41.2096	1.2	1.9	59506	23.9325	8.58514	0.483687	9.06882	4.8	2	52366
Chr1	24292936	24306953	SRSF10	-	17.3869	65.4862	16.7084	82.1946	0.4	1.9	66625	25.6414	51.1265	9.64776	60.7742	4.5	4	73871
Chr1	24382530	24438665	MYOM3	-	0.0638263	29.9735	56.0871	86.0606	1.3	0.5	32039	0.525201	17.3542	27.4548	44.809	1.3	0.6	520456
Chr1	24446260	24469775	IL22RA1	-	0.40887	43.8346	38.2268	82.0614	0.7	1.9	58786	0.347873	49.4245	1.25836	50.6828	3.3	1.8	122416
Chr1	24480646	24513765	IFNLR1	-	1.31974	69.3443	17.2697	86.614	1	1.3	112050	1.01958	39.5308	10.9529	50.4837	2.1	0.8	57800
Chr1	24526729	24538180	LOC284632	+	0.0600042	29.7903	48.8049	78.5952	2.6	0.1	10945	0.186112	15.4317	22.4715	37.9032	3.8	0.6	54691
Chr1	24645811	24690970	GRHL3	+	0	28.5714	48.4764	77.0479	0.7	1	56319	0.00647036	53.2162	1.86306	55.0792	3.1	1.4	92344
Chr1	24683488	24741587	STPG1	-	0.279331	30.541	50.1878	80.7288	0	0.1	106902	0.65487	24.0397	19.1916	43.2312	3	0.3	266813
Chr1	24742244	24799473	NIPAL3	+	0.887851	68.6827	22.9799	91.6626	0.6	1.3	37001	2.54264	61.6662	2.21138	63.8775	2.9	2.1	104850
Chr1	24828840	24863510	RCAN3	+	0.577479	76.1393	12.1626	88.3019	0.7	1.7	32185	4.26209	42.6323	9.85467	52.487	2.9	2.5	121976
Chr1	24822822	24828850	RCAN3AS	-	0	74.6099	11.5523	86.1622	1.6	0.8	7808	0.410143	41.2762	9.85467	51.1309	2.9	0.5	32939
Chr1	24865763	24882515	LOC100506985	-	0.595174	51.9874	22.438	74.4254	0.6	0.9	73906	1.13573	32.72	7.7235	40.4435	2.2	0.8	130833
Chr1	24882566	24935818	NCMAP	+	0.830529	61.13	22.438	83.568	0.8	0.7	71504	0.398473	35.5308	7.7235	43.2543	2.1	1.4	147822
Chr1	24969593	24999772	SRRM1	+	12.7344	81.0738	2.57604	83.6498	1.4	2.7	66984	6.20918	68.3179	0.143189	68.4611	4.1	2.9	80927
Chr1	25071759	25170815	CLIC4	+	12.0212	71.9873	11.9651	83.9524	0.7	2	398987	10.4275	60.7878	5.46391	66.2517	2.7	2	190233
Chr1	25245835	25245907	MIR6731	-	0	NA	85.8666	NA	0	0.1	0	0.00647036	NA	58.4748	NA	0.1	0.1	290
Chr1	25226001	25291501	RUNX3	-	0.173487	-26.5969	85.6221	59.0251	0	0.1	83017	0.103785	-15.4343	61.6042	46.1699	0.1	0.1	419762
Chr1	25548766	25559013	SYF2	-	13.2125	91.9121	1.63343	93.5455	1.1	1.3	18213	13.4928	80.6219	0.613736	81.2356	2.3	1.3	26973
Chr1	25568739	25573985	RSRP1	-	11.0133	66.9838	1.79508	68.7789	1	1.7	54712	5.8636	28.5774	0.564769	29.1422	4.4	3.5	95967
Chr1	25598976	25656936	RHD	+	0.582518	-0.185424	87.4387	87.2532	0	0.1	11832	0.333591	1.17864	47.2465	48.4252	0.1	0.1	38534
Chr1	25664788	25688852	TMEM50A	+	2.12753	88.4673	0.817804	89.2851	2	1.6	72966	2.73324	69.6153	0.15827	69.7736	4.2	2.1	97310
Chr1	25688739	25747363	RHCE	-	0.0586579	-1.74247	87.6269	85.8844	0	0.1	12166	0.12676	21.7722	15.5043	37.2765	4.5	2.1	35187
Chr1	25757348	25826698	TMEM57	+	13.8621	82.9449	2.28132	85.2262	1.2	2	253059	2.52004	65.4748	0.588797	66.0636	3.8	2.2	80568
Chr1	25870075	25895377	LDLRAP1	+	2.45058	67.2798	13.0297	80.3094	0.5	1.8	133350	2.19666	45.8545	6.51009	52.3646	2.4	1.8	81858
Chr1	25943958	26112698	MAN1C1	+	2.72188	77.9752	6.94168	84.9169	1.7	2.4	549638	0.244896	11.9592	19.5532	31.5124	2.3	0.3	471119
Chr1	26126666	26144713	SEPN1	+	1.02689	71.6637	13.5493	85.213	0.7	1	26846	0.852563	47.8675	6.46397	54.3315	1.8	1.2	51342
Chr1	26146396	26159433	MTFR1L	+	5.37564	79.5006	1.39603	80.8967	1.8	2	96941	2.43619	62.5162	0.338103	62.8543	4.5	2.4	51655
Chr1	26146444	26150097	LOC646471	-	0.774095	-85.6026	94.2016	8.59898	0	0.1	77821	0.530481	-75.543	78.0352	2.49216	0.1	0.1	36545
Chr1	26158403	26185949	AUNIP	-	1.61973	75.0501	17.3955	92.4456	0.9	1	22583	3.68556	68.9263	6.41688	75.3431	2.3	1.3	50702
Chr1	26187974	26197744	PAQR7	-	1.24214	46.4895	37.0422	83.5318	1.8	0.8	56372	0.992553	43.9539	11.2331	55.187	2.3	0.9	28723
Chr1	26232852	26232945	MIR3917	-	0	NA	5.9945	NA	1.1	2	302	0.00647036	NA	3.68223	NA	3.2	2	251
Chr1	26210676	26233368	STMN1	-	5.57653	61.2537	10.5934	71.8471	0.6	2.4	26596	10.8716	33.0927	7.3361	40.4288	3.2	2.4	60211
Chr1	26286257	26324648	PAFAH2	-	4.44772	79.8254	14.5766	94.402	0.7	1.4	47088	1.74652	68.3228	8.51394	76.8367	1.9	1.3	73803
Chr1	26348270	26362954	EXTL1	+	0.0484408	-21.2663	66.6347	45.3684	1.7	0.9	22486	0.00647036	1.26467	9.05852	10.3232	2.1	1	37178
Chr1	26364513	26372604	SLC30A2	-	0.0466989	75.2698	8.38907	83.6588	1.3	1	4378	0.121008	-17.484	46.1911	28.7071	0.1	0.1	11621
Chr1	26377795	26394125	TRIM63	-	0	10.6522	66.1444	76.7966	1.1	1	7661	0.00647036	2.18339	17.5405	19.7238	3.3	3.2	27132
Chr1	26437655	26452039	PDIK1L	+	2.8382	64.8238	2.79067	67.6145	1	1.9	129129	2.30463	45.4445	0.411283	45.8557	4.8	3.1	89382
Chr1	26485510	26489119	FAM110D	+	0.0389794	-56.0857	73.6589	17.5732	0	0.1	14435	0.108181	3.50386	5.39571	8.89958	2.1	1	10360
Chr1	26496387	26497364	ZNF593	+	4.25469	NA	12.5573	NA	0.8	0.9	13963	10.5017	NA	7.97828	NA	1.9	1	28530
Chr1	26503980	26516375	CNKSR1	+	0.114314	22.88	68.71	91.59	0.5	1.2	5306	0.00647036	-19.5753	47.8187	28.2434	5.1	5.1	23300
Chr1	26517118	26529033	CATSPER4	+	0.0833357	7.83169	75.1351	82.9668	1.3	0.8	4520	0.00647036	9.3801	22.9297	32.3099	1.6	0.5	22599
Chr1	26551810	26556331	LOC101928303	+	2.44562	63.7302	26.5176	90.2478	0.5	1.5	13877	0.351517	4.14671	37.7557	41.9024	3.8	3.8	8082
Chr1	26560643	26605529	CEP85	+	1.9268	82.7125	9.37805	92.0905	0.7	1.4	137692	6.19415	58.092	7.8226	65.9146	4.5	3.9	296929
Chr1	26606212	26608013	SH3BGRL3	+	3.53386	72.0953	9.75067	81.846	0.7	1.2	49955	8.38881	16.7715	2.14349	18.915	1.7	1.5	81382
Chr1	26644410	26647014	CD52	+	2.08516	-2.64616	79.6476	77.0015	0.2	0.4	6383	0.00647036	-11.3481	71.6427	60.2946	0.1	0.1	6324
Chr1	26608772	26644756	UBXN11	-	0.9637	-2.59602	78.6132	76.0171	0	0.1	95165	2.55572	-19.9959	67.4111	47.4152	0.1	0.1	180124
Chr1	26648349	26680621	AIM1L	-	0.0595942	-14.8936	90.0267	75.1331	0	0.1	18610	0.150819	18.1886	25.5113	43.6999	1	0.7	94752
Chr1	26688124	26699266	ZNF683	-	0	-14.4251	83.8067	69.3816	0	0.1	6144	0.00647036	4.63404	26.6439	31.278	3	3	25898
Chr1	26737268	26756219	LIN28A	+	0.241433	60.1919	6.74507	66.9369	2.3	3	7972	0.346089	-16.5469	38.9494	22.4024	0.1	0.1	26098
Chr1	26758772	26797795	DHDDS	+	2.15877	77.623	15.9573	93.5803	1	1.1	35611	2.79958	42.6457	32.5102	75.1559	1.9	1.5	72151
Chr1	26798901	26803133	HMGN2	+	15.1501	52.7177	2.36614	55.0838	1.3	1.7	65870	11.9366	21.3628	0.590152	21.9529	5.4	3.3	21995
Chr1	26856248	26901520	RPS6KA1	+	1.37153	71.3777	17.2419	88.6197	0.6	3.1	128946	2.5386	60.1936	9.22228	69.4159	3.2	2.6	146118
Chr1	26881032	26881084	MIR1976	+	0	NA	92.4136	NA	0.8	0.3	104	0.00647036	NA	80.7553	NA	1.9	0.2	356
Chr1	27022521	27108601	ARID1A	+	3.93377	72.5973	5.35755	77.9548	1.2	2.7	559006	1.389	54.0016	2.70875	56.7103	4.4	0.5	275123
Chr1	27114453	27124894	PIGV	+	3.18398	71.7814	3.14809	74.9295	1.8	1.9	162842	0.821747	38.6723	2.22394	40.8962	4.6	2.9	75361
Chr1	27153200	27182211	ZDHHC18	+	1.00856	74.7987	11.0521	85.8508	0.8	2.5	203595	4.78913	36.724	4.08397	40.808	4.4	2.9	257556
Chr1	27189632	27190947	SFN	+	0.265645	-32.2448	90.3839	58.1392	0	0.1	4264	14.5	-0.628725	0.628725	0	5	3.2	70067
Chr1	27205872	27216869	GPN2	-	1.4758	78.4539	9.98547	88.4393	0.6	1.6	45737	1.97972	46.8734	10.8652	57.7385	2.8	2.2	64848
Chr1	27216978	27226962	GPATCH3	-	1.41836	70.6697	12.9939	83.6636	0.6	1.2	37397	3.45027	58.7737	16.5765	75.3502	2.1	1.7	40344
Chr1	27237974	27240567	NR0B2	-	5.7771	8.7286	25.9521	34.6807	1.6	4.1	111968	0.00647036	30.7976	16.1851	46.9827	2.8	1	13644
Chr1	27248212	27273362	NUDC	+	21.6566	78.6112	6.51097	85.1222	0.8	1.4	173382	18.3938	68.764	2.29297	71.057	3.4	2.4	147336
Chr1	27276046	27286901	KDF1	-	0.640018	76.428	14.8907	91.3187	0.6	1.6	12939	0.0984619	44.7605	11.392	56.1525	1.6	1	29532
Chr1	27320194	27327377	TRNP1	+	0.252722	60.858	4.82862	65.6866	1.2	1.4	15558	47.4733	1.5272	1.12203	2.64922	9.2	5.1	251860
Chr1	27331510	27339333	FAM46B	-	0	60.1475	25.6858	85.8333	0.9	1.4	6907	0.414992	-47.4427	51.7608	4.31806	0.8	0.1	103451
Chr1	27425299	27481621	SLC9A1	-	0.255819	53.3144	34.8482	88.1627	0.8	0.8	158962	0.30205	30.6997	23.1404	53.8401	1.4	0.6	407771
Chr1	27561006	27635124	WDTC1	+	1.31773	80.0248	9.50529	89.5301	0.7	1.8	86758	0.262111	53.2495	6.25007	59.4996	2.6	1.9	115096
Chr1	27648635	27662891	TMEM222	+	2.81161	73.862	19.1245	92.9865	0.5	1.2	29679	3.05922	64.4686	9.82055	74.2892	1.8	1.2	70117
Chr1	27650364	27653016	LOC644961	+	310.214	9.55377	83.3949	92.9487	0	0.1	2121	51.5421	25.7662	58.8876	84.6538	0.1	0.1	7788
Chr1	27668482	27680423	SYTL1	+	0.0874181	-2.20998	53.0578	50.8478	0.9	2	26178	0.172277	18.0679	11.0015	29.0694	3.7	2.2	92844
Chr1	27681669	27693337	MAP3K6	-	0.459608	64.5291	3.66473	68.1939	0.8	1.7	40975	0.688068	58.086	2.02301	60.109	3.7	2.3	109807
Chr1	27695600	27701315	FCN3	-	22.4978	-5.76251	79.3286	73.5661	0.4	1.6	24059	0.00647036	-10.1503	39.0777	28.9274	1.1	0.9	19448
Chr1	27705589	27709823	CD164L2	-	0	49.9127	34.2857	84.1984	0.6	0.8	6495	0.00647036	-29.2927	45.7739	16.4812	0.1	0.1	8521
Chr1	27719147	27722317	GPR3	+	0.0412874	55.7148	10.9131	66.628	1.6	0.7	6168	0.573695	48.4174	12.4902	60.9076	1.2	0.6	15435
Chr1	27730733	27816678	WASF2	-	3.77154	77.9604	11.3347	89.2951	0.8	2.4	210796	3.07331	51.6704	8.97355	60.644	3.3	2.5	366962
Chr1	27860755	27930143	AHDC1	-	0.313725	67.1011	2.18502	69.2862	1.3	2.2	515510	0.315747	35.6168	2.84778	38.4646	7.3	2.3	879230
Chr1	27938800	27961727	FGR	-	0.353229	41.1512	34.0217	75.173	0.4	1.6	112420	0.00647036	-2.85807	35.6806	32.8225	0.1	0.1	48018
Chr1	27992571	27998724	IFI6	-	18.4861	40.6215	22.7767	63.3982	1	1.5	21157	2.8614	33.2017	0.567692	33.7694	4.8	3.5	29527
Chr1	28052489	28089423	FAM76A	+	2.28958	87.9987	6.61264	94.6113	0.9	1.5	44732	1.43159	62.9427	5.59104	68.5338	2.2	1.5	53044
Chr1	28099693	28150963	STX12	+	4.33186	86.7575	6.50383	93.2613	1	1.4	92396	2.37655	59.5034	13.6392	73.1426	2	1.5	184478
Chr1	28157251	28178183	PPP1R8	+	4.00016	86.5126	7.16064	93.6732	0.9	1.5	26890	6.25642	76.4579	1.12754	77.5855	3.5	2.3	68528
Chr1	28160911	28161077	SCARNA1	+	235.082	NA	95.059	NA	0	0.1	280	177.641	NA	74.1828	NA	0.1	0.1	112
Chr1	28199053	28213196	THEMIS2	+	2.71093	60.4534	26.6209	87.0743	0.5	1.2	115194	0.00647036	-15.8337	66.9137	51.0801	0.1	0.1	33939
Chr1	28218035	28241308	RPA2	-	5.41142	81.1358	10.985	92.1208	0.5	1.2	55634	11.4909	69.7906	9.69823	79.4889	1.5	1.2	58405
Chr1	28261503	28285663	SMPDL3B	+	0.0563638	38.0464	47.2202	85.2666	0.5	1.3	80358	0.185131	8.54379	36.1598	44.7036	1.4	0.9	58985
Chr1	28286503	28294604	XKR8	+	1.34561	65.6946	23.2856	88.9802	0.8	0.9	32924	0.94766	46.2452	11.0617	57.3069	3.3	2.5	18637
Chr1	28296854	28415148	EYA3	-	4.51515	65.9556	26.5129	92.4684	0.7	1.6	131354	2.83065	57.1194	12.5146	69.634	2.9	2.2	184797
Chr1	28473676	28520447	PTAFR	-	0.707284	-2.45057	90.7844	88.3339	0.7	0.1	68064	0.470249	30.9024	16.6121	47.5146	2.4	1	132547
Chr1	28526789	28559542	DNAJC8	-	16.0602	53.8271	38.9041	92.7312	0.4	1	40175	30.4169	42.0985	29.0721	71.1705	1.8	1.5	68917
Chr1	28562601	28564616	ATPIF1	+	68.579	74.6922	9.07451	83.7667	0.9	1.2	40634	32.2651	62.9265	2.29711	65.2236	2.2	1.2	37081
Chr1	28585962	28609002	SESN2	+	1.52801	70.0356	2.85505	72.8906	0.9	4.6	194248	1.11074	53.3866	0.450636	53.8372	4.1	3.1	115798
Chr1	28655512	28662478	MED18	+	2.84124	66.2179	26.8949	93.1128	0.6	1.1	40029	1.90241	58.6366	22.6344	81.271	1.4	1	38256
Chr1	28696092	28826881	PHACTR4	+	4.32977	73.2446	19.0647	92.3093	0.4	1.4	209591	1.17103	53.8545	15.4678	69.3223	2.1	1.8	399918
Chr1	28832454	28865708	RCC1	+	1.84664	58.0133	13.3933	71.4066	0.7	2.9	121455	10.9772	40.7434	0.533567	41.2769	6.1	5.1	313960
Chr1	28832454	28837404	SNHG3	+	1.2224	32.7712	13.3933	46.1645	0.7	2.9	63053	4.0369	1.16517	0.533567	1.69874	6.1	5.1	154975
Chr1	28879528	28905057	TRNAU1AP	+	1.27844	79.48	15.0775	94.5575	0.8	1.1	27301	3.25405	67.5387	3.85389	71.3926	2.4	1.5	80994
Chr1	28905254	28905334	SNORD99	-	3996.69	NA	82.3104	NA	0	0.1	418	2674.64	NA	19.9283	NA	6	1.4	396
Chr1	28906275	28906405	SNORA61	-	1060.79	NA	77.956	NA	0	0.1	244	1102.88	NA	8.39413	NA	5.9	2.4	574
Chr1	28906892	28907024	SNORA44	-	2627.26	NA	38.2678	NA	2.9	0.1	254	2369.51	NA	0.262375	NA	5.9	3	1122
Chr1	28907431	28907565	SNORA16A	-	375.679	NA	11.8458	NA	2.3	0.6	1249	1125.65	NA	0.404844	NA	5.8	3.4	1800
Chr1	28905049	28908366	SNHG12	-	1.23429	75.9817	2.83991	78.8216	1.5	1.5	19241	4.88351	8.37712	0.523491	8.90061	4.7	3.2	55630
Chr1	28918711	28921088	RAB42	+	0.403897	73.7795	20.0914	93.8709	0.4	1.1	1631	0.719544	55.2863	9.76842	65.0548	1.8	1.1	10447
Chr1	28929608	28969604	TAF12	-	6.00781	90.577	3.74471	94.3217	1.2	1.3	40329	13.6097	60.6248	0.973179	61.598	3.5	1.9	104658
Chr1	28975111	28975246	RNU11	+	7070.96	NA	25.883	NA	0.8	0.9	2951	3746.08	NA	8.37771	NA	2.1	1.3	1164
Chr1	28995239	29042115	GMEB1	+	2.32191	79.3231	14.6739	93.997	0.6	1.5	43916	1.34061	59.9108	16.4273	76.3381	2.1	1.4	112719
Chr1	29063132	29096287	YTHDF2	+	9.80387	79.2005	5.29153	84.4921	0.8	1.9	88217	10.1834	52.9534	3.65949	56.6129	4.3	3.6	146545
Chr1	29138653	29190208	OPRD1	+	0.0424614	67.5423	15.7255	83.2678	0.5	1.6	19303	0.00647036	-4.93101	55.4092	50.4782	0.1	0.1	185979
Chr1	29213602	29446558	EPB41	+	11.2646	78.9513	9.12972	88.0811	0.7	1.6	409483	7.49629	66.4184	3.13728	69.5557	2.2	1.5	493122
Chr1	29445936	29450421	TMEM200B	-	1.04732	21.5831	7.31017	28.8933	1.4	2.7	21758	1.40775	21.8113	13.7356	35.5469	3.4	2.2	42958
Chr1	29474249	29508637	SRSF4	-	10.4168	69.5492	8.57107	78.1203	0.6	3.1	278696	7.32164	62.7797	2.00154	64.7812	3.8	3.1	134343
Chr1	29519168	29557470	MECR	-	1.2326	75.999	12.9322	88.9313	0.5	1.3	47689	1.32039	61.8963	8.73186	70.6282	1.6	1.2	75428
Chr1	29563027	29653325	PTPRU	+	0.559677	65.1937	7.74742	72.9411	0.7	2.6	138039	0.215507	23.1579	1.78396	24.9419	7.3	3.5	203685
Chr1	29656131	29676626	LOC101928460	-	0	0.759811	71.1876	71.9474	0	0.1	8895	0.00647036	-3.46636	10.3169	6.85053	1	0.5	31442
Chr1	30486798	30510459	LOC101929406	-	0	-19.4066	85.5552	66.1486	0	0.1	11657	0.00647036	-18.3335	24.8583	6.52472	0.1	0.1	23025
Chr1	31191618	31199593	MATN1-AS1	+	0	80.9934	6.98599	87.9794	1	1.4	58309	0.260074	49.5997	8.57528	58.175	2.3	1.5	58757
Chr1	31184123	31196432	MATN1	-	0.0456823	-36.3915	85.9231	49.5316	0	0.1	75222	0.0720438	-23.8554	58.1163	34.261	0.1	0.1	74959
Chr1	31212002	31212079	MIR4420	-	0	NA	89.9635	NA	0	0.1	77	0.00647036	NA	24.9486	NA	5.1	5	205
Chr1	31205314	31230683	LAPTM5	-	9.26346	19.2194	61.2903	80.5097	0.9	1.4	112413	0.00647036	-7.04375	31.5645	24.5207	0.1	0.1	45468
Chr1	31342312	31381480	SDC3	-	4.3541	67.2189	12.2725	79.4913	1	1.3	114918	0.713235	35.5441	5.89881	41.4429	2.1	1.4	94559
Chr1	31408535	31408623	SNORD103B	-	140.912	NA	86.3675	NA	0.2	5.1	35	34.0056	NA	63.2015	NA	5.1	5.1	88
Chr1	31421964	31422052	SNORD103B	-	140.912	NA	89.2357	NA	4	0.1	71	34.0056	NA	79.3791	NA	0.1	0.1	88
Chr1	31441009	31441084	SNORD85	-	1877.21	NA	83.8071	NA	0.7	1	271	0.00647036	NA	36.5231	NA	2.9	2	445
Chr1	31404352	31538564	PUM1	-	6.66305	69.4834	16.3788	85.8622	0.6	3.7	321184	4.08008	47.4687	11.5337	59.0025	5.4	4.8	443739
Chr1	31652591	31712734	NKAIN1	-	0.125393	71.4829	4.70962	76.1925	0.7	1.6	20986	0.125393	30.1565	2.68991	32.8464	2.6	2	94290
Chr1	31732414	31769644	SNRNP40	-	7.10124	90.0882	2.70409	92.7922	1.5	2	41880	16.6263	71.0134	0.374167	71.3876	3.7	2.1	79047
Chr1	31769828	31837800	ZCCHC17	+	7.49756	91.8513	1.9202	93.7715	2	1.4	50598	20.8299	75.6263	0.477962	76.1043	3.7	1.5	124943
Chr1	31838099	31845923	FABP3	-	2.61358	51.0816	27.5264	78.608	1.2	0.4	20969	0.913066	44.0683	6.69286	50.7611	1.8	0.4	17377
Chr1	31882411	31907527	SERINC2	+	4.05513	-30.7256	87.9324	57.2068	0	0.1	301173	2.01511	20.9031	10.0231	30.9261	2.5	1.9	130406
Chr1	31971838	31974167	LINC01225	+	0	-2.36802	89.0797	86.7117	0	0.1	3136	0.00647036	7.30394	31.3338	38.6377	0.1	0.1	11058
Chr1	31984035	31989846	LINC01226	+	0.189983	-10.3114	90.7816	80.4701	0	0.1	4560	0.317529	-11.4894	51.7282	40.2387	0.1	0.1	20448
Chr1	32042085	32053287	TINAGL1	+	2.54965	23.1706	51.4774	74.648	1.3	0.6	82818	2.66807	60.8715	0.432294	61.3038	5.8	2	91769
Chr1	32083300	32092919	HCRTR1	+	0.0491949	67.3269	17.1834	84.5103	0.6	1.2	5681	0.093234	48.6401	7.10975	55.7499	6	1	16655
Chr1	32095462	32110838	PEF1	-	2.4726	84.9169	4.35529	89.2722	0.7	1.5	82423	2.5322	60.712	8.01909	68.7311	1.7	1.3	60290
Chr1	32117847	32169768	COL16A1	-	0.21532	52.5917	27.0323	79.6241	1.4	0.6	55718	0.25685	13.089	16.7084	29.7975	1.8	0.4	153021
Chr1	32224260	32224336	MIR4254	-	0	NA	93.3922	NA	0	0.1	0	0.00647036	NA	49.5965	NA	0.1	0.1	465
Chr1	32192717	32229648	BAI2	-	0	65.2686	6.54153	71.8101	1.1	1.8	18654	0.272785	31.899	1.45594	33.355	5.6	4.2	132615
Chr1	32256022	32281652	SPOCD1	-	0	19.9747	59.9144	79.8891	1	0.7	15890	0.9637	-2.02006	33.2942	31.2742	2.1	0.3	108124
Chr1	32372021	32403988	PTP4A2	-	17.273	71.9327	13.9763	85.9089	0.7	1.9	165244	37.3822	41.5012	1.24748	42.7487	7.6	5.1	219188
Chr1	32479294	32526460	KHDRBS1	+	11.1993	85.2009	3.30932	88.5102	0.7	2.2	99600	14.1622	60.1505	2.77712	62.9276	4.6	4	180451
Chr1	32538502	32568467	TMEM39B	+	0.731937	86.6942	6.67658	93.3707	1	1.1	163862	0.853695	72.2891	4.39488	76.6839	2.1	1	80117
Chr1	32573643	32642168	KPNA6	+	3.68042	73.4152	17.9817	91.3969	0.6	1.7	168272	2.96913	60.9177	5.4088	66.3265	3.1	2.2	201611
Chr1	32645344	32663886	TXLNA	+	8.48581	84.9449	5.31004	90.2549	2.9	1.5	87185	5.6696	60.7382	3.57709	64.3153	5.2	2.7	92532
Chr1	32666201	32670991	CCDC28B	+	0.237275	49.4568	10.8274	60.2842	1.3	1.3	17753	1.25566	17.3868	3.5486	20.9354	4.8	1.3	15076
Chr1	32671235	32674288	IQCC	+	0.40588	83.402	10.0951	93.4971	0.8	1.2	4804	1.42906	67.8226	2.67141	70.494	2.1	1.2	27334
Chr1	32674694	32681797	DCDC2B	+	0.186481	0.718655	86.8686	87.5873	0	0.1	6404	0.224814	28.5511	26.3069	54.858	1.6	1.1	18597
Chr1	32681797	32687926	TMEM234	-	0.318881	82.5941	6.23452	88.8286	1	1.1	18966	0.85406	51.3568	4.52831	55.8851	2.8	1.1	34507
Chr1	32687970	32697205	EIF3I	+	17.8576	80.6501	9.80801	90.4581	1	1.1	72690	19.1376	64.4535	6.50872	70.9622	2.7	1.7	42931
Chr1	32697260	32707311	MTMR9LP	-	0.500586	48.5879	22.1252	70.7132	0.2	1.8	39081	0.0866054	31.2251	16.2615	47.4866	1.8	1.6	53047
Chr1	32712817	32714461	FAM167B	+	0.723796	-49.8312	80.0833	30.2521	0	1.9	27060	0.00647036	-13.8814	39.8328	25.9514	3.6	2.1	7468
Chr1	32716839	32751768	LCK	+	0.204027	4.9192	76.0239	80.9431	0	0.1	62001	0.00647036	-6.69982	57.9659	51.2661	0.1	0.1	65174
Chr1	32757707	32799224	HDAC1	+	8.5633	79.1215	11.8331	90.9546	0.8	1.2	95423	33.4007	57.8846	0.947208	58.8318	4.3	1.8	417121
Chr1	32799429	32801840	MARCKSL1	-	3.64127	38.1211	6.05422	44.1753	0.9	1.6	12305	9.32081	-1.35341	1.74403	0.390625	4.4	3.7	41144
Chr1	32826870	32827844	FAM229A	-	0	NA	24.9487	NA	0.5	0.9	3638	0.00647036	74.8618	25.1382	100	2.2	0.8	2762
Chr1	32827861	32829924	TSSK3	+	0.679403	47.7938	24.9487	72.7424	0.8	0.6	5332	0.175565	23.2863	24.9547	48.241	2.2	1.5	3778
Chr1	32830704	32860062	BSDC1	-	5.91298	87.5429	4.12504	91.668	1.3	1.3	118650	2.43379	75.5968	0.78623	76.3831	2.9	1.5	80494
Chr1	32930657	32953459	ZBTB8B	+	0.0779744	69.4633	14.5969	84.0601	1	1	10348	0.0824664	-30.2532	56.2216	25.9684	0.1	0.1	33931
Chr1	33004745	33071551	ZBTB8A	+	1.33911	80.1415	14.242	94.3835	0.4	1.5	26779	0.968883	53.3692	6.21985	59.5891	2.1	1.8	102449
Chr1	33087306	33116185	ZBTB8OS	-	14.4775	90.389	3.22439	93.6134	1.8	1	42469	13.6659	69.488	0.116951	69.6049	4.3	2.5	87913
Chr1	33116748	33151812	RBBP4	+	5.89916	91.8639	0.595817	92.4597	1.5	1.3	71647	3.21775	68.4941	0.214754	68.7089	4.4	1.4	130273
Chr1	33145506	33168361	SYNC	-	5.38417	78.1769	11.2279	89.4049	1.1	1.5	22053	3.76996	45.9963	5.4184	51.4147	2.7	1.5	48703
Chr1	33207511	33240571	KIAA1522	+	0.511626	62.283	10.5067	72.7897	0.9	2.5	131738	1.21496	39.8746	1.61667	41.4912	3.7	2.6	464291
Chr1	33283042	33324480	S100PBP	+	1.47729	90.6366	1.28138	91.918	1.4	1.9	95084	2.34756	76.9196	0.411682	77.3312	3.7	1.7	116520
Chr1	33240839	33283633	YARS	-	9.50096	89.1284	1.83495	90.9633	1.2	2.1	149055	8.13118	67.069	1.37651	68.4455	3.7	2.7	221117
Chr1	33327868	33338093	FNDC5	-	4.17969	-11.8552	50.273	38.4178	0.9	0.5	84973	0.187808	23.464	11.5116	34.9757	3	2.2	19708
Chr1	33352097	33360247	HPCA	+	0	33.0363	17.0196	50.0558	1.8	1.2	2587	0.113011	-9.40299	43.297	33.894	0.1	0.1	17987
Chr1	33360195	33366953	TMEM54	-	0.245429	60.4671	18.6727	79.1398	0.9	1.4	6766	2.73515	51.0438	3.46712	54.511	2.9	1.8	23161
Chr1	33402049	33430286	RNF19B	-	2.55402	82.5193	3.71086	86.2302	0.8	3.1	128585	5.17172	44.2787	0.423361	44.7021	5.3	4.4	317251
Chr1	33473540	33502512	AK2	-	20.2432	62.1587	18.3267	80.4854	0.6	1.5	269357	17.8057	41.8938	15.2822	57.1759	2.3	1.8	132831
Chr1	33546713	33585995	ADC	+	0.111851	69.4197	12.5096	81.9293	0.6	1.3	36772	0.125746	24.7874	5.87236	30.6598	1.8	1.2	60859
Chr1	33611002	33647671	TRIM62	-	0.25685	77.9895	4.55127	82.5407	0.9	1.8	45203	0.167445	41.9503	13.2714	55.2217	2.1	1.3	67892
Chr1	33722173	33766320	ZNF362	+	1.05052	81.0529	4.03289	85.0858	1.3	2.1	148539	0.517814	50.8638	2.33496	53.1988	3.4	2	89981
Chr1	33772366	33786699	A3GALT2	-	0	-6.13116	74.8795	68.7484	1.1	1.2	11236	0.00647036	52.3336	8.93659	61.2702	3.5	1.2	18946
Chr1	33797993	33798093	MIR3605	-	0	NA	77.9029	NA	0.1	0.6	1493	6.86692	NA	36.3531	NA	1	0.9	904
Chr1	33789223	33841194	PHC2	-	5.18731	-35.281	92.8451	57.5641	0	0.1	777056	3.68201	-27.6841	62.014	34.3299	0.1	0.1	322790
Chr1	33938231	33961995	ZSCAN20	+	0.315892	80.2488	12.1646	92.4134	0.8	0.7	15266	0.812674	64.9394	3.83412	68.7735	5.5	0.5	29169
Chr1	34326075	34330392	HMGB4	+	0	2.66163	68.5046	71.1663	2.3	0.1	1393	0.00647036	0.666667	1.25	1.91667	0.1	0.1	4215
Chr1	34334556	34351059	CSMD2-AS1	+	0	-2.41229	79.1388	76.7266	0.1	2.7	7545	0.00647036	-6.6461	9.65591	3.00981	0.1	0.1	19143
Chr1	33979598	34631443	CSMD2	-	0.0417105	69.1555	3.87359	73.0291	1.9	3.3	270465	0.0589361	-34.0996	40.7294	6.62985	0.1	0.1	753774
Chr1	34632483	34684731	C1orf94	+	0	51.3747	12.4497	63.8244	4.2	1	18706	0.077519	-28.5046	37.5717	9.06709	0.8	0.7	65309
Chr1	35220647	35224113	GJB5	+	0.160381	8.69435	79.5487	88.2431	1.1	0.6	826	0.115444	14.1888	19.0692	33.258	3.2	0.6	6355
Chr1	35225341	35229325	GJB4	+	0.0441272	21.8709	60.6197	82.4906	0.4	1.3	2489	0.0791633	40.2475	19.8283	60.0757	1.5	1.2	10627
Chr1	35246789	35251967	GJB3	+	0.219827	65.7359	10.1481	75.884	0.3	1.8	18937	0.827259	56.5747	5.63007	62.2048	3.8	0.8	28438
Chr1	35258598	35261348	GJA4	+	1.14878	63.8414	23.1369	86.9782	0.7	1	23604	0.00647036	-7.1134	38.8226	31.7092	0.1	0.1	7314
Chr1	35315962	35325417	SMIM12	-	1.60231	65.4134	15.3819	80.7953	0.6	1.4	103495	0.948557	58.1681	9.93901	68.1071	1.9	1.3	42420
Chr1	35331036	35370984	DLGAP3	-	0.0390101	-30.916	83.6638	52.7478	0	0.1	24446	0.117604	13.2223	10.1557	23.378	1.7	0.4	61627
Chr1	35441299	35444307	LOC653160	-	0.252899	-5.76549	88.3756	82.6101	0.3	2.4	1966	0.0754051	38.5172	54.2739	92.7911	2.1	1.1	3822
Chr1	35447126	35450948	ZMYM6NB	-	4.80597	88.2984	1.82479	90.1231	1	1.6	34461	2.68286	77.7266	0.116538	77.8431	3.4	1.7	19452
Chr1	35451766	35497569	ZMYM6	-	1.42454	83.7167	10.6512	94.368	0.4	1.5	51928	1.20998	75.4097	1.56222	76.972	2.1	1.6	74617
Chr1	35525386	35581459	ZMYM1	+	1.83698	-1.33412	85.8816	84.5474	0	0.1	44576	4.65916	27.195	34.5925	61.7875	0.1	0.1	114401
Chr1	35649200	35658743	SFPQ	-	45.4051	31.922	10.0299	41.9519	0.7	3.7	135530	80.2955	17.12	0.883797	18.0038	6.2	3.9	39723
Chr1	35734567	35887545	ZMYM4	+	4.13959	87.4779	4.03631	91.5142	0.7	1.3	165024	5.33885	74.8985	3.34632	78.2448	2.4	1.4	187768
Chr1	35899090	36023037	KIAA0319L	-	8.95762	88.0982	1.75341	89.8516	1.4	1.9	266545	4.33824	67.4701	0.995473	68.4656	4.5	2.9	206640
Chr1	36023392	36032380	NCDN	+	0.706027	74.2545	2.45955	76.714	2.1	1.2	22812	1.25163	48.3459	1.2138	49.5597	4.4	1.3	29361
Chr1	36038970	36060927	TFAP2E	+	0.0624489	41.0206	19.7066	60.7272	0.5	1.6	9502	0.0892408	26.6079	30.045	56.6529	1.2	0.6	43346
Chr1	36065142	36107445	PSMB2	-	5.00745	87.3518	2.75875	90.1105	1.2	1.5	104842	1.88519	73.5512	0.267589	73.8188	5.8	4.5	120986
Chr1	36179476	36184790	C1orf216	-	0.646312	47.8699	20.7316	68.6015	0.4	1.4	14451	2.02349	19.4726	11.3491	30.8217	2.8	2.5	27954
Chr1	36197712	36235551	CLSPN	-	0.213858	77.8467	15.7101	93.5567	0.6	1.4	24863	3.39595	63.6238	8.72971	72.3535	2.4	1.7	62695
Chr1	36273827	36323490	AGO4	+	1.83288	78.1697	10.8681	89.0379	0.9	1.7	80055	0.647199	55.0728	6.16943	61.2422	5.2	4.4	108151
Chr1	36348809	36389899	AGO1	+	1.79835	84.1785	9.32794	93.5065	0.6	1.4	39695	1.07072	70.3587	8.23884	78.5976	2.2	1.9	84607
Chr1	36396682	36522063	AGO3	+	3.74095	92.8705	1.01113	93.8817	1.4	1.5	138632	2.0798	76.8794	0.282667	77.162	4.1	2.4	142113
Chr1	36549675	36553876	TEKT2	+	0.0439185	48.8657	41.1737	90.0394	0.3	1.1	4164	0.00647036	29.1191	30.3546	59.4738	1.3	0.9	10246
Chr1	36554452	36559533	ADPRHL2	+	1.84156	79.6083	11.7488	91.3571	0.7	1.4	34205	3.85643	71.0835	7.30488	78.3883	2.1	1.4	26890
Chr1	36560843	36565850	COL8A2	-	0.0861369	32.6673	52.0751	84.7424	0.5	1.1	5439	0.104795	25.8329	13.0648	38.8977	2.6	1.9	16437
Chr1	36621565	36646451	MAP7D1	+	1.32606	81.2012	1.80495	83.0061	1	1.7	106561	3.76044	54.5412	0.221875	54.7631	3.3	1.9	144024
Chr1	36602169	36621654	TRAPPC3	-	6.10923	61.6961	1.96088	63.657	1.6	1.2	143503	8.35158	41.3899	0.108811	41.4988	3.3	1.6	195165
Chr1	36690016	36770957	THRAP3	+	12.9865	83.3804	1.0382	84.4186	1.2	1.9	368074	16.8876	55.1171	0.358947	55.4761	3.3	2.1	409776
Chr1	36771993	36786948	SH3D21	+	0.135117	72.8596	7.56762	80.4272	0.4	1.5	24693	0.890258	77.5739	1.07214	78.6461	3.4	1.5	65869
Chr1	36787631	36789755	EVA1B	-	0.503029	37.1649	8.33654	45.5014	0.6	2.1	24498	2.45058	76.1222	1.78024	77.9024	2.6	1.3	37860
Chr1	36805219	36851528	STK40	-	3.15206	83.7762	1.81201	85.5882	1.6	1.6	378304	1.20398	52.859	1.8515	54.7105	5.2	2.8	344708
Chr1	36859030	36863493	LSM10	-	4.49759	85.0556	8.19909	93.2547	0.5	1.1	43745	5.65942	71.7301	4.10275	75.8329	2.2	1.5	35033
Chr1	36883506	36916086	OSCP1	-	0.438262	52.8466	36.1216	88.9682	0.8	0.9	23036	0.902241	25.0677	22.8964	47.964	1.4	0.6	44274
Chr1	36921361	36930040	MRPS15	-	30.4169	85.5421	4.96808	90.5102	0.9	1.1	30430	39.7689	74.1524	8.23637	82.3887	1.7	1.1	36007
Chr1	36931643	36948915	CSF3R	-	0.277059	20.8636	66.8766	87.7402	0	1.9	23008	0.00647036	27.4276	18.0567	45.4843	2.9	2.3	48171
Chr1	37261127	37499844	GRIK3	-	0.0457325	56.829	6.14452	62.9736	4.5	2.2	88953	0.00647036	-35.6456	41.2984	5.65272	0.1	0.1	316184
Chr1	37627163	37627235	MIR4255	+	0	NA	67.6417	NA	0	0.1	117	0.00647036	NA	0	NA	6.2	3.4	120
Chr1	37920479	37940044	LINC01137	-	0.362574	78.257	4.95182	83.2089	1.1	1.2	72240	0.514691	42.1485	1.35791	43.5064	8.4	3.4	118393
Chr1	37940118	37949978	ZC3H12A	+	0.449545	62.3231	5.98804	68.3111	1.2	1.1	329444	2.43348	5.74142	1.34274	7.08415	8.5	5.1	341726
Chr1	37945830	37945890	MIR6732	+	0	NA	37.8221	NA	1.4	0.3	2286	0.00647036	NA	0.361	NA	6.9	1.9	2848
Chr1	37966535	37966595	MIR5581	-	0	NA	93.6494	NA	0	0.1	45	0.00647036	NA	38.2654	NA	5.6	4.8	31
Chr1	37955560	37980420	MEAF6	-	3.79635	82.4307	7.12707	89.5578	0.8	1.5	58710	3.66918	59.6509	5.05822	64.7091	2.5	1.5	50887
Chr1	38000049	38019945	SNIP1	-	1.63085	75.2285	17.0201	92.2486	0.3	1.1	138100	1.37744	60.7495	13.8089	74.5583	1.5	1.1	49895
Chr1	38022519	38032458	DNALI1	+	0.969178	42.8385	43.4031	86.2416	0.6	0.6	18013	2.11205	21.9241	38.9432	60.8674	1.2	0.6	18591
Chr1	38032412	38061586	GNL2	-	12.6886	86.538	5.31075	91.8488	1	1.2	39983	28.3158	76.4236	0.1	76.5236	6.4	1.4	51136
Chr1	38076950	38100595	RSPO1	-	0.194872	54.1416	5.53698	59.6786	1.7	1.9	11343	0.0807176	-12.9087	19.6781	6.76937	0.1	0.1	41296
Chr1	38147241	38156192	C1orf109	-	1.79297	74.3081	14.8169	89.125	0.5	1.1	11928	2.72678	53.1864	1.79988	54.9863	4.7	1.6	33294
Chr1	38158072	38175391	CDCA8	+	0.208503	85.8734	6.96671	92.8401	1.1	1	9688	6.40941	72.3579	0.14108	72.499	4.6	1.3	60349
Chr1	38181645	38230824	EPHA10	-	0.277901	48.1253	8.22092	56.3462	2.5	1.4	16127	0.240266	-9.74129	35.1092	25.3679	0.1	0.1	65489
Chr1	38259773	38267278	MANEAL	+	1.18789	70.1109	9.22152	79.3325	1	2	4975	1.66055	39.8249	17.353	57.1779	1.5	1.1	19823
Chr1	38273472	38275126	C1orf122	+	1.20359	-3.7949	6.08183	2.28692	0.7	2	32885	3.04642	-1.4384	3.7719	2.3335	5.2	4.4	32471
Chr1	38268613	38273865	YRDC	-	1.09438	89.1237	2.60182	91.7255	1.5	1.2	22524	3.12199	68.8355	1.37502	70.2105	5.2	1.3	23260
Chr1	38275238	38325292	MTF1	-	0.910325	89.1835	3.12859	92.3121	1.1	1.2	92133	0.79992	71.5163	1.22896	72.7453	5.1	1.4	103722
Chr1	38326368	38412729	INPP5B	-	3.49213	60.6278	25.4883	86.1161	1	1.4	260695	0.923844	47.8268	9.22118	57.0479	4.6	1.1	321475
Chr1	38422651	38455761	SF3A3	-	12.1788	68.8567	20.5987	89.4554	0.7	2.5	45244	17.6211	60.1325	11.326	71.4586	3	2.2	76399
Chr1	38462441	38471187	FHL3	-	0.237348	63.201	15.9023	79.1033	0.8	1.3	83987	0.40399	54.1645	3.78058	57.9451	2.8	1.6	56925
Chr1	38478383	38490497	UTP11L	+	13.7038	75.2594	13.3495	88.6089	0.6	1.1	37234	20.536	61.5869	2.98556	64.5725	4.4	3.5	57727
Chr1	38509522	38512450	POU3F1	-	0.11886	4.23697	7.05492	11.2919	1.3	2.9	1194	0.0923653	20.567	54.8595	75.4265	0.1	0.1	1624
Chr1	38554902	38555001	MIR3659	+	0	NA	87.2416	NA	0	0.1	34	0.00647036	NA	3.15625	NA	4.2	2.5	7
Chr1	38674705	38680439	LINC01343	-	0.14383	9.55835	69.976	79.5344	0	0.1	4858	0.00647036	1.14139	7.89976	9.04115	1.1	0.5	7898
Chr1	39303868	39325495	RRAGC	-	3.8061	86.8901	1.50948	88.3996	1.1	1.3	43162	4.0576	65.1408	1.17793	66.3188	2.8	1.5	47901
Chr1	39328161	39339050	MYCBP	-	1.67792	90.2362	4.72089	94.9571	1	1.2	17448	3.86133	74.1098	0.473693	74.5835	3.1	2	52385
Chr1	39339738	39347298	GJA9	-	0.0646259	3.11201	91.435	94.547	2.4	0.6	3819	0.436076	7.75821	70.2783	78.0365	1.2	1	11897
Chr1	39328161	39347298	GJA9-MYCBP	-	0.147868	-26.1458	91.435	65.2892	2.4	0.6	25938	0.508989	-17.629	70.2783	52.6493	1.2	1	75040
Chr1	39351478	39407456	RHBDL2	-	0.284869	14.8148	75.7268	90.5416	0.8	1.1	18309	1.46444	19.555	35.694	55.249	2.1	1.6	111947
Chr1	39456915	39471737	AKIRIN1	+	7.64281	82.7462	4.2213	86.9676	1	1.9	48807	8.45254	55.6281	0.591	56.2191	3.7	2	55624
Chr1	39491966	39500308	NDUFS5	+	118.672	75.3675	17.9399	93.3074	0.7	1.2	55277	218.002	65.9026	9.45065	75.3532	2.3	1.3	51008
Chr1	39549838	39952810	MACF1	+	15.7059	-15.09	95.5409	80.4509	0	0.1	1792487	4.8693	7.13999	48.8535	55.9935	0.1	0.1	719336
Chr1	39875175	39882154	KIAA0754	+	2.94742	77.0292	2.53	79.5592	2.5	1	25865	2.56093	49.4835	1.18631	50.6698	6	3	10614
Chr1	39957317	39995541	BMP8A	+	0.416915	59.3577	9.82349	69.1812	1.1	1.4	26839	0.243696	-30.5145	66.3006	35.7862	0.1	0.1	36186
Chr1	39987951	40025370	PPIEL	-	0.796802	18.8519	71.7533	90.6052	0.3	1.2	38157	0.475888	-26.4597	88.5263	62.0667	0.1	0.1	55573
Chr1	40033045	40033182	SNORA55	-	327.827	NA	76.2835	NA	0.5	1.5	1673	103.755	NA	42.7639	NA	1.9	1.7	412
Chr1	40026484	40042521	PABPC4	-	9.90756	60.0068	9.39787	69.4047	0.4	2.7	75516	9.1508	29.6339	5.04965	34.6835	5	4.6	64141
Chr1	40089102	40105348	HEYL	-	0.22533	45.7264	21.286	67.0124	0.7	0.6	75339	0.00647036	-41.2829	56.1844	14.9015	0.1	0.1	24491
Chr1	40124792	40137710	NT5C1A	-	0	77.128	7.14338	84.2714	1.3	1.3	5594	0.00647036	23.4546	3.38026	26.8349	6.5	5.1	18032
Chr1	40144319	40157382	HPCAL4	-	0	52.8094	7.07618	59.8856	1.3	1.9	7435	0.00647036	13.6528	21.6597	35.3126	0.7	0.6	17602
Chr1	40204516	40229586	PPIE	+	6.41064	63.1694	28.1639	91.3333	0.4	1	26672	12.4668	47.2075	27.6442	74.8517	1.1	0.8	47663
Chr1	40235196	40237020	OXCT2	-	0.196839	56.5596	9.90082	66.4604	0.6	1.4	0	0.00647036	25.8299	29.018	54.8479	2.5	0.6	0
Chr1	40223902	40254533	BMP8B	-	0.414058	58.0859	10.1981	68.284	1	1.5	11452	0.198436	-49.2472	89.3006	40.0534	0.1	0.1	25116
Chr1	40306705	40349177	TRIT1	-	1.71312	69.7593	20.2899	90.0492	0.6	1.2	94353	2.73718	64.4675	8.97851	73.446	2.2	1.5	86249
Chr1	40361095	40367687	MYCL	-	2.00771	42.7351	4.69903	47.4341	0.9	3.7	113776	0.171408	13.6366	5.74394	19.3805	2.4	1.8	10347
Chr1	40420783	40435640	MFSD2A	+	3.66721	65.0346	9.43356	74.4682	0.7	2.4	109852	0.375422	44.0559	10.0693	54.1252	1.9	1.6	44747
Chr1	40506254	40538321	CAP1	+	20.1137	88.2346	1.51921	89.7538	1.6	1.5	118735	45.7187	65.6535	0.244541	65.898	3.7	2.1	128868
Chr1	40538381	40563142	PPT1	-	6.74136	70.6766	18.0127	88.6893	0.7	1.2	29054	6.89854	54.6288	11.1039	65.7327	1.7	1	48254
Chr1	40627040	40706593	RLF	+	3.48833	76.8805	16.6169	93.4974	0.5	2.6	92833	4.51953	67.2604	10.9052	78.1656	3.1	2.6	115100
Chr1	40713572	40717365	TMCO2	+	0	0.69792	88.1604	88.8583	0.4	1.5	2558	0.00647036	-10.8107	60.3112	49.5005	0.1	0.1	5109
Chr1	40723721	40759856	ZMPSTE24	+	7.86311	82.3439	10.8504	93.1943	1.4	1.1	87927	9.78107	70.8154	0.161458	70.9769	2.9	1.4	105392
Chr1	40766162	40782939	COL9A2	-	0	57.9946	10.2834	68.278	0.5	2.4	10906	0.15932	18.5279	27.5022	46.0301	0.1	0.1	39445
Chr1	40839377	40888998	SMAP2	+	7.89027	77.8011	4.01333	81.8145	0.9	1.7	526905	2.12504	55.8432	2.74288	58.586	2.8	2.1	108148
Chr1	40916336	40929390	ZFP69B	+	0.617879	85.2691	9.84757	95.1167	1.4	0.8	11848	1.66372	69.0429	2.19644	71.2393	2.6	0.9	20772
Chr1	40943301	40962015	ZFP69	+	0.94882	87.8098	7.06013	94.87	1.1	1.1	12393	2.90529	75.1882	2.3041	77.4923	3.2	2.2	18775
Chr1	40974432	40982214	EXO5	+	1.45562	83.961	12.9634	96.9244	0.8	1	12261	1.40329	69.4746	17.9356	87.4101	1.8	1.2	17010
Chr1	40997232	41013841	ZNF684	+	7.61175	78.9354	8.70977	87.6451	0.7	2.3	81863	1.5019	65.4464	8.72341	74.1698	3	2.5	27783
Chr1	41086351	41131324	RIMS3	-	0.11361	63.9482	18.9079	82.8561	0.7	0.7	36095	0.21659	27.3923	6.4102	33.8025	1.7	0.6	87246
Chr1	41157241	41237275	NFYC	+	5.77884	77.2254	5.4281	82.6535	0.6	2.5	535537	3.63495	59.9104	1.12353	61.0339	3.6	2.8	179025
Chr1	41154751	41157933	NFYC-AS1	-	0.469685	80.2783	2.59124	82.8695	1.7	1.4	80510	0.847786	49.2123	0.146747	49.359	3.6	1.6	34868
Chr1	41220026	41220118	MIR30E	+	8.48807	NA	75.9706	NA	0	0.1	837	0.00647036	NA	65.7176	NA	0.1	0.1	368
Chr1	41222955	41223044	MIR30C1	+	16.1032	NA	66.2839	NA	0.2	2.4	1063	0.00647036	NA	50.9916	NA	0.1	0.1	287
Chr1	41249683	41306124	KCNQ4	+	0.0414706	53.6364	20.0311	73.6675	2.1	0.7	76217	0.00647036	-6.59084	37.2769	30.6861	3.2	0.1	105208
Chr1	41326727	41328018	CITED4	-	0.834816	-1.60502	5.56117	3.95615	0.8	1.9	43648	0.411114	1.19029	2.41125	3.60154	2.4	1.7	2727
Chr1	41445006	41478235	CTPS1	+	10.6186	61.9053	14.2425	76.1478	0.3	2.4	217134	3.5349	42.9594	17.8402	60.7996	2.9	2.8	96218
Chr1	41480261	41509562	SLFNL1-AS1	+	1.23083	4.73054	86.416	91.1465	0.6	1.5	82513	0.46897	-5.34267	72.2174	66.8747	0.1	0.1	46071
Chr1	41481268	41487427	SLFNL1	-	0.912708	24.683	70.7229	95.4059	0.9	0.9	14150	0.131805	38.6226	28.2204	66.843	5.5	3.4	11962
Chr1	41492870	41707815	SCMH1	-	1.7669	80.8525	8.17515	89.0277	0.7	2	596543	1.18328	61.7181	5.95511	67.6732	2.6	1.9	210174
Chr1	41827602	41849263	FOXO6	+	0.157763	30.307	3.50459	33.8115	1.4	1.3	19805	1.40609	20.5915	7.70382	28.2953	1.8	0.4	44896
Chr1	41944445	41950344	EDN2	-	0	26.7788	53.8854	80.6642	0.8	0.8	8032	0.00647036	20.0829	13.5311	33.614	1.1	0.7	22883
Chr1	41972035	42501596	HIVEP3	-	0.326489	73.5447	6.83722	80.3819	0.8	1.4	486002	0.130278	15.4288	5.7442	21.173	2	1.4	735874
Chr1	42619091	42621495	GUCA2B	+	0.101961	17.2438	73.5462	90.79	2.1	0.5	1112	0.00647036	30.5943	7.44415	38.0384	2.6	0.9	6762
Chr1	42628361	42630395	GUCA2A	-	0	11.5179	79.0498	90.5677	1.7	0.6	1821	0.00647036	30.243	23.6279	53.8709	2.3	0.7	3846
Chr1	42642209	42801548	FOXJ3	-	3.66211	73.2712	12.4837	85.7549	0.7	2.7	292031	3.73037	59.7725	6.10406	65.8765	3.9	3.1	282554
Chr1	42846467	42889900	RIMKLA	+	0.0896505	79.5312	5.99071	85.5219	1.1	1.1	17199	0.0973617	-51.3773	83.5784	32.2011	0.1	0.1	98336
Chr1	42896000	42921938	ZMYND12	-	0.651693	69.23	20.4784	89.7085	1.2	0.8	56678	0.0772982	28.4332	24.6271	53.0604	1.7	0.5	66195
Chr1	42922011	42939049	PPCS	+	21.609	34.764	18.7081	53.4721	0.8	1.2	58009	10.9822	12.4136	22.3431	34.7567	1.6	1.2	76154
Chr1	43000559	43120335	CCDC30	+	0.439075	-5.24034	93.1631	87.9228	0	0.1	36019	0.356808	-25.0764	51.0189	25.9425	0.1	0.1	114440
Chr1	43124047	43142429	PPIH	+	2.85319	89.2748	6.14436	95.4191	0.9	1.2	13846	21.2964	77.5449	2.79815	80.3431	2.5	1.8	43561
Chr1	43148065	43168020	YBX1	+	67.4081	83.4267	1.09093	84.5177	1.4	1.7	33790	126.282	33.0606	0.135228	33.1959	6.4	5.1	58749
Chr1	43198763	43205925	CLDN19	-	0.114612	11.931	74.9456	86.8765	1	0.3	4378	0.150116	-9.6815	45.8946	36.2131	2.1	0.3	19625
Chr1	43212005	43232755	LEPRE1	-	2.37486	84.4141	1.50939	85.9235	1.4	2.1	59410	4.67802	61.6292	1.04613	62.6753	4.7	2.8	82263
Chr1	43232915	43241413	C1orf50	+	3.26418	87.3452	1.83225	89.1775	2.1	1.4	55694	1.3006	68.8746	1.21943	70.094	4.7	1.8	35577
Chr1	43253660	43263901	LOC100129924	+	0	-6.11245	94.0689	87.9565	0	0.1	6567	0.00647036	-10.6124	49.8472	39.2348	2.7	0.8	14649
Chr1	43282775	43310660	ERMAP	+	2.3349	83.8273	3.13377	86.9611	0.9	1.8	152702	0.875439	43.397	1.57679	44.9738	3.4	1.6	100766
Chr1	43272722	43283059	CCDC23	-	1.6988	88.9267	3.1336	92.0603	1.4	1.3	40715	5.57435	63.7987	1.29797	65.0966	3.4	2.2	42792
Chr1	43312243	43318146	ZNF691	+	1.1824	85.7195	4.40326	90.1228	1	1.9	27435	0.237275	80.412	0.81	81.222	4.3	2.3	37584
Chr1	43323292	43354463	LOC339539	+	0.29349	-9.75704	94.7436	84.9866	0	0.1	15517	0.08606	-16.4397	45.8587	29.419	5.2	5.1	36019
Chr1	43424719	43449029	SLC2A1-AS1	+	0.0670938	75.6137	6.72857	82.3423	1.4	1	13421	0.628383	41.2423	1.04222	42.2846	4.1	1.2	145393
Chr1	43391045	43424847	SLC2A1	-	0.0580862	76.0022	7.2143	83.2165	0.8	1.6	85064	6.15375	33.997	1.12048	35.1175	4.1	3.1	800043
Chr1	43613593	43622067	FAM183A	+	0	54.2601	26.1496	80.4097	0.8	0.7	3801	0.246407	-7.08126	25.4216	18.3403	0.7	0.1	10993
Chr1	43637322	43637383	MIR6733	-	0	NA	19.2935	NA	1.6	0.5	141	0.00647036	NA	14.3548	NA	1.7	0.4	448
Chr1	43638000	43720029	WDR65	+	2.52156	68.3762	10.4201	78.7964	1	1.1	296632	0.0698199	20.6839	5.88974	26.5737	1.5	0.7	102118
Chr1	43629844	43638241	EBNA1BP2	-	12.3757	81.5552	8.5612	90.1164	0.7	1.4	15080	51.316	75.6821	3.67404	79.3561	1.6	1.2	26772
Chr1	43735664	43739673	TMEM125	+	0.0510093	25.8331	63.8818	89.7149	0	0.1	4040	0.00647036	12.688	25.4528	38.1408	0.1	0.1	5887
Chr1	43747556	43751288	C1orf210	-	0.265968	13.6618	61.3125	74.9742	0.6	0.7	23785	0.15264	-15.6327	32.81	17.1773	0.7	0.2	5722
Chr1	43766565	43788781	TIE1	+	1.70752	-4.90003	85.2033	80.3033	0	0.1	90779	0.00647036	-2.35989	29.9563	27.5964	0.1	0.1	44510
Chr1	43803474	43820135	MPL	+	0.253478	-32.0154	88.353	56.3376	0.7	0.8	60226	0.32451	-4.08747	34.5795	30.492	0.1	0.1	82254
Chr1	43824625	43828873	CDC20	+	0.0963971	81.8281	5.80491	87.633	1	1.3	3839	8.50173	52.3485	0.297684	52.6462	2.6	1.7	64912
Chr1	43830318	43830386	MIR6734	-	0	NA	88.706	NA	0	0.1	126	0.00647036	NA	65.6481	NA	0.1	0.1	291
Chr1	43829067	43833745	ELOVL1	-	1.87943	71.7889	3.3194	75.1083	1	1.8	31827	4.06395	35.9764	0.380645	36.357	4.3	2.4	76143
Chr1	43849578	43855483	MED8	-	3.31855	87.128	2.27388	89.4019	1.1	1.6	37078	1.50903	66.4842	1.336	67.8202	2.9	1.8	31515
Chr1	43855555	43919918	SZT2	+	0.843079	79.7088	2.27388	81.9827	1.6	1.2	144761	0.504781	65.8377	1.336	67.1737	2.9	1.2	181891
Chr1	43914209	43914282	MIR6735	+	0	NA	66.9202	NA	0.6	0.7	718	0.00647036	NA	34.302	NA	1.6	0.8	1180
Chr1	43916673	43919660	HYI	-	8.44951	86.8304	4.33408	91.1644	1.5	1.2	32049	3.32276	67.7905	0.653169	68.4437	6.4	1.4	21423
Chr1	43996546	44089343	PTPRF	+	12.4052	73.9215	10.457	84.3784	0.4	2.1	605540	3.86669	61.8604	2.91971	64.7801	3.5	2.9	544495
Chr1	44115796	44171189	KDM4A	+	4.34782	83.58	7.93012	91.5102	1.9	2.2	83176	3.12526	71.0788	6.00929	77.0881	4.2	2.4	120873
Chr1	44165408	44173012	KDM4A-AS1	-	1.20948	89.8014	2.66909	92.4705	1.6	1.2	25089	1.11215	75.0065	1.61567	76.6222	4.1	2.1	26035
Chr1	44173203	44396837	ST3GAL3	+	1.08245	89.7572	2.46907	92.2263	1.3	1.5	206824	0.643901	66.529	1.60896	68.1379	4.1	1.9	371019
Chr1	44304293	44304355	MIR6079	+	0	NA	93.3082	NA	0	0.1	0	0.00647036	NA	61.328	NA	0.1	0.1	94
Chr1	44398991	44402912	ARTN	+	0	-1.0532	14.5444	13.4912	0.4	1.9	6413	0.00647036	-1.91271	5.4725	3.55979	2.4	2	13096
Chr1	44412477	44433694	IPO13	+	1.03566	90.2309	2.21264	92.4435	1.1	1.8	36626	1.26844	72.0696	0.375187	72.4448	3.4	2.1	77550
Chr1	44435652	44439043	DPH2	+	1.76157	71.8721	21.459	93.3311	0.5	1	7711	4.1248	62.4004	11.7925	74.1929	1.7	1.2	20616
Chr1	44440601	44443972	ATP6V0B	+	4.79092	77.0637	2.97511	80.0388	0.8	1.2	62487	9.47342	27.4927	1.09324	28.586	2.6	1.7	49557
Chr1	44444873	44456843	B4GALT2	+	0.738165	85.4097	4.57769	89.9874	1.1	1.1	31419	1.52754	49.7894	1.67016	51.4595	4	2.4	59294
Chr1	44457279	44462198	CCDC24	+	0.151232	76.6558	13.694	90.3498	0.8	1.1	12769	0.255453	35.0139	10.0154	45.0294	1.3	0.7	30712
Chr1	44462154	44497164	SLC6A9	-	0.0627412	65.5051	10.4663	75.9714	0.4	2.2	43627	0.281929	27.404	5.69445	33.0985	3.5	3.2	171714
Chr1	44584521	44600809	KLF17	+	0.0908984	-2.88262	90.828	87.9454	0	0.1	5373	0.10921	-11.3224	33.6245	22.3021	0.1	0.1	12320
Chr1	44679124	44686351	DMAP1	+	6.14373	75.2719	10.815	86.0869	0.8	1.1	30389	6.60972	49.206	7.57194	56.7779	1.5	1	44483
Chr1	44688266	44709955	ERI3-IT1	-	0.389951	3.76215	84.7513	88.5134	0	0.1	32286	0.255819	1.06064	83.8357	84.8963	0.1	0.1	44875
Chr1	44686741	44820939	ERI3	-	3.61264	74.9035	15.3432	90.2467	0.7	1	307321	5.34636	70.5913	5.68583	76.2772	1.6	0.8	249712
Chr1	44870959	45117396	RNF220	+	0.988351	59.8112	9.07947	68.8906	0.3	4.7	213448	2.07719	42.9692	0.312143	43.2813	3.2	1.8	573818
Chr1	45011164	45011224	MIR5584	+	0	NA	78.2593	NA	0	0.1	21	0.00647036	NA	43.6293	NA	0.1	0.1	120
Chr1	45119500	45140099	TMEM53	-	2.65737	79.47	6.09724	85.5673	0.9	1.2	176580	1.29527	52.1659	4.08752	56.2534	1.9	1	101922
Chr1	45140393	45191263	C1orf228	+	0.384086	76.8962	6.00553	82.9017	1.3	0.7	394364	0.189523	46.4057	4.44977	50.8555	2	0.8	288209
Chr1	45205489	45233438	KIF2C	+	0.0805298	87.2062	7.7906	94.9968	1.1	1.4	13861	19.9412	71.6663	7.88752	79.5539	2.2	1.4	67563
Chr1	45241245	45244412	RPS8	+	188.695	65.5022	10.5191	76.0213	0.8	1.5	42870	659.635	12.5471	0.225385	12.7725	4.3	3	72118
Chr1	45241536	45241610	SNORD55	+	16834	-8.33143	8.33143	0	1.1	1.2	3099	11418.9	-0.113527	0.113527	0	4.3	2.7	3737
Chr1	45242163	45242261	SNORD46	+	490.593	NA	22.5837	NA	1.7	0.6	2138	341.887	NA	0.0942564	NA	4.3	2.1	1817
Chr1	45243513	45243584	SNORD38A	+	3216.18	NA	81.6515	NA	0	0.1	295	3606.25	NA	15.0687	NA	4.3	0.8	1474
Chr1	45244061	45244130	SNORD38B	+	1406.56	NA	82.2784	NA	0.4	0.1	69	350.357	NA	27.7929	NA	4.3	0.2	407
Chr1	45249256	45253426	BEST4	-	0.0528682	-69.7706	88.2023	18.4317	0	0.1	13216	0.0912266	-54.0899	56.961	2.87115	0.1	0.1	19577
Chr1	45266035	45271667	PLK3	+	0.348168	77.5167	15.499	93.0157	1	1	25342	0.650595	64.0687	0.931196	64.9999	4.9	2.7	35210
Chr1	45271585	45272957	TCTEX1D4	-	0.0904617	39.7181	56.7056	96.4237	3.5	0.5	58302	0.18051	63.5443	32.7212	96.2655	5.7	0.7	67201
Chr1	45274153	45279801	BTBD19	+	0.24574	16.344	17.4851	33.829	1.6	0.5	130402	0.199241	7.55151	0.464286	8.0158	5.7	3.9	119628
Chr1	45285515	45308616	PTCH2	-	48.3891	49.1473	28.8664	78.0137	0.9	0.6	54091	8.2583	-36.1691	76.5691	40.4	0.1	0.1	75585
Chr1	45316193	45452394	EIF2B3	-	8.49399	56.8722	36.5151	93.3873	0.4	1.6	93535	7.00601	42.8619	33.1279	75.9898	1.9	1.6	203760
Chr1	45468219	45477027	HECTD3	-	2.68815	88.7017	1.46391	90.1656	2	1.4	26434	3.01905	76.1679	0.0415676	76.2095	6.2	1.5	32529
Chr1	45477804	45481341	UROD	+	16.3153	74.0001	2.18652	76.1867	2	1.3	32616	13.7186	26.463	0.613208	27.0762	6	3.9	41042
Chr1	45482075	45672250	ZSWIM5	-	0.154783	85.5612	3.23255	88.7938	0.9	1.8	79262	0.865833	64.9037	0.408107	65.3118	6.3	5.1	391920
Chr1	45769581	45771291	LINC01144	+	0.13443	61.2683	11.4689	72.7372	0.9	1.3	39005	0.14554	32.9139	2.61358	35.5275	2.5	1.4	32662
Chr1	45792544	45794346	HPDL	+	0.0507704	58.4447	27.4681	85.9128	1	1	2043	0.0985364	-8.17409	85.2719	77.0978	0.1	0.1	3624
Chr1	45805341	45809650	TOE1	+	0.608297	76.0505	7.44068	83.4911	0.5	1.8	62949	1.5413	63.3664	1.03994	64.4063	3.8	2.2	64282
Chr1	45794913	45806142	MUTYH	-	0.780407	88.3967	2.15939	90.5561	0.9	1.5	63619	1.85695	64.3928	0.514345	64.9071	3.9	2.6	120365
Chr1	45809554	45956840	TESK2	-	0.817514	77.4386	12.4843	89.9229	0.8	2.2	190279	0.27347	30.3717	8.58109	38.9528	3.5	2.8	195522
Chr1	45959597	45965751	CCDC163P	-	0.421462	85.3522	4.38545	89.7376	2.6	1	16579	0.415751	37.0921	1.25942	38.3516	4.6	1.8	14457
Chr1	45965855	45976739	MMACHC	+	5.80068	76.2621	4.38545	80.6476	1	2.6	119779	1.62621	34.4836	1.25942	35.743	4.6	2.8	55491
Chr1	45976706	45988562	PRDX1	-	96.3893	10.0337	34.6173	44.651	0.1	4.1	109401	242.554	4.22315	1.76927	5.99242	6	5.1	190950
Chr1	46016454	46035723	AKR1A1	+	35.2024	65.8403	21.8581	87.6984	0.5	2.1	103176	7.88094	47.3136	14.5894	61.903	2.7	2.2	80266
Chr1	46049659	46084578	NASP	+	16.9309	76.6388	9.43079	86.0696	0.8	3.2	88772	45.8049	51.9586	4.60975	56.5684	4.3	3.3	122322
Chr1	46085715	46089731	CCDC17	-	0.140127	-18.153	88.5357	70.3827	0	0.1	11408	0.0883336	-26.723	87.6439	60.9208	0.1	0.1	8991
Chr1	46111451	46112357	RPS15AP10	-	2.55814	NA	92.9612	NA	0	0.1	1209	1.65348	NA	81.2865	NA	0.1	0.1	1898
Chr1	46092975	46152302	GPBP1L1	-	15.9978	83.8855	0.992043	84.8776	2.5	2.4	197587	8.08385	70.705	0.168907	70.8739	5	2.1	133656
Chr1	46153846	46160108	TMEM69	+	1.99669	82.232	6.05128	88.2833	3.9	1.1	21701	1.534	66.4713	1.04877	67.5201	5.2	1.5	29989
Chr1	46159997	46216485	IPP	-	2.01342	65.4025	28.0482	93.4507	0.5	1.1	65159	1.4472	54.6133	14.4674	69.0807	1.7	1.1	89091
Chr1	46269284	46501796	MAST2	+	1.08722	73.213	18.316	91.529	1	1.9	263464	2.40291	61.6679	4.95228	66.6202	3.1	2.2	616886
Chr1	46505811	46598708	PIK3R3	-	1.75617	86.3524	2.31244	88.6649	0.9	2.8	126874	1.77946	59.0022	0.108182	59.1104	4.2	3.2	205948
Chr1	46640748	46651634	TSPAN1	+	0.316438	-11.645	79.2431	67.5981	1	0.5	103217	0.574481	-4.73106	30.4367	25.7057	4	0.7	127530
Chr1	46669005	46686928	LURAP1	+	0.268716	62.1529	27.3671	89.52	0.6	1.3	9295	0.183297	-40.4156	81.1779	40.7624	0.1	0.1	25566
Chr1	46654352	46685977	POMGNT1	-	4.00527	-13.9796	81.1021	67.1224	0	0.1	81714	6.4616	32.5576	20.179	52.7365	1.2	0.7	133296
Chr1	46713366	46744145	RAD54L	+	0.0630666	88.0072	6.17782	94.1851	1.1	1.4	16258	1.37887	72.8612	3.48232	76.3435	2.9	2	61534
Chr1	46744071	46769038	LRRC41	-	2.38915	77.2921	1.54364	78.8357	1.5	2.4	108786	2.57671	65.0438	0.282696	65.3265	5.3	2.3	109815
Chr1	46769379	46782447	UQCRH	+	49.4097	85.8264	6.66188	92.4882	2.6	1.3	39681	113.588	55.8022	0.339246	56.1415	5.4	2.8	85344
Chr1	46805848	46830824	NSUN4	+	1.97158	69.2175	19.3007	88.5182	0.5	1.6	107649	1.97751	71.7251	0.526455	72.2516	3.1	1.5	111005
Chr1	46859938	46879520	FAAH	+	2.61036	63.3448	18.6747	82.0195	0.4	1.6	48601	0.0912591	-3.52928	29.2404	25.7111	3.5	3.4	38633
Chr1	46899498	46911374	LOC729041	+	0.03739	-8.24966	78.5765	70.3269	0	0.1	6917	0.086102	16.7266	1.2636	17.9902	3.9	2.6	25116
Chr1	46972667	46979886	DMBX1	+	0.129054	-3.4539	85.1791	81.7252	0	0.1	2985	0.168181	-9.20794	41.1853	31.9773	0.1	0.1	14462
Chr1	47004367	47035927	MKNK1-AS1	+	0.325574	-9.75348	83.38	73.6265	0	0.1	15323	0.245063	39.0459	5	44.0459	5	1.1	52196
Chr1	47011315	47016887	KNCN	-	0	5.44624	62.0887	67.5349	0	2.1	2313	0.00647036	-6.8815	23.2713	16.3898	0.1	0.1	6772
Chr1	47023078	47069966	MKNK1	-	2.59666	76.9725	15.0054	91.9778	0.8	1.1	77258	1.93935	62.4055	10.7111	73.1166	1.9	1.3	82490
Chr1	47073386	47082563	MOB3C	-	1.37374	80.4086	8.035	88.4436	0.6	3.2	43499	1.14878	48.9106	9.51013	58.4207	1.6	1.1	47431
Chr1	47100710	47134099	ATPAF1	-	21.3505	82.1057	8.18236	90.288	0.7	1.5	32468	13.6739	72.3908	3.66556	76.0564	3.8	3	46330
Chr1	47137496	47139256	TEX38	+	0	-9.56184	87.8968	78.335	0	0.1	597	0.156964	23.6307	61.151	84.7817	0.1	0.1	1908
Chr1	47139707	47157769	EFCAB14-AS1	+	0.118913	6.06101	86.2738	92.3348	2.5	0.7	21223	0.00647036	19.4283	57.0396	76.4679	3.4	1.3	17684
Chr1	47140830	47184736	EFCAB14	-	9.43993	85.4577	5.22197	90.6797	1.1	1.1	49738	6.44316	65.8657	1.01962	66.8853	2.9	1.9	76340
Chr1	47264669	47285021	CYP4B1	+	0.0411323	18.3885	61.9617	80.3501	5	0.9	13134	0.00647036	-1.67114	6.20762	4.53648	0.1	0.1	20637
Chr1	47308766	47366147	CYP4Z2P	-	0.0549126	0.42611	76.482	76.9081	5	0.1	10547	0.00647036	8.37249	1.85167	10.2242	5.1	0.1	38861
Chr1	47394845	47407156	CYP4A11	-	44.7232	31.5278	28.7718	60.2996	1.9	3.5	80112	0.11479	1.55782	0	1.55782	5.2	3.3	10877
Chr1	47489239	47516423	CYP4X1	+	0.525572	32.8853	49.8217	82.7071	0.4	2.6	22013	0.00647036	-49.7609	59.365	9.60411	0.1	0.1	31062
Chr1	47533159	47583992	CYP4Z1	+	0.0680591	6.69642	71.1083	77.8048	0	0.1	9183	0.0725457	12.2096	3.94111	16.1507	4.5	4	26321
Chr1	47603106	47614526	CYP4A22	+	23.6562	32.7537	36.9329	69.6865	1.3	3.2	43523	0.102376	3.32036	1.18647	4.50683	5.8	5.1	10836
Chr1	47644921	47646011	LINC00853	+	0.482671	52.7195	31.3705	84.09	0.5	1.2	2301	0.490422	-7.32213	7.32213	0	4.2	3.8	7621
Chr1	47649260	47655771	PDZK1IP1	-	0.116871	13.7346	76.049	89.7837	0.2	0.3	7763	2.08128	55.4619	1.58569	57.0476	5	1.4	28264
Chr1	47681961	47698007	TAL1	-	0.359116	17.7342	11.3944	29.1286	0.7	3.6	59497	0.111481	-29.0911	66.0118	36.9207	0.1	0.1	21933
Chr1	47715810	47779819	STIL	-	0.25417	79.995	13.8965	93.8915	1	1.4	20326	2.6603	54.3197	20.2806	74.6003	2.3	1.6	115550
Chr1	47799468	47844511	CMPK1	+	31.4726	85.4623	5.19442	90.6568	0.9	1.8	152580	20.0318	64.3068	2.39702	66.7038	4.9	2.8	191255
Chr1	47881743	47883724	FOXE3	+	0.169497	9.4882	11.4861	20.9743	0.3	2	1194	0.134358	-10.3238	91.2607	80.9369	0.1	0.1	1116
Chr1	47897806	47900313	FOXD2-AS1	-	0.0456951	0.357833	52.7089	53.0667	0.1	0.6	1725	0.643008	-66.5493	74.3993	7.85	0.1	0.1	30658
Chr1	47901688	47906363	FOXD2	+	0.110764	-15.8805	32.074	16.1936	0	0.1	20059	0.68641	-2.26272	17.6797	15.417	3.5	3.1	97437
Chr1	48226199	48462562	TRABD2B	-	0.576405	78.9466	3.76386	82.7105	1.4	1.5	604173	0.00647036	31.1994	1.44398	32.6434	4.6	2.4	426987
Chr1	48567386	48648100	SKINTL	-	0.318296	-15.1475	90.2071	75.0596	0	0.1	22015	0.229159	-5.17373	15.9929	10.8191	0.1	0.1	65185
Chr1	48688356	48714316	SLC5A9	+	0.998406	40.4369	48.9912	89.4281	1.7	1.2	45414	0.101769	11.9476	6.32077	18.2683	6.9	1.9	44609
Chr1	48761043	48937880	SPATA6	-	0.728816	73.9411	12.2446	86.1857	0.7	1.2	78663	0.830233	40.058	16.9692	57.0271	1	0.5	139625
Chr1	49193539	49242547	BEND5	-	0.363275	75.073	9.36158	84.4346	1.1	1.2	24037	0.00647036	-20.6275	24.5136	3.88603	0.1	0.1	47991
Chr1	49839872	49937757	AGBL4-IT1	-	0	20.5817	49.558	70.1397	3.6	0.7	32039	0.00647036	4.6774	0	4.6774	6.5	2.7	64420
Chr1	48998526	50489626	AGBL4	-	0.18129	55.648	18.0735	73.7215	0.9	0.7	636998	0.0671153	-30.7804	38.0157	7.23527	0.1	0.1	1196041
Chr1	50513685	50667540	ELAVL4	+	0.0810487	65.2664	10.9316	76.1979	0.4	1.3	97406	0.0964703	-37.1261	41.5744	4.4483	0.1	0.1	132923
Chr1	50883222	50889119	DMRTA2	-	0.0648451	-2.39211	9.90525	7.51314	0.1	0.3	1642	0.0702965	0.11175	71.952	72.0637	0.1	0.1	6019
Chr1	50906934	51425936	FAF1	-	10.4918	86.0826	7.55214	93.6347	0.8	1.5	324840	6.31102	66.0408	8.27106	74.3119	3.2	2.6	510772
Chr1	51434366	51440309	CDKN2C	+	0.297088	27.4488	3.28845	30.7372	1.4	2.9	57848	4.3209	8.4307	0.782185	9.21288	6.2	4.3	107542
Chr1	51567905	51613754	C1orf185	+	0	8.1945	76.397	84.5915	1	3.7	13078	0.00647036	-1.00374	25.1517	24.1479	5.5	3.9	40445
Chr1	51701944	51739119	RNF11	+	14.5146	82.6509	6.62373	89.2747	1.1	2.5	174862	11.4252	58.5002	6.85182	65.3521	5.3	3.4	122928
Chr1	51752929	51810785	TTC39A	-	0.178588	49.9104	25.3001	75.2106	0.6	1	72186	1.84174	11.9486	33.0057	44.9543	0.9	0.5	282998
Chr1	51819934	51984995	EPS15	-	11.6326	88.0532	3.07788	91.131	0.6	2.2	262462	5.71599	70.2193	0.263404	70.4827	6	4.5	186641
Chr1	52082545	52254891	OSBPL9	+	16.2326	61.8274	22.3839	84.2113	0.3	1.4	679601	7.35715	45.5077	9.1927	54.7004	5.2	5.1	415594
Chr1	52302015	52302074	MIR761	-	0	NA	93.6107	NA	0	0.1	104	0.00647036	NA	83.05	NA	0.1	0.1	0
Chr1	52254865	52344609	NRD1	-	18.2649	84.7226	8.3185	93.0411	0.8	1.6	176305	18.2115	65.585	8.52469	74.1097	3.9	3.3	182322
Chr1	52373627	52456436	RAB3B	-	0.357662	72.8136	12.6229	85.4365	0.6	1.2	44671	1.88088	45.0226	6.47007	51.4927	3.8	1.1	227429
Chr1	52497776	52499472	KTI12	-	1.05034	51.1688	5.71717	56.886	0.3	1.4	30350	4.00527	-2.79153	2.79153	0	2.7	2.4	73468
Chr1	52485803	52521843	TXNDC12	-	7.22711	63.3836	0.342179	63.7258	1.6	2.1	150321	8.99509	44.7527	0	44.7527	4.2	2.5	205578
Chr1	52521856	52556388	BTF3L4	+	3.81451	92.7191	0.348889	93.068	2	1.7	63166	4.0962	73.4952	0	73.4952	4.3	1.8	84004
Chr1	52607765	52812358	ZFYVE9	+	5.05096	90.3549	2.41519	92.7701	1.6	1.8	141589	3.48758	65.1219	0.55196	65.6739	4	2	257444
Chr1	52816264	52831877	CC2D1B	-	1.46856	77.2328	13.8799	91.1126	0.7	1.3	50231	2.27533	69.042	6.29586	75.3379	2.4	1.6	70003
Chr1	52838500	52870143	ORC1	-	0.135087	92.8298	1.59936	94.4291	1.1	1.6	18907	3.00007	74.3252	0.493605	74.8188	4.4	2.9	75596
Chr1	52870218	52883992	PRPF38A	+	7.08258	91.3215	2.67272	93.9942	1.6	1.2	41400	5.05934	78.0512	0.760541	78.8117	4.5	1.6	41697
Chr1	52888947	53018762	ZCCHC11	-	6.54898	90.3365	2.04746	92.3839	1.1	2.8	138054	2.9485	65.5523	1.56757	67.1198	3.6	2.7	146062
Chr1	53068042	53074723	GPX7	+	0.608405	77.7367	15.1306	92.8673	0.5	1.1	7164	1.31851	24.2427	12.3554	36.5981	1.2	0.9	8833
Chr1	53099065	53122737	FAM159A	+	0	68.73	20.8077	89.5376	0.8	0.8	41283	0.00647036	-22.3902	56.598	34.2078	0.1	0.1	32518
Chr1	53152013	53164038	COA7	-	3.98358	69.8835	17.1586	87.0422	0.7	1	36902	5.38783	59.5049	3.03932	62.5443	2.3	1.5	70018
Chr1	53192130	53293013	ZYG11B	+	9.2602	69.38	19.8918	89.2718	0.7	2.1	206092	2.91375	53.7851	16.199	69.9841	2.9	2	165513
Chr1	53308182	53360247	ZYG11A	+	0.463058	79.3793	10.4796	89.8589	0.8	1.8	34333	1.51876	65.6526	3.75693	69.4095	4.2	3.6	141997
Chr1	53361581	53387446	ECHDC2	-	26.6227	52.7442	16.806	69.5503	0.5	1.4	343060	1.48645	53.9068	3.87283	57.7796	2	1.3	79344
Chr1	53392900	53517289	SCP2	+	99.7032	76.7935	10.8213	87.6148	2.1	2.6	240580	11.2971	56.5074	9.69412	66.2015	2.1	1.6	182912
Chr1	53527723	53551174	PODN	+	0.6687	70.4315	15.6649	86.0964	0.6	1.5	18348	0.0834597	-1.36013	46.3708	45.0106	0.1	0.1	50871
Chr1	53552850	53608304	SLC1A7	-	0.0744182	-7.55299	92.4889	84.9359	0	0.1	110214	0.656322	-39.4249	79.6363	40.2115	0.1	0.1	458827
Chr1	53662100	53679869	CPT2	+	7.21751	82.8972	6.79164	89.6888	1.5	2.2	166909	1.35569	72.0843	1.23472	73.3191	5.2	1.5	49478
Chr1	53679771	53686289	C1orf123	-	8.05465	78.8223	12.6461	91.4683	0.8	1.1	55285	5.58749	56.4047	4.08607	60.4908	2.6	1.7	35585
Chr1	53704281	53708455	LOC100507564	+	0	74.2806	15.4344	89.7149	1	0.7	15157	0.440721	30.5142	9.95206	40.4662	1.6	0.7	40280
Chr1	53692563	53704282	MAGOH	-	21.3088	76.4674	15.4344	91.9018	0.6	1.1	20672	26.0058	63.766	9.95206	73.7181	1.6	1	29219
Chr1	53708040	53793821	LRP8	-	0.190203	66.4989	10.259	76.7579	0.6	2.6	44329	8.36256	43.1221	7.10553	50.2276	4.6	4.2	485789
Chr1	53904042	53905693	SLC25A3P1	-	0	0.628816	96.1536	96.7825	0	0.1	796	0.00647036	-2.59271	83.2414	80.6487	0.1	0.1	2396
Chr1	53925071	53933158	DMRTB1	+	0.0407886	-5.00383	89.2887	84.2849	0	0.1	3184	0.0588923	-39.675	73.0376	33.3626	0.1	0.1	12701
Chr1	53971905	54199877	GLIS1	-	0.0399399	-7.2269	85.9013	78.6744	0	0.1	102485	0.00647036	-7.04243	25.6091	18.5667	3.5	0.2	369857
Chr1	54231133	54304225	NDC1	-	1.31851	88.7353	4.97138	93.7067	0.9	1.5	85937	8.77816	76.3039	1.85281	78.1567	2.1	1.6	168445
Chr1	54317391	54355487	YIPF1	-	3.5999	79.1513	6.72884	85.8802	0.7	1.2	102701	2.09156	57.6221	0.831818	58.4539	3.1	2.1	54438
Chr1	54359860	54376759	DIO1	+	32.0614	31.284	44.5735	75.8574	0.5	5.1	153651	0.303356	14.024	17.6928	31.7168	2.4	1.4	59715
Chr1	54387233	54411288	HSPB11	-	20.4926	87.0283	7.05257	94.0809	1.9	1	36113	34.6542	65.2017	7.32764	72.5293	3.3	0.9	56250
Chr1	54411998	54433841	LRRC42	+	3.034	80.2293	4.81335	85.0427	1.6	1.3	85004	6.2835	46.7348	3.98373	50.7186	3.3	1.8	86271
Chr1	54472970	54483859	LDLRAD1	-	0.184874	8.72625	77.0373	85.7636	0.7	2.3	5446	0.349356	6.47229	25.7236	32.1959	3.1	2.5	45506
Chr1	54497348	54519111	TMEM59	-	28.1494	85.0333	3.20343	88.2368	1.2	1.9	76282	7.76773	70.0231	0.263734	70.2869	4.3	2.2	83512
Chr1	54519273	54565416	TCEANC2	+	0.880128	83.6798	4.88775	88.5675	2	1.1	95445	1.23885	52.482	0.470516	52.9525	4.2	2	123463
Chr1	54519751	54519827	MIR4781	+	0	NA	12.7763	NA	2.4	0.7	508	0.00647036	NA	2.61788	NA	4.3	1.6	957
Chr1	54604667	54618679	CDCP2	-	0.0494499	20.314	69.3147	89.6286	0	0.1	4975	0.00647036	9.74082	27.9384	37.6793	0.1	0.1	24372
Chr1	54638026	54665746	CYB5RL	-	0.369062	86.6217	4.4022	91.0239	1.5	1	44398	0.514614	57.5237	1.02596	58.5497	3.2	1.2	62818
Chr1	54665839	54684056	MRPL37	+	5.7429	87.5312	3.81833	91.3496	1	1.5	45784	1.80021	73.7758	0.774516	74.5504	3.2	2	50181
Chr1	54702115	54704736	SSBP3-AS1	+	0.383767	-1.9767	92.7578	90.7811	0	0.1	2704	0.220628	3.24175	82.2061	85.4479	0.1	0.1	5111
Chr1	54691103	54872068	SSBP3	-	2.34356	79.1867	4.46878	83.6555	1.8	1.6	902431	0.91545	54.1208	1.95444	56.0753	5.4	1.6	669307
Chr1	55013806	55100417	ACOT11	+	0.227591	28.8641	57.8602	86.7242	1.1	1.1	100825	0.532523	21.3352	16.1427	37.4778	1.8	1.1	156036
Chr1	55074849	55089200	FAM151A	-	7.22871	19.5547	70.1597	89.7144	0.9	1	14211	0.0939585	7.39295	28.1498	35.5428	2.1	0.3	25735
Chr1	55107412	55175940	MROH7	+	0.251652	0.407299	86.5137	86.921	0	0.1	74028	0.00647036	2.02756	23.0525	25.0801	3.4	0.2	125113
Chr1	55107412	55208328	MROH7-TTC4	+	0.407208	-4.5735	86.5137	81.9402	0	0.1	116813	0.123846	5.97924	23.0525	29.0317	3.4	0.2	187776
Chr1	55181494	55208328	TTC4	+	2.83335	79.7796	12.1614	91.941	0.6	1.1	34219	3.18296	58.5124	5.54407	64.0565	2	1.5	53946
Chr1	55222570	55230226	PARS2	-	0.426369	82.5541	10.5011	93.0552	1	1.1	13984	0.665712	71.6362	5.70148	77.3377	6.1	1.1	26933
Chr1	55246751	55266941	TTC22	-	0.121531	52.5828	23.2504	75.8332	0.7	0.7	42702	2.23237	60.8878	0.291455	61.1793	4.4	3.3	194365
Chr1	55271735	55307937	C1orf177	+	0.0954246	-4.60818	87.5577	82.9496	0	0.1	42457	0.145985	-55.4076	87.2782	31.8706	0.1	0.1	82975
Chr1	55315299	55352921	DHCR24	-	65.6395	65.8365	2.7055	68.542	1.7	4.4	549066	11.1998	26.8277	0.193262	27.021	7.2	4.6	427262
Chr1	55446464	55457966	TMEM61	+	0	50.8632	31.2136	82.0768	0.8	0.6	6965	0.00647036	16.15	13.5786	29.7286	5.2	4.7	24300
Chr1	55464616	55474465	BSND	+	0.0854257	4.68908	81.6261	86.3152	0.4	0.3	6147	0.114443	-17.218	39.8266	22.6087	1	0.2	21204
Chr1	55505148	55530526	PCSK9	+	2.13831	67.7306	6.08045	73.8111	0.9	2.2	156369	2.18936	46.7028	0.423731	47.1266	5	3.8	86368
Chr1	55532031	55681039	USP24	-	7.24335	84.8784	4.40768	89.2861	1.1	1.8	189966	6.32015	63.8006	0.732287	64.5329	7.4	5.1	227723
Chr1	55681080	55683128	LOC100507634	+	0.0650972	81.0263	4.41588	85.4421	1.8	1.1	41450	0.198628	1.21414	0.738008	1.95214	7.4	2.4	67901
Chr1	55691313	55691396	MIR4422	+	0	NA	87.38	NA	0	0.1	0	0.00647036	NA	22.2957	NA	4.7	1.6	0
Chr1	56960418	57045257	PPAP2B	-	22.0851	61.8405	1.70083	63.5414	0.8	4.4	1299190	1.5137	44.5459	0.201786	44.7477	5.5	4.5	258330
Chr1	57110989	57181008	PRKAA2	+	0.535883	84.4403	5.30312	89.7434	1.8	1.7	25272	2.84644	62.0482	1.55049	63.5987	4.6	2.5	117199
Chr1	57184476	57285369	C1orf168	-	5.54918	38.4152	45.846	84.2612	3	3.1	467655	0.0736492	5.43963	5.34512	10.7847	2.3	2	103960
Chr1	57320442	57383894	C8A	+	84.7358	46.0142	33.2336	79.2479	1.5	3.4	994448	0.11907	6.24058	0	6.24058	0.1	0.1	71591
Chr1	57394882	57431813	C8B	-	181.696	24.4921	50.5369	75.029	0.1	4.6	469407	0.362196	6.26299	0	6.26299	5.6	1.5	37998
Chr1	58326214	58328786	DAB1-AS1	+	0	-2.47016	86.009	83.5389	3.8	1	1194	0.00647036	0	0	0	7.3	5.1	1170
Chr1	57463578	58716211	DAB1	-	1.04512	72.5592	8.76397	81.3232	0.5	2.8	1100818	0.00647036	-25.1977	29.9474	4.74969	0.1	0.1	1092888
Chr1	58946390	59012446	OMA1	-	9.25562	84.534	3.70898	88.2429	0.7	1.6	118840	8.33954	64.8482	0.488629	65.3368	5	1.7	76091
Chr1	59041094	59043166	TACSTD2	-	0.282755	11.7459	10.9033	22.6492	1	2.1	6705	0.00647036	-2.13256	89.1149	86.9823	0.1	0.1	3264
Chr1	59120410	59165747	MYSM1	-	4.14497	61.8856	29.2475	91.1331	0.3	1.2	49986	3.073	46.6694	26.0494	72.7188	1.7	1.4	65943
Chr1	59246462	59249785	JUN	-	7.26414	1.79776	0.566092	2.36385	1.9	2.9	174265	29.3043	0.635778	0.155485	0.791263	6.9	4.9	94101
Chr1	59250822	59365384	LINC01135	+	0.0798132	71.1853	1.11889	72.3042	3.9	1	408347	0.00647036	29.6846	0.408726	30.0933	6.1	1.1	565872
Chr1	59486147	59553919	LINC01358	+	0	17.8239	67.956	85.7799	1.4	1.8	126125	0.00647036	17.415	22.9862	40.4013	0.1	0.1	146082
Chr1	59597607	59612479	HSD52	-	0	54.3269	24.4879	78.8148	0.8	0.6	36672	0.00647036	22.2518	5.93217	28.1839	1.6	0.7	70394
Chr1	59762624	60228402	FGGY	+	19.1904	73.5554	12.034	85.5894	1.3	2	2005863	2.29047	46.0637	0.68	46.7437	4.4	2.6	760862
Chr1	60198898	60198968	MIR4711	-	0	NA	94.1747	NA	0	0.1	70	0.00647036	NA	57.2668	NA	0.1	0.1	284
Chr1	60238466	60254501	LOC101926944	+	0.743243	5.97887	84.253	90.2319	2.2	0.8	5174	0.00647036	-16.4359	27.9625	11.5266	0.1	0.1	18039
Chr1	60280532	60342050	HOOK1	+	14.9794	76.4703	11.3181	87.7884	0.8	2.5	141243	1.58466	34.86	6.58844	41.4484	3.7	2.8	39333
Chr1	60358979	60392423	CYP2J2	-	19.4763	73.1163	11.3209	84.4372	0.8	1.6	110874	0.660945	16.6217	1.1893	17.811	4.7	4	35213
Chr1	60456065	60539442	C1orf87	-	0	50.4584	30.6708	81.1292	0.5	0.9	27713	0.00647036	-20.268	25.1061	4.83809	0.1	0.1	68908
Chr1	61125302	61291256	LOC101926964	-	0.201487	1.23981	76.8657	78.1055	0	0.1	52536	0.342427	5.37456	0	5.37456	6.2	5.1	137470
Chr1	61405915	61436448	NFIA-AS2	-	0	26.8603	52.7567	79.6169	1.5	2.2	12300	0.00647036	5.8966	2.77588	8.67248	7	2	32556
Chr1	61542945	61928460	NFIA	+	19.0305	75.1484	2.19684	77.3453	1.1	1.7	2108456	1.7061	52.5505	1.27083	53.8213	6.6	5.1	733598
Chr1	61714616	61719190	NFIA-AS1	-	0.262111	30.0837	63.0729	93.1566	2.3	1	17791	0.00647036	68.6517	1.42857	70.0803	3.5	1.8	5295
Chr1	62119913	62121800	MGC34796	+	0.0375635	2.23968	93.5937	95.8333	0	0.1	986	0.124872	-5.06709	65.0671	60	0.1	0.1	3495
Chr1	62146718	62191095	TM2D1	-	1.82221	81.8061	11.4974	93.3035	0.7	1.1	68789	2.13373	61.343	10.3782	71.7212	2.1	1.3	220358
Chr1	62208148	62629591	INADL	+	9.14066	86.2983	5.76177	92.06	0.9	1.3	272110	4.82044	66.2536	2.81538	69.069	3.9	2.2	590879
Chr1	62660473	62678001	L1TD1	+	0.284719	48.9502	34.4754	83.4256	0.4	1.5	7214	0.36154	-23.1559	70.8625	47.7066	0.1	0.1	18864
Chr1	62701836	62785083	KANK4	-	0.735139	62.2644	23.0913	85.3557	0.5	1.4	38357	0.144558	-12.313	36.4479	24.1348	0.1	0.1	121586
Chr1	62901974	62917475	USP1	+	6.11917	45.3387	4.83101	50.1697	0.7	2.8	109801	16.3992	29.2987	3.67819	32.9769	5.8	5.1	122908
Chr1	63063157	63071976	ANGPTL3	+	162.902	26.4188	43.8406	70.2594	1.7	4	67740	0.564542	24.3544	4.7625	29.1169	5.9	3.6	4144
Chr1	62920396	63154039	DOCK7	-	3.71455	87.0274	1.90889	88.9363	1.5	1.5	365780	3.06919	67.8705	0.123169	67.9936	4.8	2	240558
Chr1	63249776	63330941	ATG4C	+	3.01795	69.6838	23.2263	92.9101	0.9	1.4	36359	2.55814	15.4169	43.1634	58.5804	2	1.6	55111
Chr1	63624753	63782901	LINC00466	-	0.240266	70.559	10.5937	81.1528	5	0.6	46007	0.263875	-12.1056	29.8723	17.7666	1.5	0.3	146374
Chr1	63788729	63790797	FOXD3	+	0.0484537	3.45414	10.3718	13.826	1.4	0.1	1391	0.00647036	-1.51654	90.65	89.1335	0.1	0.1	1339
Chr1	63792595	63792655	MIR6068	-	0	NA	7.62281	NA	1	2.3	60	0.00647036	NA	24.8255	NA	1	0.9	82
Chr1	63833260	63904233	ALG6	+	0.68512	86.8226	7.61475	94.4373	0.6	1.1	37601	0.611488	63.7692	7.21939	70.9886	2.1	1.6	86945
Chr1	63906440	63988944	ITGB3BP	-	2.06943	87.4672	2.41722	89.8844	1.2	1.9	34594	12.3543	68.5795	0.479314	69.0588	4.4	3	66840
Chr1	63989012	64038364	EFCAB7	+	0.748151	90.4199	2.41722	92.8371	1.8	1.2	41560	1.45925	63.3129	0.479314	63.7922	4.3	1.4	65103
Chr1	64014650	64016307	DLEU2L	+	0.290693	9.3825	90.6175	100	2.9	1.6	277	0.661012	-43.9963	74.7663	30.77	3.7	0.7	1427
Chr1	64058946	64125916	PGM1	+	46.259	74.5579	3.60889	78.1668	1.1	2	427536	3.76337	54.8129	0.512126	55.325	3.2	2.1	185593
Chr1	64239689	64647179	ROR1	+	0.161384	77.3363	3.52439	80.8606	0.9	1.9	180206	3.19995	57.1677	1.21025	58.378	6	4.2	647919
Chr1	64560124	64579474	ROR1-AS1	-	2.41065	5.63442	77.2354	82.8698	1.6	0.2	8159	1.54926	7.88111	59.8904	67.7715	1.6	0.1	24985
Chr1	64669489	64710027	UBE2U	+	0	-10.14	90.3964	80.2564	0	0.1	10526	0.00647036	-29.38	62.1567	32.7767	0.1	0.1	31388
Chr1	64936475	65158741	CACHD1	+	0.230104	81.8502	3.68971	85.5399	1.5	1.6	201170	0.315892	-1.64874	24.1496	22.5008	1.5	0.3	255214
Chr1	65045529	65045604	MIR4794	+	0	NA	90.6506	NA	0	0.1	0	0.00647036	NA	4.615	NA	5.1	4	56
Chr1	65210777	65298914	RAVER2	+	0.481698	83.0702	4.82757	87.8978	1.3	1.4	44192	0.242166	-39.7693	62.7965	23.0271	0.1	0.1	62126
Chr1	65298905	65432187	JAK1	-	16.4568	80.1787	4.88015	85.0589	1.1	1.6	672115	7.10904	63.4635	0.482479	63.946	3.6	2.4	534948
Chr1	65445259	65468159	LINC01359	-	0.225588	73.4175	14.1231	87.5407	1.3	0.5	89111	0.132649	46.5586	1.42412	47.9827	2.7	1.4	42374
Chr1	65523437	65523525	MIR3671	-	0	NA	93.5761	NA	0	0.1	172	0.00647036	NA	43.683	NA	0.1	0.1	0
Chr1	65524116	65524191	MIR101-1	-	0	NA	85.6382	NA	0	0.1	123	0.00647036	NA	38.4935	NA	0.1	0.1	25
Chr1	65613231	65697828	AK4	+	15.4585	67.0251	5.82757	72.8527	0.6	3.4	478592	2.09051	31.1706	1.82618	32.9968	3.9	3.3	155612
Chr1	65730376	65881552	DNAJC6	+	0.170677	57.6403	16.49	74.1303	0.6	2.2	55840	0.702854	26.2016	5.09278	31.2944	4.6	3.9	163487
Chr1	65886130	65901690	LEPROT	+	8.42104	78.7839	2.98147	81.7653	1.1	1.9	111382	4.41524	51.4005	0.996136	52.3966	3.6	2.1	75918
Chr1	65886334	66103176	LEPR	+	19.4407	76.7743	2.1715	78.9458	1.3	1.7	431311	0.721349	28.563	0.502667	29.0657	3.6	1.9	227328
Chr1	66258192	66840262	PDE4B	+	0.987224	70.3041	6.8084	77.1125	1.1	1.9	694615	0.187625	-24.1987	39.9355	15.7367	0.1	0.1	630589
Chr1	66999824	67210768	SGIP1	+	0.104327	64.5147	18.8818	83.3965	1.3	0.7	131287	0.00647036	-17.3987	27.1531	9.75438	0.1	0.1	195191
Chr1	67094122	67094200	MIR3117	+	0	NA	85.168	NA	0	0.1	0	0.00647036	NA	1.38889	NA	6.2	1.2	17
Chr1	67218139	67244730	TCTEX1D1	+	0.598357	67.7525	21.2519	89.0044	2	1.2	16686	0.00647036	-31.0927	36.6941	5.6014	0.1	0.1	21605
Chr1	67263423	67266942	INSL5	-	0	-7.21776	88.5691	81.3514	0	0.1	796	0.00647036	-3.24056	3.24056	0	7.7	5.1	2659
Chr1	67278571	67390570	WDR78	-	0.959691	81.1875	8.26117	89.4487	1.4	1	49268	0.467334	27.3717	0.698759	28.0704	3.2	1	99941
Chr1	67390577	67454302	MIER1	+	13.3268	57.7255	8.28581	66.0113	0.9	1.5	305622	8.53215	42.9401	0.693973	43.6341	3.1	2.2	189229
Chr1	67465014	67520080	SLC35D1	-	13.3403	79.4359	3.97871	83.4146	0.8	3.1	149457	1.29912	61.7451	3.4785	65.2236	5.6	4.7	94814
Chr1	67557858	67600654	C1orf141	-	0.101736	26.0371	56.8079	82.845	1.1	0.7	9751	0.181748	-18.922	46.8227	27.9008	5.1	0.1	41992
Chr1	67632168	67725650	IL23R	+	0.129772	-1.80408	85.9098	84.1057	0.2	0.5	52874	0.233057	-17.0946	39.352	22.2574	0.1	0.1	88683
Chr1	67773046	67862583	IL12RB2	+	0.337425	70.6906	16.6836	87.3742	0.3	1.4	103082	0.122039	-29.2779	70.6927	41.4148	0.1	0.1	111380
Chr1	67873492	67896123	SERBP1	-	24.297	74.5051	1.3194	75.8245	1.3	3.4	77672	37.9492	45.4697	0.130145	45.5998	6.5	3.7	71281
Chr1	68150859	68154021	GADD45A	+	53.3495	-0.182263	3.83638	3.65412	1.9	3	140068	6.63208	-1.19594	1.54709	0.35115	6	3.2	145136
Chr1	68297970	68668670	GNG12-AS1	+	0.220676	78.7946	3.54895	82.3436	1.9	1.7	415806	0.186345	26.0634	0	26.0634	4.3	2.1	507419
Chr1	68167148	68299155	GNG12	-	6.75913	63.5333	16.1034	79.6368	0.4	3.2	685919	7.94704	42.575	3.80045	46.3755	4.1	3.4	608954
Chr1	68511644	68516460	DIRAS3	-	0.895516	36.257	49.2115	85.4685	1.2	1	32538	0.00647036	-1.14424	44.9431	43.7988	0.1	0.1	6418
Chr1	68649200	68649293	MIR1262	-	0	NA	90.4964	NA	0	0.1	0	0.00647036	NA	75.0425	NA	0.1	0.1	72
Chr1	68564141	68698284	WLS	-	4.04823	74.5103	4.65688	79.1672	0.8	2.5	239781	2.3505	36.4753	0.937108	37.4124	4.7	2.7	235589
Chr1	68894506	68915642	RPE65	-	0	15.6435	58.33	73.9735	0.9	1.9	6965	0.00647036	16.0529	0	16.0529	6.8	1.8	15257
Chr1	68962358	69004310	DEPDC1-AS1	+	0	73.5754	6.36185	79.9372	0.7	1.3	12486	0.152016	16.9129	0.0738095	16.9867	6.4	5.1	47173
Chr1	68939834	68962904	DEPDC1	-	0.0885822	87.788	4.85549	92.6435	0.6	1.3	5989	5.62926	73.1473	0.538941	73.6863	6.9	1.9	42192
Chr1	70225857	70589171	LRRC7	+	0.138444	-5.48337	76.4969	71.0135	0	0.1	110047	0.0755184	6.64325	0	6.64325	6.8	1.8	220621
Chr1	70385004	70386000	PIN1P1	+	0.0894607	NA	87.3547	NA	0	0.1	398	0.00647036	NA	17.3211	NA	1.9	0.2	1240
Chr1	70610484	70671361	LRRC40	-	5.19029	92.3059	2.88242	95.1883	1.2	1.6	58537	2.97306	67.2401	0.553966	67.7941	4.6	2.7	55056
Chr1	70671364	70717701	SRSF11	+	24.8489	68.9005	2.88242	71.7829	1.5	1.3	155339	39.3857	52.1835	0.553966	52.7375	4.6	2	116850
Chr1	70724684	70820417	ANKRD13C	-	2.3786	84.9243	6.43665	91.3609	0.6	1.9	130307	3.86239	73.7221	1.8397	75.5618	4.2	2.2	166376
Chr1	70820492	70833705	HHLA3	+	1.96838	82.903	7.58881	90.4918	1.9	0.6	28803	1.2326	50.9253	2.4542	53.3796	4.2	2	42212
Chr1	70876900	70905534	CTH	+	18.8375	80.661	2.91395	83.575	1.2	2.8	114940	0.758094	47.6691	0.871538	48.5407	4.2	2.9	60040
Chr1	71512188	71532865	ZRANB2-AS1	+	0.251393	29.0966	28.8341	57.9307	0.2	2.3	14162	0.190276	-50.7244	80.8512	30.1268	0.1	0.1	23581
Chr1	71318035	71513491	PTGER3	-	0.1178	59.4016	8.79016	68.1918	0.9	1.6	81789	0.281236	-29.0813	52.949	23.8677	2.4	0.4	297866
Chr1	71533313	71533399	MIR186	-	0	NA	91.7343	NA	2.8	1.5	0	0.00647036	NA	57.84	NA	5.1	4.1	106
Chr1	71528973	71546972	ZRANB2	-	13.6097	74.4503	11.9795	86.4298	0.6	2	42400	17.8576	58.9265	6.56966	65.4962	2.4	2	38598
Chr1	71547006	71703406	ZRANB2-AS2	+	0.401938	67.6459	11.9795	79.6254	2	0.7	55511	0.344676	0.579748	6.56966	7.1494	2.4	0.5	114032
Chr1	72259914	72302695	NEGR1-IT1	-	0	-4.91273	78.1415	73.2288	0	0.1	13134	0.00647036	-14.3334	19.0467	4.71329	0.1	0.1	29914
Chr1	71868624	72748277	NEGR1	-	0.142705	67.0346	6.13167	73.1662	3.1	1.9	251934	0.00647036	-0.366675	6.84096	6.47429	0.1	0.1	477212
Chr1	73771852	73804560	LINC01360	+	0.126887	23.5621	54.76	78.3221	1.1	2.1	13731	0.0719668	NA	NA	6.14357	4	1	18036
Chr1	74491701	74663871	LRRIQ3	-	0.115634	60.622	13.8601	74.4821	1.6	0.8	59570	0.357779	NA	7.05241	9.48362	1.9	0.7	97993
Chr1	74663895	74674386	FPGT	+	2.71908	75.4156	13.8601	89.2757	0.7	1.7	26732	2.27595	NA	7.05241	76.9613	1.9	1.3	16544
Chr1	74663895	75010116	FPGT-TNNI3K	+	0.247399	63.7526	13.8601	77.6127	0.7	1.7	134192	0.166337	NA	7.05241	19.2672	1.9	1.3	245669
Chr1	74701070	75010116	TNNI3K	+	0.0352737	-8.10193	84.8978	76.7958	0	0.1	101452	0.0556731	NA	0	15.41	7.4	2.8	210404
Chr1	75033794	75139422	ERICH3	-	0.19956	64.7859	15.2374	80.0233	0.7	1	87560	0.00647036	NA	23.4322	4.19887	0.1	0.1	59753
Chr1	75198835	75232360	TYW3	+	3.66757	88.4766	1.11835	89.5949	2.3	1.3	55581	4.52365	NA	0.616154	74.3481	6.4	2.7	72784
Chr1	75171171	75199092	CRYZ	-	45.8646	79.9858	2.21442	82.2003	1	2.7	206888	22.1354	NA	0.606818	60.1215	6.4	4.1	86848
Chr1	75594118	75627218	LHX8	+	0	8.02781	13.0172	21.045	2.9	5.1	11741	0.563963	NA	47.5399	59.5428	0.1	0.1	23578
Chr1	75667815	76076799	SLC44A5	-	0.0576973	1.89241	69.6429	71.5353	0	0.1	124837	1.11168	NA	0	29.1666	6.7	5.1	334911
Chr1	76190031	76229363	ACADM	+	47.0595	80.9346	8.58771	89.5224	0.7	2.3	96167	4.00016	NA	3.4754	66.3397	5	4.3	70724
Chr1	76251878	76260775	RABGGTB	+	11.3441	56.7389	20.9948	77.7337	0.7	2.1	67560	17.3607	NA	15.4516	20.946	5.7	5.1	48579
Chr1	76252756	76252834	SNORD45C	+	38.206	NA	4.5245	NA	1.6	1.3	475	17.1024	NA	0.219298	NA	6.3	4.8	938
Chr1	76253573	76253657	SNORD45A	+	373.228	NA	29.8092	NA	2.4	0.6	451	202.871	NA	3.03045	NA	6.3	4	245
Chr1	76255161	76255232	SNORD45B	+	293.604	NA	70.8812	NA	0	0.1	15	24.7482	NA	2.08375	NA	6.2	2.3	177
Chr1	76262555	76378923	MSH4	+	0.0747875	-5.66633	86.9491	81.2828	0.5	0.8	34632	0.100779	NA	8.05944	25.0666	3.1	1.6	86647
Chr1	76384557	76398116	ASB17	-	0.0663113	3.9632	75.4943	79.4575	0	0.1	3582	0.00647036	NA	6.36364	15.6209	0.1	0.1	7096
Chr1	76540388	77096669	ST6GALNAC3	+	1.58199	64.4913	10.6817	75.173	0.9	1.5	272287	0.075086	NA	12.9175	7.32915	0.1	0.1	469500
Chr1	77333185	77529737	ST6GALNAC5	+	0.0488343	64.888	7.0681	71.9561	0.6	2.2	60808	0.0925841	NA	35.2051	14.5996	0.1	0.1	174819
Chr1	77525827	77525887	MIR7156	+	0	NA	62.5121	NA	1.3	3.3	37	0.00647036	NA	4	NA	5	0.2	0
Chr1	77554666	77685132	PIGK	-	4.56151	87.7324	2.01461	89.7471	1.7	1.2	59058	6.88943	NA	0	66.3047	4.2	2.8	115012
Chr1	77747661	78025654	AK5	+	0.151646	72.2185	5.37555	77.594	0.6	2.6	116274	0.51819	NA	78.7773	41.4722	0.1	0.1	759047
Chr1	78030189	78148343	ZZZ3	-	10.094	89.0488	2.60896	91.6578	1.8	1.4	174074	10.9919	NA	0.42381	69.8474	6.8	4.9	196883
Chr1	78161673	78225564	USP33	-	10.7575	82.698	8.12792	90.8259	0.5	3.3	76907	15.9978	NA	4.80176	70.9137	4.3	3.4	99682
Chr1	78245308	78345225	FAM73A	+	2.57184	69.5763	23.4645	93.0409	0.5	1.3	68301	2.88998	NA	8.125	74.3364	4	3.2	116163
Chr1	78354199	78409578	NEXN	+	3.64219	80.755	9.4264	90.1814	0.6	1.4	34132	1.36709	NA	5.68864	59.6833	3.8	3.2	67580
Chr1	78347032	78355224	NEXN-AS1	-	2.96032	76.9907	8.11603	85.1067	0.3	1.8	18567	1.19721	NA	0.265851	68.3662	3.7	1.7	33182
Chr1	78413590	78444777	FUBP1	-	10.7152	83.1813	1.50509	84.6864	1.4	1.9	124119	43.0495	NA	0.18073	55.8349	8.3	3.3	94548
Chr1	78470635	78482995	DNAJB4	+	15.3474	93.5197	0.4444	93.9641	1.8	2.1	69016	20.9831	NA	0.649545	64.5314	6.6	4.4	30030
Chr1	78511588	78603112	GIPC2	+	8.51159	83.0686	4.29438	87.363	1.1	2.3	245067	0.18869	NA	8.35337	35.3131	4.3	3.1	99831
Chr1	78695282	78835147	MGC27382	+	1.05787	4.18253	76.1992	80.3817	0	0.1	100090	0.00647036	NA	0	6.07209	0.1	0.1	117769
Chr1	78956727	79006386	PTGFR	+	0.143079	77.4298	7.62406	85.0538	0.8	1.5	18673	0.00647036	NA	8.2888	6.77672	0.1	0.1	37575
Chr1	79086087	79111830	IFI44L	+	2.43379	46.5666	36.7588	83.3255	3.8	1.5	26062	0.194184	NA	6.31579	7.68264	0.1	0.1	13921
Chr1	79115476	79129763	IFI44	+	8.67494	24.9896	54.9533	79.9429	1	1.8	25657	0.795517	NA	0	6.80524	7	2	11763
Chr1	79355448	79472495	ELTD1	-	3.10134	48.7173	20.2713	68.9886	0.4	0.9	46228	0.00647036	NA	69.3953	11.2551	0.1	0.1	84849
Chr1	82266081	82458107	LPHN2	+	9.56558	68.9609	4.07304	73.0339	0.9	5	422658	0.00647036	NA	22.1512	5.2376	0.1	0.1	105049
Chr1	83439565	83451891	LINC01361	-	0.0507584	-7.65836	85.7806	78.1222	0	0.1	4179	0.00647036	NA	5.61722	5.90438	7.1	2.1	9467
Chr1	84267198	84326229	LOC101927560	-	1.54743	74.0839	11.9389	86.0228	1	0.9	147263	0.682182	NA	4.37626	21.5415	2	1	48742
Chr1	84041470	84326679	LOC101927587	-	0.8861	69.9609	14.8036	84.7645	0.6	1.3	390214	0.195064	NA	5.47462	10.8618	2.2	1.5	234514
Chr1	84259597	84379059	MIR548AP	-	0	-6.10422	84.0625	77.9583	0	0.1	252332	31.27	NA	25.9267	26.1048	0.1	0.1	86647
Chr1	84335056	84464833	TTLL7	-	0.657822	82.1009	5.71204	87.8129	1	1.1	94720	0.84897	NA	1.74808	51.5255	2.2	1.4	89820
Chr1	84543744	84704181	PRKACB	+	7.50784	87.0722	2.22514	89.2974	1	1.3	95323	4.2794	NA	0.202828	57.3064	3.9	2.2	181485
Chr1	84764048	84816481	SAMD13	+	0.109261	69.9113	7.41401	77.3253	0.4	1.7	47392	0.341361	NA	0.909032	29.3478	7	5.1	100493
Chr1	84830640	84863576	UOX	-	0	1.98404	79.9559	81.94	0	0.1	12537	0.00647036	NA	28.8822	43.9684	3.2	0.9	58704
Chr1	84864214	84880691	DNASE2B	+	0.0683865	-2.12763	78.4779	76.3503	0	0.1	19282	0.138716	NA	19.4537	37.5488	3	1.6	56131
Chr1	84944919	84964033	RPF1	+	9.99614	72.3358	16.0192	88.355	0.3	1.5	68197	11.9764	NA	6.85254	69.6031	3.1	2.6	54004
Chr1	84964005	84972262	GNG5	-	4.15384	55.6935	7.81655	63.5101	0.8	2.8	178720	1.65754	NA	3.26365	32.6087	5.3	3.7	69690
Chr1	85018803	85040163	CTBS	-	8.30263	82.33	9.35234	91.6823	0.6	1.8	138905	0.903203	NA	9.49391	76.8801	2.9	1.5	40349
Chr1	85093912	85100703	C1orf180	-	0.128246	3.50181	78.1969	81.6987	1.3	4.9	2587	0.0873953	NA	43.8567	27.5712	3.8	2.6	8159
Chr1	85109389	85156240	SSX2IP	-	2.79958	86.9198	4.83665	91.7564	1	1.6	41317	4.76349	NA	1.91794	67.438	3.6	1.8	59984
Chr1	85279085	85358896	LPAR3	-	0.0944854	73.1022	9.94309	83.0453	0.8	0.9	52238	0.00647036	NA	66.9922	21.3404	0.1	0.1	82531
Chr1	85391265	85462796	MCOLN2	-	0.124834	71.8457	6.82574	78.6715	2.3	1	41610	0.163647	NA	65.3745	16.1461	0.1	0.1	83481
Chr1	85483764	85514223	MCOLN3	-	0.0701349	74.0569	4.80983	78.8667	2.3	1.6	9751	0.0975009	NA	6.14681	15.8768	3	2.1	32050
Chr1	85527980	85598821	WDR63	+	0	52.9819	30.7923	83.7741	0.9	0.8	36784	0.00647036	NA	33.8744	17.0387	0.1	0.1	63188
Chr1	85599476	85599556	MIR4423	+	0	NA	79.202	NA	0.8	1.3	87	0.00647036	NA	25	NA	0.1	0.1	0
Chr1	85623355	85666728	SYDE2	-	3.10364	86.5426	1.18093	87.7235	1.9	2.6	71688	0.678653	NA	0.772922	59.7499	6.1	2.4	35091
Chr1	85715636	85725355	C1orf52	-	2.15595	77.5088	7.79752	85.3064	0.8	1.3	17212	3.40239	NA	3.18149	57.2964	2.5	1.7	33667
Chr1	85742040	85743771	LOC646626	+	0.120883	87.2311	4.08122	91.3124	1.3	1	36083	0.226368	1.06041	0.342444	1.40286	4.3	2.1	43213
Chr1	85731459	85742587	BCL10	-	1.38611	67.3748	10.8255	78.2003	0.4	1.9	82358	2.53125	62.5209	0.411	62.9319	4.2	2.8	75824
Chr1	85784167	86044046	DDAH1	-	13.4856	47.439	22.5936	70.0326	0	2.7	901262	1.42525	28.2841	2.31275	30.5968	3.7	2.9	363932
Chr1	86046443	86049648	CYR61	+	9.2226	77.437	7.47304	84.91	1	1.2	51009	0.463547	35.6617	3.46107	39.1228	2.9	1.9	18552
Chr1	86115105	86174116	ZNHIT6	-	2.02621	73.3076	20.3117	93.6193	0.5	1.4	40381	2.64285	71.7815	0.0604167	71.842	3.5	2	103025
Chr1	86194915	86622121	COL24A1	-	0.0392613	66.9919	4.624	71.6159	1	2.1	121257	0.367076	19.2183	9.54867	28.767	1.3	0.9	322975
Chr1	86823314	86823370	MIR7856	-	0	NA	87.1152	NA	1.2	5.1	0	0.00647036	NA	0	NA	8.1	5.1	0
Chr1	86812506	86862025	ODF2L	-	5.00939	73.4558	10.0062	83.462	0.8	1.1	61042	1.59372	-31.9701	46.126	14.1558	0.1	0.1	28901
Chr1	86889768	86922240	CLCA2	+	0	-0.857302	74.6144	73.7571	0	0.1	26930	0.00647036	-16.8733	32.4988	15.6254	4	0.9	23995
Chr1	86934525	86965974	CLCA1	+	0	10.1372	64.1268	74.264	1.1	0.2	11940	0.00647036	8.9187	2.85714	11.7758	4.8	4.6	32273
Chr1	87012758	87046432	CLCA4	+	0	8.69636	68.7805	77.4768	0	0.1	9552	0.00647036	30.5109	7.444	37.9549	8	3	23740
Chr1	87099958	87121059	CLCA3P	+	0	16.0685	62.9721	79.0406	3	1.6	3781	0.00647036	13.3858	11.7586	25.1444	7.2	3.8	15501
Chr1	87170252	87213867	SH3GLB1	+	6.72595	85.0434	4.00758	89.051	0.8	2.5	127271	5.61599	63.5694	1.74089	65.3103	4.2	3	104863
Chr1	87328127	87380107	43358	-	18.1324	90.2036	1.72766	91.9312	2.2	2.2	98320	20.3936	74.1713	0.771609	74.9429	4.9	2.3	91181
Chr1	87380334	87575681	HS2ST1	+	8.17639	87.3213	1.86493	89.1863	2.3	2.1	177193	7.6981	63.7712	0.807337	64.5785	4.9	2.5	245309
Chr1	87595447	87634886	LINC01140	+	0.109321	-8.38692	73.5744	65.1875	0.5	0.5	24322	0.00647036	-1.30918	26.5943	25.2851	0.1	0.1	61474
Chr1	87678351	87717014	LOC101927844	+	0.330331	1.08179	78.483	79.5648	4.6	0.6	21789	0.397422	-4.31229	25.0185	20.7062	0.1	0.1	54775
Chr1	87794150	87814607	LMO4	+	2.08997	33.3503	6.09712	39.4474	0.7	4.1	161785	3.82628	20.1256	2.60966	22.7353	5	4.2	159360
Chr1	87819209	87837338	LINC01364	-	0.0761707	-5.7767	91.1518	85.3751	0	0.1	21094	0.00647036	-24.4047	67.9277	43.523	0.1	0.1	24577
Chr1	89149921	89301938	PKN2	+	7.34516	91.0871	1.84061	92.9277	1.3	2.2	159596	8.35158	69.9212	0.200642	70.1218	3.9	2.5	264388
Chr1	89003195	89150887	PKN2-AS1	-	0.239768	78.8262	1.06884	79.895	1.1	2.3	152430	0.200782	23.5323	0.0941085	23.6264	4	2.5	264872
Chr1	89318320	89357301	GTF2B	-	10.8745	78.486	10.9305	89.4165	1.1	1.5	71481	8.10009	62.129	7.4692	69.5982	3.9	1.8	81547
Chr1	89401455	89458643	CCBL2	-	6.04539	84.8252	4.08228	88.9075	1.4	1.4	183158	6.68347	53.9347	4.19695	58.1316	3.5	2.6	131203
Chr1	89445138	89458643	RBMXL1	-	1.88423	79.6235	4.08228	83.7058	1.4	1.4	111497	1.87943	26.0823	4.19695	30.2793	3.5	2.6	85121
Chr1	89472359	89488549	GBP3	-	8.23286	72.2609	18.333	90.5939	1.6	1.9	49204	9.16685	55.8158	7.1425	62.9583	6.6	1.6	63961
Chr1	89517986	89531043	GBP1	-	10.7411	64.22	21.5385	85.7585	1.4	2.4	85212	1.57011	47.0729	6.6975	53.7704	5.1	3.2	20188
Chr1	89571815	89591842	GBP2	-	3.18051	30.122	61.2927	91.4147	0.6	1.8	58089	4.17732	8.03799	47.4057	55.4437	3.3	2.8	38912
Chr1	89597433	89641723	GBP7	-	27.6061	25.9052	56.2829	82.1881	0.6	3.7	174569	0.117507	22.5191	8.33333	30.8525	7.1	3.9	47317
Chr1	89646830	89664633	GBP4	-	4.39238	76.1959	5.43093	81.6269	1.9	1.6	59557	0.38139	25.1808	4.95513	30.1359	6.5	1.5	20223
Chr1	89724633	89738544	GBP5	-	2.31395	-6.56779	85.6225	79.0547	0	0.1	39699	0.257261	-45.4087	64.9213	19.5126	0.5	0.1	14464
Chr1	89754940	89756045	LOC729930	-	0.131525	-7.99167	92.9917	85	0	0.1	822	0.00647036	0	0	0	6.4	1.4	1401
Chr1	89829435	89853719	GBP6	+	0.174547	23.023	61.052	84.075	0.5	1.9	7782	0.134224	-13.1296	24.4071	11.2775	0.1	0.1	17525
Chr1	89873237	89890493	GBP1P1	+	0.566202	41.2428	36.6073	77.85	1.6	1.7	26861	0.142824	14.2656	11.5878	25.8534	6.1	1.1	6317
Chr1	89990396	90063420	LRRC8B	+	0.396894	84.04	3.25705	87.297	1	1.2	136480	0.857385	63.9223	0.375179	64.2975	2.6	1.1	81011
Chr1	90090407	90098453	FLJ27354	-	0.0820068	80.4044	6.77672	87.1811	1.8	1.1	17199	0.00647036	-60.2797	78.1794	17.8996	0.1	0.1	7571
Chr1	90098643	90185094	LRRC8C	+	0.359824	76.6382	4.62221	81.2604	1.2	1.7	115366	0.00647036	-59.64	76.6672	17.0272	0.1	0.1	59818
Chr1	90286572	90401989	LRRC8D	+	4.25017	78.2121	2.58067	80.7928	1	2.9	372311	3.78836	55.699	0.600868	56.2999	4.7	3.4	258349
Chr1	90458823	90460525	GEMIN8P4	-	0.486804	82.1919	12.4199	94.6119	2	0.5	13469	0.736869	82.0796	7.45567	89.5353	2.6	0.5	18884
Chr1	90460677	90494094	ZNF326	+	16.6568	75.0089	11.6721	86.6809	0.6	1.9	86934	10.2942	57.459	6.65685	64.1159	2.6	2.1	70311
Chr1	91177578	91182794	BARHL2	-	0.0832294	-0.530355	9.453	8.92264	2	5.1	2189	0.00647036	-63.4755	68.758	5.28252	0.1	0.1	5836
Chr1	91380856	91487812	ZNF644	-	10.1696	85.7133	4.78776	90.501	0.7	2.1	209385	7.96269	62.13	0.572795	62.7028	5.1	3.9	191706
Chr1	91726322	91870426	HFM1	-	0.108008	73.3791	6.0694	79.4485	0.3	1.3	112774	0.00647036	8.78357	8.03866	16.8222	1	0.9	126577
Chr1	91966403	91991321	CDC7	+	0.354413	80.7071	3.4113	84.1184	0.7	1.7	54426	4.572	52.8776	3.20506	56.0827	3	2.5	51901
Chr1	92145899	92371559	TGFBR3	-	4.73338	-19.6333	96.0997	76.4663	0	0.1	1273720	1.54973	-35.2282	69.5789	34.3506	0.1	0.1	713245
Chr1	92414927	92479985	BRDT	+	0.219363	1.26362	86.7657	88.0294	0	0.1	18121	0.179574	-29.8963	63.7494	33.8531	0.1	0.1	64671
Chr1	92495532	92529093	EPHX4	+	0	70.5026	16.9139	87.4165	0.5	1.5	11542	0.00647036	-56.581	77.6496	21.0685	0.1	0.1	25827
Chr1	92539992	92541029	SETSIP	-	0.863909	NA	85.9314	NA	0	0.1	199	3.32066	NA	28.7609	NA	5.1	4.7	1171
Chr1	92545861	92613401	BTBD8	+	0.71024	81.1235	12.1667	93.2902	0.6	1.4	31715	0.755816	33.2557	10.5148	43.7705	1.7	1.2	83138
Chr1	92632608	92650280	KIAA1107	+	0.585419	2.16734	91.7248	93.8921	3.6	1.1	3980	0.723332	10.9927	20.7594	31.7522	4.6	4.2	12425
Chr1	92683572	92711367	C1orf146	+	0	-6.48473	90.1486	83.6639	0	0.1	7363	0.00647036	-22.9278	53.7247	30.797	0.1	0.1	24727
Chr1	92764521	92853732	RPAP2	+	3.99845	89.0935	4.26817	93.3617	1.2	1.1	57841	4.20076	75.4957	0.521367	76.0171	2.7	1.2	100947
Chr1	92711954	92764566	GLMN	-	0.792529	88.0811	4.26817	92.3493	1	1.3	43153	2.25412	74.9109	0.521367	75.4323	2.7	1.6	62575
Chr1	92940317	92952433	GFI1	-	0.0966944	10.3357	8.6068	18.9425	0.3	5.1	13877	0.236454	49.3832	5.43195	54.8152	3.3	3	42465
Chr1	92974252	93257961	EVI5	-	11.0833	15.6407	68.5092	84.1499	3	1.4	303276	3.20632	57.2527	6.13538	63.3881	4.2	1.8	340331
Chr1	93297593	93307481	RPL5	+	270.091	70.237	7.51391	77.7509	0.6	2	75441	616.805	27.2086	3.68288	30.8915	3.6	2.9	75164
Chr1	93302845	93302940	SNORD21	+	4604.63	NA	88.9887	NA	0	0.1	190	2594.51	NA	40.9525	NA	0.1	0.1	116
Chr1	93306275	93306408	SNORA66	+	635.312	NA	67.9977	NA	3	1.1	161	250.851	NA	28.6236	NA	5.7	0.7	149
Chr1	93298285	93427079	FAM69A	-	4.74756	79.8202	2.50963	82.3299	1.4	1.9	360416	3.23493	49.8954	0.910905	50.8063	6.3	5.1	331078
Chr1	93544791	93604638	MTF2	+	3.87146	91.0252	0.99375	92.019	0.9	2.9	94204	7.04854	73.4992	0.622756	74.1219	3.9	3.1	109023
Chr1	93615298	93646246	TMED5	-	17.4078	77.7046	3.16865	80.8732	0.9	3.4	188349	11.9458	60.9623	0.609817	61.5722	5.3	3.7	121062
Chr1	93646272	93744287	CCDC18	+	2.59864	85.5141	3.83099	89.3451	3.3	1	96926	5.96765	67.3179	0.736864	68.0548	5.2	1.6	199779
Chr1	93775665	93811368	LOC100131564	-	1.22256	88.1847	0.678011	88.8627	3.2	1.1	57633	0.905969	56.2009	0.330247	56.5312	5.9	0.9	96709
Chr1	93811477	93828148	DR1	+	5.56167	68.1889	0.663351	68.8523	1.1	3.2	66408	12.0912	48.1073	0.391576	48.4989	6	5.1	73588
Chr1	93913687	94020218	FNBP1L	+	7.02845	85.0324	1.54674	86.5792	1.2	2.3	116954	11.4695	56.8546	0.244974	57.0996	4	2.7	181412
Chr1	94057524	94065587	LOC100129046	+	1.14907	46.6784	34.9626	81.641	0.9	1.7	118277	0.705208	30.4117	0.3094	30.7211	5.7	4.5	142338
Chr1	94312387	94312467	MIR760	+	0	NA	1.89617	NA	1.2	1.9	5092	0.00647036	NA	0.831821	NA	5.8	1.9	2626
Chr1	94027342	94312706	BCAR3	-	1.74082	79.0347	1.41969	80.4544	1.5	1.6	900574	2.02715	38.5881	0.822624	39.4108	5.8	4.3	1721132
Chr1	94335013	94344762	DNTTIP2	-	10.3182	81.2902	7.50092	88.7911	0.8	1.2	55309	33.5586	23.6484	0.535321	24.1837	6.3	2	80692
Chr1	94352589	94375012	GCLM	-	5.0477	84.8134	3.1923	88.0057	1.1	4.1	154510	58.892	30.1962	1.04045	31.2366	6.5	5.1	142813
Chr1	94458393	94586705	ABCA4	-	0.073853	-7.9679	91.1217	83.1538	0	0.1	390815	0.935788	-15.209	59.448	44.239	0.1	0.1	652621
Chr1	94634462	94703307	ARHGAP29	-	6.43257	71.0362	12.9509	83.9871	0.5	3.5	333810	9.29279	52.2346	3.24656	55.4811	5.9	5.1	121148
Chr1	94883932	94984219	ABCD3	+	27.3965	83.0922	1.72451	84.8167	1.2	4.3	246825	20.0144	56.6339	0.331292	56.9652	6.7	5.1	246749
Chr1	94994731	95007413	F3	-	0.962201	81.3847	6.68023	88.0649	1.5	1.2	21243	5.22042	43.6323	0.157672	43.79	5	3.7	53093
Chr1	95123088	95285837	LINC01057	-	1.66847	70.5443	12.7227	83.2671	2	0.8	199199	1.23416	42.6233	0.473101	43.0964	6.7	3.2	401488
Chr1	95285897	95360803	SLC44A3	+	0.837812	73.8064	12.7227	86.5291	0.7	2	124904	1.60329	57.9932	0.473101	58.4663	6.7	3.5	164100
Chr1	95362504	95392779	CNN3	-	45.0566	76.6833	3.24186	79.9252	2.1	2.4	149793	26.5072	50.4386	0.311558	50.7502	6.5	3.7	119207
Chr1	95393583	95428826	LOC729970	+	3.15849	69.3801	9.86866	79.2487	3.1	1.5	254834	0.819597	39.9066	0.546687	40.4533	6.6	2.1	121726
Chr1	95448278	95538507	ALG14	-	4.96209	83.882	4.04331	87.9253	0.9	1.4	254091	2.10495	55.604	2.30122	57.9052	2.5	1.4	274355
Chr1	95558072	95663161	TMEM56	+	12.6106	-11.8111	81.9311	70.12	0.9	0.2	369457	1.9902	-18.2793	65.9873	47.708	0.1	0.1	183921
Chr1	95583478	95710509	TMEM56-RWDD3	+	2.87478	71.0335	3.61151	74.645	1.9	3	381138	1.10484	52.239	0.940041	53.1791	4.1	2	270398
Chr1	95699710	95712781	RWDD3	+	2.85766	81.0269	12.9141	93.941	1.8	0.9	27522	3.27518	69.219	5.76299	74.982	2.6	0.9	45080
Chr1	95940292	95944912	FLJ31662	+	0.994594	-7.81652	86.62	78.8035	5	0.6	2388	0.564046	0	0	0	7.1	2.3	6056
Chr1	95975671	95981020	LOC100996635	+	0	-3.20707	69.2921	66.085	1	3.8	1990	0.00647036	-1.43111	1.43111	0	6.4	5.1	2861
Chr1	96719624	96839681	LOC101928241	-	0.184771	1.24833	81.57	82.8183	0	0.1	60588	0.185949	6.85397	20	26.854	5.5	0.5	125957
Chr1	97187174	97280605	PTBP2	+	1.8566	87.553	2.74892	90.3019	0.7	2.1	125882	2.72994	73.5875	1.55129	75.1388	3.2	2.5	129000
Chr1	97561478	97788511	DPYD-AS1	+	0.734879	2.65301	86.222	88.875	0.6	2.7	125646	0.00647036	-7.93618	59.0023	51.0661	5.1	0.1	537677
Chr1	98262476	98263607	DPYD-AS2	+	0.343095	-49.301	76.086	26.785	1.7	2.8	3371	0.00647036	NA	0	NA	6.2	4.8	1445
Chr1	97543299	98386615	DPYD	-	22.4585	85.9984	4.17789	90.1763	1	3.2	617870	1.28567	56.1668	0.404563	56.5714	5	4	1158798
Chr1	98510798	98510907	MIR2682	-	0	NA	12.8704	NA	1.4	0.6	0	0.00647036	NA	20.8983	NA	4.3	0.2	477
Chr1	98511625	98511727	MIR137	-	0	NA	6.21257	NA	0.5	1.4	9	0.00647036	NA	3.94528	NA	4.3	1	2196
Chr1	98453555	98515249	MIR137HG	-	0.0808376	45.9024	9.96871	55.8711	0.2	1.9	16318	0.20074	10.5828	17.9849	28.5677	0.1	0.1	55638
Chr1	98676266	98738214	LOC729987	+	0.318159	14.2741	61.87	76.1441	2.1	0.3	14942	0.493876	-0.342371	21.865	21.5226	0.1	0.1	53821
Chr1	99127235	99226056	SNX7	+	6.56513	88.4863	3.01393	91.5003	0.9	1.7	46410	17.1404	66.2051	2.94006	69.1452	4.3	2.6	109270
Chr1	99469831	99614408	LOC100129620	+	0.0455621	72.0153	5.31512	77.3304	0.9	2	50148	0.00647036	-30.5386	49.5731	19.0345	0.1	0.1	116979
Chr1	99355800	99470449	LPPR5	-	0.0385466	72.7506	6.61745	79.3681	1.3	1.6	30447	0.0704633	-42.5486	46.2216	3.67299	0.1	0.1	79344
Chr1	99729847	99775138	LPPR4	+	0.0519187	66.6342	15.1281	81.7623	0.6	1.2	26194	0.00647036	-23.692	32.2087	8.5167	0.1	0.1	35101
Chr1	100111430	100160097	PALMD	+	13.729	58.527	17.3251	75.8521	0.8	5.1	263264	0.244695	17.096	0.683846	17.7798	5.5	3.4	60903
Chr1	100154610	100178513	MIR548AA1	+	0	-7.02916	94.5031	87.474	0	0.1	33242	0.00647036	45.7049	12.429	58.1339	7.2	5.1	24509
Chr1	100174258	100231349	FRRS1	-	13.2186	52.6063	30.2493	82.8556	1.6	2.1	340583	6.75312	58.5043	0.325488	58.8298	5.3	3.4	344301
Chr1	100315639	100389579	AGL	+	21.0024	82.691	7.41892	90.11	0.6	3	135846	2.74081	66.3541	0.957622	67.3118	4.3	3.3	75444
Chr1	100435344	100492534	SLC35A3	+	7.57011	90.599	3.24437	93.8434	0.8	1.6	49750	3.77347	71.6586	0.49194	72.1505	3.6	2.3	105110
Chr1	100503788	100548929	HIAT1	+	2.93441	87.7977	1.07637	88.8741	1.2	2.1	134052	3.57165	67.0957	0.179857	67.2755	5.1	3.3	117362
Chr1	100549101	100598511	SASS6	-	0.379957	82.0295	11.4306	93.4601	1.1	1.1	40609	1.37919	69.5905	2.33672	71.9272	3	1.3	67818
Chr1	100598705	100616054	TRMT13	+	3.55506	79.7539	11.9587	91.7126	1.2	1	17261	4.31298	72.9887	2.33309	75.3218	3	1.6	28893
Chr1	100614003	100643829	LRRC39	-	0.419788	13.7083	76.4578	90.166	0.6	1.2	10044	0.428832	10.2593	34.5667	44.826	5.1	4.2	23782
Chr1	100652477	100715409	DBT	-	6.05608	87.0783	1.66525	88.7435	1.1	1.6	100397	1.27468	74.6731	0	74.6731	5	1.6	75668
Chr1	100731713	100758325	RTCA	+	11.8434	89.1548	2.08937	91.2442	0.8	1.3	39269	10.3208	75.6212	0.523443	76.1446	2.8	1.2	77768
Chr1	100730297	100731730	RTCA-AS1	-	1.49112	90.1526	2.08937	92.242	1.1	0.9	8719	1.08639	41.9866	0.523443	42.51	2.9	1.8	16585
Chr1	100746796	100746864	MIR553	+	0	NA	92.6662	NA	0	0.1	40	0.00647036	NA	89.0062	NA	0.1	0.1	68
Chr1	100818022	100985833	CDC14A	+	0.678095	85.9678	1.26407	87.2319	1.5	1.6	227120	0.885842	40.9125	0.614295	41.5268	3.1	1.5	170395
Chr1	101003727	101007583	GPR88	+	1.72307	-20.2888	30.5265	10.2377	0	2.5	34033	0.0604376	12.75	60.8776	73.6277	5.5	0.5	1593
Chr1	101092605	101112560	LINC01349	-	0	0.768441	80.019	80.7875	0	0.1	33305	0.00647036	-9.27757	48.736	39.4584	0.1	0.1	73549
Chr1	101185195	101204601	VCAM1	+	27.9491	16.882	50.4207	67.3027	0.4	4.5	51285	0.922217	9.9312	10.648	20.5792	0.1	0.1	29048
Chr1	101337927	101360735	EXTL2	-	2.48624	88.6764	1.21045	89.8868	2	1.5	54684	2.44246	62.0493	0.236276	62.2856	5.6	2.2	36925
Chr1	101361631	101447311	SLC30A7	+	3.80374	91.5566	1.28766	92.8442	2.3	1.2	96214	2.69224	69.9936	0.601391	70.595	5.6	2.6	99983
Chr1	101455179	101491362	DPH5	-	6.19415	89.8643	4.37701	94.2413	1	0.9	65474	9.60168	69.847	2.48253	72.3296	2.4	0.9	40082
Chr1	101491401	101552935	LOC102606465	+	0.559241	86.2127	5.88798	92.1007	0.9	1.1	71564	0.874126	65.0615	2.4515	67.513	2.4	1.5	65116
Chr1	101700428	101702084	LOC101928370	-	0.0399036	49.5458	2.53222	52.078	2.7	1.3	30138	0.115865	-6.15399	6.15399	0	4.5	1.7	12125
Chr1	101702304	101707076	S1PR1	+	3.09525	53.3968	1.60978	55.0065	1.4	2.6	78176	0.409746	32.8585	6.08366	38.9421	4.5	2.7	14598
Chr1	101806424	101806451	RNU6-31P	-	31268.5	NA	70.9841	NA	1.2	2.1	0	0.00647036	NA	4.286	NA	0.1	0.1	2
Chr1	102337566	102360299	DNAJA1P5	+	0.051088	2.78543	62.2933	65.0788	4	0.8	3884	0.0991936	-2.47733	5.714	3.23667	0.1	0.1	6497
Chr1	102268122	102462790	OLFM3	-	0	63.9468	6.91424	70.861	0.6	1.8	48172	0.00647036	-4.81013	9.46033	4.6502	0.1	0.1	112109
Chr1	103342022	103574052	COL11A1	-	0	58.2371	13.1052	71.3423	0.8	3	52934	0.00647036	3.66504	4.00984	7.67488	0.1	0.1	97912
Chr1	103960700	104068105	LOC101928436	-	0	71.9683	3.66827	75.6366	1.6	0.7	20654	0.00647036	15.8669	2.08353	17.9504	2.5	0.8	35779
Chr1	104068577	104097859	RNPC3	+	4.14257	89.0953	3.21483	92.3101	1.1	1.2	48080	2.37191	76.5337	1.40294	77.9367	2.5	1.3	40811
Chr1	104097265	104122156	AMY2B	+	2.64146	-6.03534	95.126	89.0907	0	0.1	28559	0.208125	-43.496	78.3085	34.8124	6.1	5.1	18240
Chr1	104112025	104114008	ACTG1P4	+	0.76303	-4.18611	96.1468	91.9607	0	0.1	597	0.497157	-4.23143	23.9914	19.76	0.1	0.1	4180
Chr1	104159998	104168400	AMY2A	+	0.276184	-17.5715	83.7173	66.1458	0	0.1	995	0.0682945	-1.70005	3.19353	1.49348	0.1	0.1	670
Chr1	104198140	104207173	AMY1A	+	0.0921907	-12.1783	79.1117	66.9334	0.3	0.5	0	0.0614662	2.71448	7.30019	10.0147	0.1	0.1	335
Chr1	104198302	104207172	AMY1C	+	0.0361557	-13.0003	79.8293	66.829	0.5	0.3	0	0.0569359	2.90937	7.45062	10.36	5.2	5.1	335
Chr1	104198324	104207172	AMY1B	+	0.144082	-13.0003	79.8293	66.829	0.5	0.3	0	0.0570831	2.90937	7.45062	10.36	5.2	5.1	335
Chr1	104230040	104238889	AMY1B	-	0.0991104	-11.9796	78.378	66.3984	0.5	0.3	0	0.0571379	0.751423	9.40558	10.157	0.1	0.1	0
Chr1	104230040	104238911	AMY1C	-	0.0361789	-11.9796	78.378	66.3984	0.5	0.3	0	0.0568826	0.751423	9.40558	10.157	0.1	0.1	0
Chr1	104230039	104239073	AMY1A	-	0.18683	-10.792	77.3232	66.5312	0.3	0.5	0	0.0669813	0.423778	9.40558	9.82935	0.1	0.1	0
Chr1	104292278	104301311	AMY1A	+	0.187222	-13.1465	79.5808	66.4343	0.3	0.5	0	0.0669813	2.51192	7.85291	10.3648	0.1	0.1	0
Chr1	104292440	104301310	AMY1C	+	0.0361705	-14.0646	80.3851	66.3206	0.5	0.3	0	0.0568826	2.695	8.04	10.735	5.2	5.1	0
Chr1	104292462	104301310	AMY1B	+	0.0990864	-14.0646	80.3851	66.3206	0.5	0.3	0	0.0571379	2.695	8.04	10.735	5.2	5.1	0
Chr1	104615644	104619693	LOC100129138	+	0.273991	-20.4447	84.66	64.2153	0	0.1	1592	0.204265	-34.7145	35.4285	0.714	0.1	0.1	3668
Chr1	107599266	107601916	PRMT6	+	1.30504	8.01173	18.6541	26.6659	0.4	1.7	33540	2.91208	-16.7793	19.1814	2.40206	3.1	2.8	49767
Chr1	107682628	108024475	NTNG1	+	0	62.644	3.74029	66.3843	0.9	3.1	109959	0.00647036	-40.28	48.7368	8.45687	0.1	0.1	242477
Chr1	108439844	108439926	MIR7852	+	0	NA	61.7419	NA	3.1	2.4	82	0.00647036	NA	2	NA	6.5	5.1	153
Chr1	108507064	108537229	VAV3-AS1	+	0	62.059	4.9667	67.0257	1.9	1.8	37475	0.00647036	-49.3616	62.0547	12.6931	0.1	0.1	22646
Chr1	108113781	108507545	VAV3	-	0.848258	71.4742	4.10838	75.5826	1.3	2.5	311232	0.00647036	-58.8583	62.3667	3.50845	0.1	0.1	279209
Chr1	108677343	108742980	SLC25A24	-	1.31065	72.5436	9.26179	81.8054	1.1	1.6	46747	0.00647036	-43.6531	62.8709	19.2177	0.1	0.1	49040
Chr1	108765962	108786703	NBPF4	-	0.0501446	-3.08171	74.2376	71.1559	0	0.1	796	0.0685177	5.17249	4.06609	9.23858	0.1	0.1	0
Chr1	108992903	109013260	NBPF6	+	0.0414386	-5.89208	77.8676	71.9755	0	0.1	0	0.0729834	9.10553	1.67824	10.7838	7	2	64
Chr1	109102970	109181949	FAM102B	+	1.71628	76.5926	9.23495	85.8276	1	2.3	121364	2.45914	50.2997	0.268344	50.568	3.5	2.3	103594
Chr1	109190909	109204148	HENMT1	-	0.38157	64.4349	26.5001	90.935	0.5	1	26614	0.00647036	-32.146	76.5432	44.3972	0.1	0.1	12612
Chr1	109234931	109244422	PRPF38B	+	8.49944	69.8473	1.42493	71.2722	1.1	2.8	81125	11.5947	54.0049	1.26755	55.2724	4.4	3.3	83537
Chr1	109255555	109285367	FNDC7	+	0	13.168	68.5869	81.7549	1.2	0.7	24371	0.0768279	11.7158	24.5419	36.2578	2.1	1.4	74187
Chr1	109289284	109352148	STXBP3	+	7.81007	90.4428	4.28228	94.7251	0.7	1.6	84623	6.14793	73.8362	1.30781	75.144	1.9	1.6	101476
Chr1	109399838	109401146	SPATA42	+	0.126965	5.59611	79.6656	85.2617	0	0.1	720	0.00647036	-15.0536	15.0536	0	6.2	2.7	818
Chr1	109358519	109400864	AKNAD1	-	0.0438565	5.30459	76.6252	81.9298	1.8	2	40279	0.00647036	17.0958	16.7311	33.8269	6.1	4.6	63887
Chr1	109419602	109473044	GPSM2	+	0.294768	75.1822	16.2714	91.4536	0.6	1.5	25445	8.02008	62.2717	7.47791	69.7496	3.7	3.1	74014
Chr1	109472129	109506121	CLCC1	-	5.28406	85.2145	7.82272	93.0372	0.9	1.2	74538	4.88003	74.2618	1.01191	75.2737	3.1	1.6	76608
Chr1	109512837	109584850	WDR47	-	1.08741	80.9222	12.7352	93.6575	0.6	1.9	36616	1.7382	66.636	3.77807	70.4141	3.1	2.2	118145
Chr1	109606997	109618624	TAF13	-	18.1066	63.677	29.1712	92.8482	0.5	1.2	29449	15.9488	59.9417	16.7717	76.7134	2.3	1.7	27653
Chr1	109633402	109639554	TMEM167B	+	4.26872	60.3316	25.8884	86.22	0.6	1.7	88648	1.98666	49.009	17.9273	66.9363	3.2	2.5	36575
Chr1	109642814	109643234	SCARNA2	+	93.5768	NA	21.6559	NA	0.5	1.4	39206	120.338	NA	15.7296	NA	2.1	1.5	39721
Chr1	109648572	109656479	C1orf194	-	0.0868408	51.7758	12.1612	63.937	1	2.3	6766	0.178335	-22.7634	47.325	24.5616	0.1	0.1	13493
Chr1	109656584	109749403	KIAA1324	+	2.37363	71.7103	13.2531	84.9635	2.3	1	161588	1.4845	-8.67494	51.6984	43.0234	0.1	0.1	353141
Chr1	109756514	109780804	SARS	+	25.6687	76.6941	13.9217	90.6159	0.5	1.8	86998	18.2705	65.2956	4.36872	69.6643	2.5	2	100343
Chr1	109792640	109818378	CELSR2	+	0.15708	66.8438	20.0445	86.8883	1.1	0.7	25370	0.309291	44.9503	12.0883	57.0386	1.8	0.7	181543
Chr1	109822175	109825790	PSRC1	-	0.337083	74.7998	8.95268	83.7525	1.1	1.3	9393	4.17088	69.9565	1.9984	71.9549	2.3	1.2	40007
Chr1	109834986	109849663	MYBPHL	-	0	4.40841	79.9969	84.4053	1.4	0.7	12537	0.00647036	23.1786	26.287	49.4655	0.1	0.1	26132
Chr1	109852187	109940563	SORT1	-	0.378286	78.257	8.79119	87.0482	0.8	1.6	87198	1.71791	48.0996	1.83506	49.9347	5.9	5.1	149380
Chr1	109941652	109969108	PSMA5	-	10.4787	84.5805	1.50669	86.0871	1.3	1.7	73201	13.5898	54.7841	0.243497	55.0276	4.8	3.2	115093
Chr1	110009099	110024764	SYPL2	+	0.260828	65.4845	13.2979	78.7824	0.8	1.4	16394	0.127062	2.83831	13.6619	16.5002	1.2	0.7	27996
Chr1	110026560	110035420	ATXN7L2	+	0.132808	67.8764	21.0162	88.8927	1.5	1.1	18793	0.507809	42.544	2.5265	45.0705	6.3	1.3	42311
Chr1	110036657	110043063	CYB561D1	+	1.29593	71.4755	20.0469	91.5224	0.7	0.9	15381	1.52205	55.509	6.24095	61.7499	2.5	1	44989
Chr1	110049445	110052336	AMIGO1	-	0.29216	84.5795	10.1526	94.7321	1.2	0.9	3946	0.116996	52.4268	9.68348	62.1103	2	0.7	6057
Chr1	110082493	110088455	GPR61	+	0.0441602	-1.09311	85.3235	84.2304	0	0.1	5776	0.00647036	32.7146	1.836	34.5506	2.8	1.4	10510
Chr1	110091185	110138454	GNAI3	+	9.95341	87.4757	1.33981	88.8155	2.5	1.6	83741	12.2907	66.1756	0.384267	66.5599	6.1	1.6	79895
Chr1	110141514	110141589	MIR197	+	0	NA	85.3019	NA	0.9	2.9	164	19.6358	16.1859	83.8141	100	0.1	0.1	0
Chr1	110145888	110155705	GNAT2	-	0.256387	15.8491	73.918	89.7671	0	0.1	6743	0.00647036	22.2055	42.6653	64.8708	0.1	0.1	12474
Chr1	110162434	110174677	AMPD2	+	4.11806	75.9054	3.55856	79.4639	1.3	2.2	85581	1.36334	57.8473	0.391226	58.2385	5.4	2.5	116577
Chr1	110198697	110208123	GSTM4	+	8.71117	60.5779	25.5434	86.1212	0.6	1.1	24854	2.18958	33.3418	19.5245	52.8663	1.5	1	42672
Chr1	110210643	110226619	GSTM2	+	13.4658	55.5142	34.0307	89.5449	0.9	1	11149	0.277166	-4.99245	39.226	34.2336	4	0.3	15981
Chr1	110230417	110236367	GSTM1	+	46.8745	41.0275	11.8696	52.8971	0.7	1.2	23755	0.206202	-63.85	77.7783	13.9283	0.1	0.1	0
Chr1	110254863	110260890	GSTM5	+	2.19666	28.8052	57.0179	85.8231	0.9	0.5	5863	0.199348	-13.7182	61.7368	48.0186	0.1	0.1	18633
Chr1	110276553	110283660	GSTM3	-	1.84059	49.5853	7.16709	56.7523	0.2	1.6	11899	10.3252	34.2381	0.868879	35.1069	3.7	2.2	51304
Chr1	110292701	110306644	EPS8L3	-	0	14.0512	76.6194	90.6706	0.7	1.4	12381	1.7973	56.2324	15.5076	71.74	2.5	1.6	110363
Chr1	110453232	110473616	CSF1	+	3.17707	74.2927	4.85426	79.147	0.7	3	143203	5.68555	28.9382	0.828112	29.7663	5.2	4.4	459251
Chr1	110527386	110566364	AHCYL1	+	16.3547	79.1443	3.68332	82.8276	1.3	1.4	166069	23.1105	49.992	0.736888	50.7289	4.2	2.8	169584
Chr1	110574198	110597263	STRIP1	+	1.43953	2.78375	61.6745	64.4582	2.2	0.2	53170	1.63037	25.4856	24.695	50.1806	4.2	0.4	74080
Chr1	110602996	110613322	ALX3	-	0.105523	21.269	18.3025	39.5715	0.5	3.3	5616	0.10955	11.783	57.9037	69.6867	0.1	0.1	15343
Chr1	110655061	110656569	UBL4B	+	0	-8.66206	79.3862	70.7242	0	0.1	1393	0.00647036	-2.71843	2.71843	0	4.8	3.9	3665
Chr1	110693131	110744823	SLC6A17	+	0.11775	64.6555	8.02055	72.676	0.4	1.6	20303	0.058591	-54.651	67.1028	12.4518	0.1	0.1	77186
Chr1	110751072	110752609	KCNC4-AS1	-	0.0630136	78.7257	9.86181	88.5875	2.5	0.6	9104	0.128852	13.9296	9.14702	23.0767	1.5	0.2	10755
Chr1	110753335	110776674	KCNC4	+	0.141022	67.3919	6.74507	74.137	1.2	1.9	29320	0.402003	40.892	18.2125	59.1045	1.6	0.7	58335
Chr1	110828998	110881793	LOC440600	-	0.261833	77.0953	1.01319	78.1085	1.4	2	211284	0.180476	35.7755	0.283815	36.0594	7.3	2.3	542991
Chr1	110881944	110889303	RBM15	+	2.84406	73.1747	1.0147	74.1894	2	1.3	65000	7.95453	0.764999	0.289799	1.0548	7.4	5.1	123188
Chr1	110905472	110933704	SLC16A4	-	2.54218	29.6356	62.5726	92.2081	1	1.7	46931	4.3705	60.41	3.36731	63.7773	4.9	1.3	70690
Chr1	110950430	110958896	LAMTOR5-AS1	+	0.655385	77.9832	7.71977	85.703	1.1	0.9	35969	0.00647036	46.8958	2.98958	49.8854	3.5	1.6	37956
Chr1	110943876	110950546	LAMTOR5	-	8.80351	83.2493	6.51335	89.7626	0.6	1.3	65590	12.0294	47.2971	3.06294	50.3601	3.4	2.1	74518
Chr1	110993787	110999976	PROK1	+	0.158766	12.1119	66.2529	78.3648	1.7	2.2	10336	0.00647036	17.1099	0	17.1099	4.2	2.7	10169
Chr1	111023387	111033891	CYMP	+	0	-8.64444	79.8006	71.1562	0	0.1	4315	0.00647036	8.63871	20.7233	29.362	4	3.6	15799
Chr1	111030301	111032880	LOC440602	-	0	-9.20665	84.0425	74.8359	0	0.1	995	0.00647036	1.63592	46.5523	48.1883	0.1	0.1	5272
Chr1	111059838	111061797	KCNA10	-	0	10.0229	77.9594	87.9822	1.1	0.2	796	0.170476	2.13486	34.1422	36.277	0.1	0.1	1603
Chr1	111136201	111174096	KCNA2	-	0.0494499	-3.28728	42.1248	38.8375	0.8	3.8	20067	0.00647036	-10.7574	21.7719	11.0144	0.1	0.1	52726
Chr1	111196185	111217655	KCNA3	-	0.716861	56.3958	9.16466	65.5605	1	1.2	23197	0.0997455	-35.5855	79.2619	43.6763	0.1	0.1	12830
Chr1	111413820	111442558	CD53	+	4.38704	3.43377	75.214	78.6478	0.4	5.1	59338	0.106038	-3.23935	39.6875	36.4481	0.1	0.1	56257
Chr1	111489811	111506566	LRIF1	-	4.37275	88.7288	7.44333	96.1722	0.9	1.1	57585	7.18398	78.6252	2.73968	81.3649	2.1	1.4	64525
Chr1	111682248	111727724	CEPT1	+	12.9978	73.1746	9.95236	83.1269	0.6	3.5	146605	6.09462	62.9288	3.89097	66.8197	4.8	3.9	114696
Chr1	111659953	111682838	DRAM2	-	2.61423	91.1774	1.51591	92.6934	2.8	1.3	66894	2.65101	71.9682	0.35232	72.3206	4.9	1.6	67757
Chr1	111728590	111747160	DENND2D	-	1.61689	64.7843	11.5165	76.3008	0.6	1.4	220523	0.914357	41.0855	9.98901	51.0745	4.8	4.2	97374
Chr1	111770280	111786062	CHI3L2	+	0	0.839916	79.2852	80.1251	1.2	0.8	7722	0.164141	-4.23319	26.4642	22.231	3.2	2.5	19071
Chr1	111823145	111828730	CHIAP2	+	0.140925	-3.97511	75.7114	71.7363	0.3	5.1	2581	0.190174	-2.55075	30.5886	28.0378	0.1	0.1	5850
Chr1	111833473	111863188	CHIA	+	0.122348	25.5265	51.8761	77.4025	5	1.2	8159	0.00647036	-1.4268	15.7479	14.3211	0.1	0.1	24698
Chr1	111889194	111895639	PIFO	+	0	58.974	22.3712	81.3452	1	0.7	3637	0.120312	15.4853	21.4182	36.9035	3.6	0.4	6361
Chr1	111927140	111932473	PGCP1	-	0	31.7133	53.2794	84.9927	1.6	1.2	2348	0.00647036	11.5817	0	11.5817	3.9	1.7	7020
Chr1	111956936	111970399	OVGP1	-	1.51818	-7.10807	85.4444	78.3364	0	0.1	34029	0.586558	21.0974	9.42714	30.5246	3.7	1.5	38989
Chr1	111991742	112004525	ATP5F1	+	25.8684	84.3185	2.86833	87.1868	1.6	1.6	32077	17.5818	71.7588	0.336761	72.0956	4.2	1.5	43786
Chr1	111982511	111991830	WDR77	-	4.31504	83.0161	2.80927	85.8253	1.4	1.7	25825	6.11391	56.0504	0.428345	56.4788	4.2	2.9	45092
Chr1	112016603	112021134	C1orf162	+	1.81387	1.67595	83.2479	84.9239	0.2	1.4	20340	0.00647036	-28.8093	70.824	42.0147	0.1	0.1	2785
Chr1	112025969	112106597	ADORA3	-	2.49588	-14.8728	89.1076	74.2348	0	0.1	226159	0.00647036	-13.4315	46.1776	32.7461	0.1	0.1	207730
Chr1	112141628	112150940	LINC01160	-	0.602591	-1.52669	88.6463	87.1197	0.3	0.6	8159	0.662427	-40.8286	77.5397	36.7111	0.1	0.1	25700
Chr1	112162404	112259317	RAP1A	+	9.4984	74.818	12.3333	87.1513	0.6	1.8	176551	4.81388	60.7644	7.0974	67.8618	2.8	2.1	160241
Chr1	112282462	112290420	FAM212B-AS1	+	0.1032	78.1768	5.71832	83.8951	1.9	1.4	10775	0.160688	45.7761	0.971095	46.7472	4.5	1.1	24766
Chr1	112298189	112310199	DDX20	+	2.06571	84.9199	4.41492	89.3348	0.8	1.6	43542	5.40819	64.5274	1.97041	66.4978	2.6	1.8	42000
Chr1	112264685	112298419	FAM212B	-	0.250176	49.133	2.54528	51.6783	1.2	1.1	126255	0.538947	23.2162	0.652995	23.8692	2.6	1.1	132814
Chr1	112396383	112399527	KCND3-IT1	-	0	13.4552	73.4697	86.9248	2.2	0.8	4127	0.00647036	0.492407	1.23173	1.72414	3.9	3.4	4486
Chr1	112318453	112531777	KCND3	-	2.00016	80.6756	4.82933	85.5049	2.8	1	381613	0.00647036	-4.90781	14.327	9.41916	0.1	0.1	283354
Chr1	112533189	112541463	LOC643355	+	0.113159	75.6511	2.63904	78.2901	2.3	1.4	45630	0.157567	6.62082	4.15873	10.7796	2.1	1.2	9338
Chr1	112938799	113003786	CTTNBP2NL	+	0.911198	83.891	7.17886	91.0699	0.8	1.5	81798	2.1428	70.5671	0.488641	71.0558	5.5	2.4	122281
Chr1	113004391	113004455	MIR4256	-	0	NA	55.2979	NA	1.2	0.8	359	0.00647036	NA	0.698864	NA	3.3	2.2	86
Chr1	113009162	113063910	WNT2B	+	0.303199	36.9967	19.561	56.5577	2.1	0.5	24530	0.313281	36.412	8.51631	44.9283	1.7	1.1	79078
Chr1	113066140	113162040	ST7L	-	2.0955	92.0204	0.926276	92.9467	1.6	1.7	114824	1.20151	74.0234	0.146354	74.1698	4	1.9	170034
Chr1	113162074	113214241	CAPZA1	+	17.4533	88.5122	1.0666	89.5788	1.7	1.6	155619	33.309	59.5362	0.145549	59.6817	3.9	2.1	186488
Chr1	113216933	113243368	MOV10	+	5.80147	77.0508	3.86459	80.9154	1	2	162905	2.54753	61.581	0.721022	62.302	3.5	2	183369
Chr1	113243748	113250025	RHOC	-	16.3011	57.0237	9.02042	66.0441	0.6	3	123664	72.434	10.204	1.30774	11.5118	4.7	3.4	222967
Chr1	113252615	113257950	PPM1J	-	0.0517369	66.9617	1.84766	68.8094	1.4	1.9	11542	0.00647036	32.02	0.409952	32.43	3.4	1.7	11956
Chr1	113263188	113269856	FAM19A3	+	0.0655907	-22.6724	87.1162	64.4437	0	0.1	4653	0.00647036	21.7336	2.72727	24.4609	3.1	2.5	9496
Chr1	113362790	113393265	LINC01356	-	0.641061	54.136	29.2317	83.3677	0	1.7	9566	0.568132	-2.88619	39.195	36.3088	0.1	0.1	34996
Chr1	113465971	113467295	AKR7A2P1	+	0.756959	6.75064	90.6194	97.37	0.2	1	2483	0.304897	-15.1091	89.2741	74.165	0.1	0.1	3651
Chr1	113454469	113498975	SLC16A1	-	18.5912	88.3067	3.40518	91.7119	1.5	2.1	118152	9.61964	74.4471	1.30082	75.7479	4.9	2.2	119748
Chr1	113499036	113506690	SLC16A1-AS1	+	0.773752	86.3156	3.61842	89.934	2.1	1.6	40047	0.930921	51.3503	1.34234	52.6926	4.8	2.7	50563
Chr1	113554308	113615724	LOC100996251	-	1.17687	83.9103	1.93224	85.8425	1.4	1.2	138513	0.535381	54.9042	0	54.9042	2.7	1.3	127402
Chr1	113615830	113667342	LRIG2	+	1.74277	91.8374	1.45146	93.2889	1.2	1.4	78089	1.34925	79.5294	0	79.5294	2.7	1.4	102015
Chr1	113739403	113748875	LOC643441	-	0	21.7201	62.3658	84.086	1	1.4	4670	0.0895393	24.9911	25.3575	50.3486	1.8	1.4	9054
Chr1	113933474	114228545	MAGI3	+	4.43006	86.0715	1.13374	87.2053	2.4	3.8	337935	5.60323	60.4402	1.23265	61.6729	7.4	5.1	366000
Chr1	114239823	114301777	PHTF1	-	1.4699	91.9385	1.14047	93.079	1.2	1.9	59256	2.34321	72.5424	0.998856	73.5412	3.5	2.2	81693
Chr1	114304453	114355070	RSBN1	-	1.57594	74.8103	12.7367	87.547	0.7	2.9	164725	1.37935	51.4823	11.9479	63.4302	4.1	3.4	100204
Chr1	114399256	114443859	AP4B1-AS1	+	0.385721	-4.63901	94.1125	89.4735	0	0.1	61686	0.523409	10.9696	42.3614	53.331	4	0.6	131526
Chr1	114356432	114414375	PTPN22	-	0.219674	11.0028	78.0037	89.0065	2.6	1.5	32569	0.00647036	11.6658	37.6971	49.363	0.1	0.1	61653
Chr1	114419435	114430169	BCL2L15	-	0.278774	9.12537	83.8754	93.0008	1.3	1.4	10149	3.28905	67.0926	0.512821	67.6054	3.7	1.8	58289
Chr1	114437370	114447741	AP4B1	-	1.58864	86.8068	6.29131	93.0982	1	1.5	66075	1.63116	80.7614	0.445034	81.2064	2.8	1.5	49741
Chr1	114447914	114456708	DCLRE1B	+	0.325869	84.1246	10.4556	94.5802	1.5	1	23980	0.998112	70.5047	0.712745	71.2175	2.8	1.2	41877
Chr1	114471995	114520491	HIPK1	+	4.82525	80.2195	2.43982	82.6593	1.4	2.9	136603	3.29256	67.318	0.505644	67.8237	5.2	3.4	97906
Chr1	114466622	114472147	HIPK1-AS1	-	0.516382	85.986	2.29322	88.2793	2.7	1.6	96174	0.327445	29.6208	0.492114	30.1129	5.3	2.1	37369
Chr1	114522012	114524876	OLFML3	+	4.05043	27.5675	58.43	85.9975	1.6	0.7	14520	0.139258	51.3861	20.0439	71.43	3.8	0.9	4450
Chr1	114631913	114696472	SYT6	-	0	65.7017	5.34181	71.0435	1.9	1.9	41392	0.00647036	-37.7287	47.8572	10.1285	0.1	0.1	86972
Chr1	114935398	115053781	TRIM33	-	4.66686	90.4773	1.65893	92.1362	1.2	1.8	168691	2.96391	71.7782	1.32589	73.1041	4.6	3.3	188403
Chr1	115110180	115124265	BCAS2	-	19.9243	73.4675	21.3308	94.7983	0.7	1.1	39252	18.7155	65.2649	13.6532	78.9181	2.3	1.5	22369
Chr1	115127195	115212732	DENND2C	-	0.756385	87.6098	3.37629	90.9861	1.2	1.6	84382	0.26462	34.7818	4.08082	38.8626	1.5	0.6	87563
Chr1	115215719	115238239	AMPD1	-	0	-2.92606	85.6407	82.7147	1.8	0.1	8756	0.0853232	-2.79223	24.2793	21.4871	1.8	1.5	22856
Chr1	115247084	115259515	NRAS	-	5.73817	80.3843	11.8351	92.2193	0.5	1.2	25673	9.04757	68.6559	2.32892	70.9848	2	1.2	33411
Chr1	115259533	115300671	CSDE1	-	49.5628	72.8724	6.35209	79.2245	0.6	3.1	209481	28.0114	58.5977	0.186944	58.7846	4.7	3.9	114011
Chr1	115312104	115323308	SIKE1	-	4.02274	79.5898	15.6037	95.1935	0.7	1.3	37554	2.0926	61.6976	15.9807	77.6783	1.4	1	38640
Chr1	115397423	115537990	SYCP1	+	0.0423928	37.9642	36.1416	74.1058	0.3	1.3	33030	0.00647036	-33.1607	42.0729	8.91221	0.1	0.1	86752
Chr1	115572444	115576930	TSHB	+	0	18.1692	69.696	87.8652	2.2	1.7	1440	0.365662	NA	NA	17.1	3.8	0.9	2623
Chr1	115590632	115632121	TSPAN2	-	0.116316	70.1034	7.10582	77.2092	1.1	0.9	24875	0.00647036	-35.2972	46.291	10.9938	0.1	0.1	51956
Chr1	115828536	115880857	NGF	-	0.363391	66.3298	8.26321	74.593	1.3	1.5	113297	0.134801	13.6215	13.8141	27.4356	4.9	0.3	73490
Chr1	116184573	116240845	VANGL1	+	0.616837	84.2255	6.40774	90.6332	0.6	1.7	60496	1.09978	66.7617	1.89255	68.6542	2.9	2	231148
Chr1	116242625	116311426	CASQ2	-	0.0881586	3.81986	75.5593	79.3792	1.2	0.6	45100	0.0729458	1.77962	9.33043	11.1101	1.8	0.4	75857
Chr1	116378998	116383747	NHLH2	-	0.0379396	-29.4248	35.1974	5.77264	0.5	3.7	2189	0.00647036	67.5873	2.55857	70.1459	6	1	3143
Chr1	116519118	116612675	SLC22A15	+	0.0827075	68.2058	16.2928	84.4986	0.8	2	43780	0.415374	47.916	6.90765	54.8237	3.5	2.8	99563
Chr1	116654375	116677861	MAB21L3	+	10.1765	39.1097	40.1919	79.3015	2.2	2.5	71212	9.31571	43.6407	2.59184	46.2326	5.5	1.7	126585
Chr1	116915794	116947396	ATP1A1	+	36.17	69.1141	7.11881	76.2329	0.8	1.7	240527	38.206	31.3509	6.41892	37.7698	5.9	5.1	165709
Chr1	116935486	116961244	ATP1A1-AS1	-	14.1025	67.7773	21.624	89.4014	0.6	1	64012	7.66081	46.0636	3.39187	49.4554	2.1	1	69092
Chr1	117057155	117113715	CD58	-	1.11113	85.279	4.09677	89.3757	0.8	1.3	100937	8.3191	64.3589	0.79978	65.1586	4.1	2.9	192682
Chr1	117117019	117210377	IGSF3	-	0.142912	63.2293	16.523	79.7524	0.6	1.8	54259	4.02084	30.834	8.94701	39.781	2.1	1.7	164378
Chr1	117214370	117214449	MIR320B1	+	0	NA	66.6816	NA	0	0.1	0	0.00647036	NA	14.6084	NA	4.1	3.4	0
Chr1	117236733	117249225	C1orf137	+	0	2.232	84.7074	86.9394	0	0.1	3399	0.00647036	13.9458	25.0797	39.0255	1.3	0.9	13522
Chr1	117297085	117311851	CD2	+	0.714977	3.3836	78.458	81.8416	0	0.1	27683	0.00647036	4.65732	17.2677	21.925	0.1	0.1	20736
Chr1	117452688	117532972	PTGFRN	+	1.32039	79.559	10.1515	89.7105	0.7	1.3	76873	3.48031	58.9649	3.07801	62.0429	3.4	2.6	126098
Chr1	117544371	117579173	CD101	+	0.154	5.57457	81.0108	86.5854	1.5	2.2	25174	0.0744485	7.63243	24.64	32.2724	5.7	5.1	40948
Chr1	117568103	117602112	LOC101929099	-	0.0913192	84.5794	3.66472	88.2441	1.7	0.7	17633	0.0980938	40.1281	0.367563	40.4957	3.2	1.5	51574
Chr1	117602948	117645491	TTF2	+	0.468811	83.4175	9.58201	92.9996	1.5	0.9	19251	2.97399	68.8869	4.33629	73.2232	3.3	1	67395
Chr1	117637264	117637350	MIR942	+	0	NA	95.61	NA	0	0.1	0	0.00647036	NA	63.813	NA	3	0.1	86
Chr1	117653676	117664411	TRIM45	-	0.263607	79.8756	8.42382	88.2994	1	1	12827	0.759854	54.9559	0.633229	55.5891	2.7	1.4	25984
Chr1	117686208	117753582	VTCN1	-	0.271611	12.1698	68.7739	80.9438	1	3.7	42788	0.537319	21.3881	14.0384	35.4265	4.5	3.1	144948
Chr1	117910084	118068320	MAN1A2	+	13.1975	86.6885	2.46872	89.1573	1.6	3	142123	6.99399	66.7323	0.301429	67.0338	6.4	4.7	128091
Chr1	118148603	118171011	FAM46C	+	1.35391	77.6894	1.26188	78.9513	1	2.2	70081	0.177038	32.03	1.11878	33.1488	2.6	1.4	32502
Chr1	118406106	118472302	GDAP2	-	4.75871	89.4058	1.27713	90.6829	1.7	1.3	62634	4.30554	67.4945	0.453424	67.9479	5	1.8	89803
Chr1	118472371	118503049	WDR3	+	7.804	92.6138	1.27713	93.8909	1.3	1.7	59026	13.0807	76.0281	0.453424	76.4815	4.9	3.2	57159
Chr1	118496287	118727848	SPAG17	-	0.0688501	45.4305	33.6533	79.0838	0.9	0.6	118139	0.0674312	-3.32273	20.1832	16.8605	0.1	0.1	177735
Chr1	119425665	119532179	TBX15	-	8.36256	32.3812	18.4851	50.8663	0.6	0.6	334320	1.29859	-7.94298	69.7187	61.7757	0.1	0.1	361049
Chr1	119573838	119683295	WARS2	-	1.0347	77.9807	13.7931	91.7737	0.7	1.4	112158	0.618948	59.7178	7.72814	67.4459	3.6	2.9	140398
Chr1	119911401	119936751	HAO2	+	52.0735	29.9012	37.7776	67.6788	1.3	1.6	231387	0.109642	10.3207	3.72652	14.0472	5.2	4.4	30594
Chr1	119911568	119912953	HAO2-IT1	+	2.12492	18.0389	43.8361	61.875	1.5	1.4	17712	0.00647036	-4.51105	4.51105	0	5.3	4.3	1662
Chr1	119957553	119965662	HSD3B2	+	0.0518064	0.4128	87.86	88.2728	5	1.5	10746	0.00647036	-4.13021	5.84455	1.71433	3.9	0.3	9991
Chr1	120049825	120057681	HSD3B1	+	0.05208	13.3379	77.1581	90.496	0	0.1	2786	0.00647036	0.0338992	2.62231	2.65621	0.1	0.1	10552
Chr1	120106502	120115199	HSD3BP4	+	0.255223	5.4986	81.9667	87.4653	1.8	1.9	5668	0.205589	4.92648	11.905	16.8315	0.1	0.1	15461
Chr1	120140324	120141914	LINC00622	-	0.325441	6.96625	88.0837	95.05	0.3	1.5	398	0.00647036	-10.1894	18.5244	8.335	0.1	0.1	0
Chr1	120161999	120190390	ZNF697	-	1.70059	72.7722	6.27559	79.0478	1.4	0.9	101709	0.736503	61.864	3.91759	65.7816	2.2	0.8	37534
Chr1	120254418	120286849	PHGDH	+	17.378	66.1206	10.3768	76.4974	0.3	2.9	125916	4.66062	24.091	5.00361	29.0946	2.1	1.8	68544
Chr1	120290618	120311555	HMGCS2	-	183.346	37.6872	31.2189	68.9062	0.4	5	155151	0.798204	28.0394	2.55647	30.5959	0.1	0.1	71803
Chr1	120336640	120354203	REG4	-	0.0910704	-3.17884	80.3904	77.2116	0	0.1	39028	0.411793	21.6413	13.8064	35.4477	5.3	4.2	40625
Chr1	120377387	120387503	NBPF7	-	1.11724	17.5306	68.9743	86.505	4.3	1.1	3781	1.71273	9.14191	16.0073	25.1492	4.7	0.1	14569
Chr1	120436155	120439147	ADAM30	-	0	-32.6539	81.1895	48.5356	0.2	0.4	8020	0.00647036	-55.4111	62.4378	7.02674	0.1	0.1	8120
Chr1	120454175	120612317	NOTCH2	-	6.82032	77.5586	3.32508	80.8837	0.7	3.2	447820	1.77071	61.5253	0.878206	62.4035	4.2	3	131308
Chr1	120839004	120855681	FAM72B	+	0.041162	86.764	1.3182	88.0822	3.5	1.4	790	4.54934	73.5085	0.117784	73.6263	6.6	1.7	1194
Chr1	120906033	120914842	HIST2H2BA	+	0.953249	67.5347	20.4642	87.9989	1.8	1.2	1173	3.40042	-2.54312	39.4291	36.886	0.1	0.1	1340
Chr1	120926127	120935944	FCGR1B	-	0.160408	3.93555	68.642	72.5776	0	0.1	4975	0.190788	12.3892	1.47	13.8592	7.6	2.6	335
Chr1	121107151	121131061	SRGAP2D	+	2.90721	0.220898	82.22	82.4409	0.3	1	17512	23.2924	17.9289	46.6391	64.568	1.5	1.1	9436
Chr1	121102016	121139765	SRGAP2-AS1	-	0.269044	17.2588	40.4279	57.6867	0.4	0.4	34912	0.354483	11.4003	31.5824	42.9827	1.1	0.3	23010
Chr1	121260909	121313686	EMBP1	+	1.05431	73.5128	7.46624	80.9791	1.6	1.2	90662	0.273702	35.5068	0.615793	36.1226	6.6	5.1	55758
Chr1	142697420	142713605	ANKRD20A12P	-	1.79486	-0.78961	49.6659	48.8763	0	0.1	1592	1.95118	-3.17272	12.3423	9.16958	0.1	0.1	2345
Chr1	143134602	143202239	LOC102723769	-	0.611972	-10.0727	61.0048	50.932	0	0.1	23370	0.453722	2.42235	4.51053	6.93288	3.9	3.6	27281
Chr1	143672920	143673002	MIR6077	+	0	NA	35.528	NA	0.5	2	0	0.00647036	NA	13.8853	NA	1.6	1.1	0
Chr1	143687126	143717173	LOC100132057	+	0.330947	65.4803	20.63	86.1103	1.3	1.1	796	0.834335	52.376	0.940435	53.3165	3.9	2.4	0
Chr1	143717587	143744519	LINC01138	-	0.88306	64.2669	3.4369	67.7038	1.1	2.6	40067	1.84664	49.4694	0.588685	50.0581	4.1	3	56820
Chr1	143767143	143767881	PPIAL4G	-	0.594192	NA	84.0797	NA	0	0.1	343	1.17282	NA	34.4049	NA	0.1	0.1	0
Chr1	143896451	143913143	FAM72D	-	0.0359396	85.7096	1.65185	87.3614	3.5	1.4	398	3.28382	72.7626	0.212154	72.9747	7	2.3	335
Chr1	143896524	143913160	FAM72C	-	0.0582086	85.7096	1.65185	87.3614	3.5	1.4	398	2.98758	72.7626	0.212154	72.9747	7	2.3	335
Chr1	144146810	146467744	NBPF20	+	6.60801	1.33842	67.9368	69.2752	0	0.1	3816024	5.68747	-5.54691	48.0314	42.4845	0.1	0.1	7921092
Chr1	144300467	144341077	LINC00869	-	1.26387	52.0273	5.3826	57.4099	0.8	2.5	1791	3.11301	36.9137	1.30285	38.2165	4.1	3.1	1675
Chr1	144298163	144341756	LINC00623	-	0.275349	33.3989	19.9339	53.3328	0.2	3.1	1791	0.299005	25.9891	9.66836	35.6575	4	3.7	1675
Chr1	144363461	144364246	PPIAL4C	-	0.153359	NA	79.2995	NA	0	0.1	0	0.62014	NA	38.0161	NA	0.1	0.1	0
Chr1	144610814	144612719	PFN1P2	-	11.9261	-0.697107	89.4259	88.7288	0	0.1	796	12.8425	-12.0733	83.9613	71.888	0.1	0.1	182
Chr1	144614958	144830407	NBPF8	+	1.67067	11.9733	71.0812	83.0545	0.3	2.9	41105	1.35161	-7.8592	64.7453	56.8861	2.9	2.6	13599
Chr1	144614958	145370304	NBPF9	+	4.76232	1.29852	71.0812	72.3797	0.3	2.9	1652269	5.70199	-22.7846	64.7453	41.9606	2.9	2.6	2984513
Chr1	144676436	144680025	LOC653513	-	3.62206	16.7973	75.5176	92.3149	1.2	0.9	1488	0.459608	28.4147	34.8558	63.2705	0.7	0.2	1374
Chr1	144851423	145076186	PDE4DIP	-	23.2745	52.5393	20.9777	73.5169	0.3	1.2	832944	11.2605	-12.472	47.9296	35.4576	0.1	0.1	2173027
Chr1	145096406	145116997	SEC22B	+	19.5067	45.5675	37.103	82.6705	0.3	1.4	158845	9.70356	0.118352	26.152	26.2704	1.3	1	157480
Chr1	145209112	145286270	NOTCH2NL	+	9.6739	71.3273	3.78601	75.1133	0.7	3.2	263883	8.85539	53.9023	1.1237	55.026	4.2	3.1	139860
Chr1	145289769	146467743	NBPF25P	+	2.91711	-3.13782	73.0694	69.9316	0	0.1	1943048	3.91938	24.8675	19.9481	44.8157	2.8	1.5	4650621
Chr1	145293370	146466121	NBPF10	+	7.73041	24.9813	44.9861	69.9674	0.9	1.5	1903958	6.76804	18.5309	26.2923	44.8232	2.2	1.1	4612108
Chr1	145413190	145417545	HFE2	+	51.0704	12.0972	26.4013	38.4985	1.3	2.8	134652	0.160604	34.078	8.29846	42.3764	2.8	2.2	22954
Chr1	145438437	145442628	TXNIP	+	58.892	37.4318	4.13519	41.567	1.5	2.1	88445	0.718623	26.661	2.242	28.903	3.4	1.6	16431
Chr1	145456235	145470387	POLR3GL	-	16.3729	73.0958	8.83692	81.9327	0.7	1	81638	8.83249	45.5235	2.46222	47.9857	2.3	1	76780
Chr1	145470507	145475647	ANKRD34A	+	0.0801136	0.308669	9.08182	9.39049	1	0.7	68988	0.236399	19.4545	2.4087	21.8632	2.3	1.3	87228
Chr1	145477066	145501669	LIX1L	+	2.38749	87.3854	3.26047	90.6459	0.8	2.3	74812	5.37394	68.7465	0.579492	69.326	5.2	1.9	149518
Chr1	145507556	145513535	RBM8A	+	6.49934	70.6126	19.3208	89.9333	0.8	1.1	51364	14.788	49.4143	7.46026	56.8746	2.6	1.3	87787
Chr1	145509751	145516076	GNRHR2	-	14.2156	82.7162	1.38561	84.1018	1.3	1.3	29091	11.27	37.2712	1.56517	38.8364	2.6	1.5	57472
Chr1	145516164	145523732	PEX11B	+	2.32237	90.3175	0.757868	91.0754	1.3	1.3	27677	3.03659	63.3648	1.55525	64.9201	2.5	1.1	94115
Chr1	145524989	145543868	ITGA10	+	0.0916736	-4.11176	91.56	87.4482	2.9	0.7	60507	0.126146	24.653	21.0403	45.6933	5.5	3.8	249497
Chr1	145549208	145568526	ANKRD35	+	0.437074	51.9086	20.6686	72.5771	0.9	0.9	18054	0.0763896	24.019	10.3193	34.3384	3.4	2.8	75431
Chr1	145575987	145586546	PIAS3	+	0.702854	90.6136	1.81006	92.4236	1.4	1.2	12803	2.12587	60.3452	1.22455	61.5698	2.4	1.1	86641
Chr1	145584422	145584481	MIR6736	+	0	NA	89.6389	NA	0	0.1	0	0.00647036	NA	37.9538	NA	1.5	1.1	328
Chr1	145586492	145589435	NUDT17	-	0.163563	72.3086	20.1475	92.456	0.9	0.9	6442	1.39964	36.8977	4.63276	41.5305	2.4	1	73352
Chr1	145592604	145610884	POLR3C	-	3.78922	80.7402	12.6398	93.38	1.6	0.9	37351	10.7477	74.2187	3.0766	77.2953	4.6	1.2	153369
Chr1	145610989	145689005	RNF115	+	5.68047	85.1035	5.69511	90.7987	0.9	1.6	82448	26.461	55.7146	3.75404	59.4686	4.6	3.4	558199
Chr1	145695797	145715639	CD160	-	0.647401	-22.1097	93.6133	71.5036	0	0.1	22314	0.486139	4.41907	41.875	46.2941	0.1	0.1	165605
Chr1	145727665	145764206	PDZK1	+	20.1787	46.5565	40.6956	87.2521	1.2	1.6	100107	7.97687	55.702	3.00267	58.7047	3	1.9	211605
Chr1	145764594	145827103	GPR89A	-	3.38818	71.925	19.9578	91.8828	0.5	1.7	23434	6.3887	57.1132	12.938	70.0512	2	1.7	29616
Chr1	145924387	145945477	PDZK1P2	-	9.39739	66.4294	12.674	79.1034	0.8	2	199	2.81465	25.4048	37.5538	62.9585	1.1	0.7	670
Chr1	146032541	146082633	NBPF11	-	4.05685	73.6099	4.15547	77.7654	0.7	2.6	199	4.13959	70.6353	3.29585	73.9311	2.7	2.2	335
Chr1	146373856	146467639	NBPF12	+	3.2908	75.4515	1.87286	77.3244	0.8	2.7	73872	2.48549	64.5488	1.62527	66.174	3.1	2.4	20196
Chr1	146490894	146514599	LOC728989	-	1.35024	-12.2194	94.6209	82.4015	0	0.1	2786	0.158078	-6.77242	12.945	6.17258	0.1	0.1	55159
Chr1	146571065	146585928	NBPF13P	-	14.6754	11.2043	64.3971	75.6014	1.4	5	65869	0.267193	-2.23505	9.306	7.07095	0.1	0.1	59139
Chr1	146626684	146644168	PRKAB2	-	10.4967	67.2566	4.68706	71.9436	1	4.1	124581	8.47938	48.1544	0.549656	48.704	5.4	3.9	290834
Chr1	146649429	146651528	PDIA3P1	+	6.42429	47.4996	49.9987	97.4983	0.3	0.9	2786	2.67882	-13.5769	81.0242	67.4472	0.1	0.1	4938
Chr1	146655883	146697230	FMO5	-	87.2098	59.5002	18.2639	77.7641	0.5	3.5	178885	8.36868	48.5089	1.6247	50.1336	3.2	1.8	300712
Chr1	146714290	146767447	CHD1L	+	16.4364	85.3402	2.36552	87.7058	0.7	2	121812	99.0543	68.1736	0.626261	68.7999	3.1	2.5	368314
Chr1	146853913	146989699	LINC00624	-	0.0647156	-14.5133	92.7712	78.2579	0	0.1	214323	0.812853	-47.7859	60.1693	12.3834	0.1	0.1	405295
Chr1	147013270	147098020	BCL9	+	0.525403	50.8128	26.3207	77.1336	1.7	1.5	96053	1.32936	38.4291	0.826667	39.2558	5.8	3	568516
Chr1	147119167	147142634	ACP6	-	0.901289	80.1169	12.4273	92.5442	0.6	1.6	66090	2.22438	50.6445	10.4655	61.1101	2.4	1.7	193820
Chr1	147228331	147245466	GJA5	-	0.139199	21.6627	62.5742	84.2369	1.1	5.1	10830	0.645599	-1.06684	12.6187	11.5519	0.1	0.1	242798
Chr1	147374945	147381395	GJA8	+	0.071756	5.49149	84.6824	90.1739	0	0.1	2189	0.00647036	15.4633	18.7735	34.2369	0.1	0.1	20669
Chr1	147400505	147465753	GPR89B	+	3.0118	73.5066	17.4746	90.9812	0.4	1.7	15824	5.89385	63.6338	13.2909	76.9247	2	1.7	10875
Chr1	147466093	147487188	PDZK1P2	-	9.39739	66.5242	12.2042	78.7283	0.8	2	199	2.81465	25.3215	37.6298	62.9513	1.2	0.7	335
Chr1	147574322	147624469	NBPF11	-	2.94107	75.193	4.33123	79.5242	0.7	2.6	836	3.19214	71.2458	3.06813	74.3139	2.8	2.3	335
Chr1	147680369	147719342	LOC101927468	-	0.108355	51.6137	27.2903	78.9041	0.2	1.9	18118	0.0873734	-15.5975	29.8447	14.2473	0.8	0.3	95979
Chr1	147806602	147806678	MIR5087	-	0	NA	5.5794	NA	1.6	0.9	2484	0.00647036	NA	0.596496	NA	2.4	1.2	422
Chr1	147860433	147860515	MIR6077	+	0	NA	36.1256	NA	0.2	1.9	0	0.00647036	NA	13.8959	NA	1.6	1.1	0
Chr1	147874635	147904682	LOC100132057	+	0.320806	68.2017	19.6425	87.8442	1.2	1.1	0	0.862382	51.6035	0.954522	52.558	4	2.5	0
Chr1	147954634	147955419	PPIAL4B	-	0.147758	NA	77.8204	NA	0.4	5.1	0	0.645188	NA	33.2822	NA	0.1	0.1	0
Chr1	147994145	147994313	RNVU1-19	+	125.44	NA	12.0199	NA	0.8	1.9	1518	161.242	NA	14.3875	NA	2.5	1.8	0
Chr1	148201751	148202536	PPIAL4D	-	0.167811	NA	78.3505	NA	0	0.1	0	0.57407	NA	14.8531	NA	0.1	0.1	0
Chr1	148250248	148346756	NBPF14	-	7.42381	9.92124	69.7502	79.6714	0.7	2	2753	6.82291	0.0167761	62.2184	62.2351	2.1	1.6	2680
Chr1	147574322	148346929	NBPF8	-	7.11439	-9.21517	72.6655	63.4503	0.5	2.2	188995	6.00781	-23.4438	62.994	39.5502	2.2	1.8	587053
Chr1	148250248	148346929	NBPF9	-	1.30406	6.81864	72.6655	79.4842	0.5	2.2	3129	1.69656	-0.793875	62.994	62.2001	2.2	1.8	2680
Chr1	148558187	148596267	NBPF15	+	7.06973	16.424	67.1477	83.5717	0	0.1	8966	9.98946	32.8322	39.2816	72.1138	0.1	0.1	8586
Chr1	148806014	148806799	PPIAL4E	+	0.156795	NA	79.8589	NA	0	0.1	0	0.564458	NA	14.5888	NA	0.1	0.1	0
Chr1	148901844	148904054	LOC101060524	+	0.142997	54.4488	26.3223	80.7711	1.1	0.9	888	0.00647036	-15.0799	51.8261	36.7462	0.1	0.1	2268
Chr1	148928312	148953054	LOC645166	+	0.526455	38.3011	33.1652	71.4663	0.9	0.6	8333	3.36138	-1.57832	32.2912	30.7129	0.1	0.1	83988
Chr1	148250249	149109725	NBPF25P	-	1.6797	-11.8064	74.0318	62.2254	3.1	3.5	143996	2.18814	24.8787	10	34.8787	3.9	3.9	401677
Chr1	149287129	149291743	LOC388692	+	3.67078	34.212	16.9333	51.1453	2.8	2	1122	0.706266	-21.0189	78.0324	57.0134	0.1	0.1	3350
Chr1	149287450	149291743	FAM231D	+	0.0353248	36.5506	18.144	54.6946	3.1	1.7	995	0.055924	-21.2861	76.2907	55.0046	0.1	0.1	3350
Chr1	149369293	149378303	FCGR1C	+	0.0622032	16.2913	57.8224	74.1137	1.7	1.5	796	0.00647036	13.1889	4.04727	17.2361	7.6	3.1	0
Chr1	149514089	149514256	RNVU1-19	-	4988.58	NA	15.9403	NA	0.8	1.7	226	1402.44	NA	10.0497	NA	2.2	1.6	428
Chr1	149553002	149553787	PPIAL4C	+	0.156102	NA	78.3659	NA	0	0.1	0	0.569626	NA	36.2807	NA	0.1	0.1	0
Chr1	149575481	149619134	LINC00623	+	0.47529	35.799	18.0288	53.8278	0.1	3.2	19502	0.909467	26.7865	8.73606	35.5226	4.1	3.8	9715
Chr1	149576160	149651107	LINC00869	+	0.644084	60.0638	5.02644	65.0902	0.8	2.5	19701	0.53272	39.2636	1.81982	41.0834	4	3.1	11872
Chr1	149576261	149672983	LOC103091866	+	7.05371	59.289	2.72106	62.0101	0.9	2.4	25118	2.25503	45.1286	1.27606	46.4046	4	3	25460
Chr1	149754249	149764074	FCGR1A	+	0.0567392	15.8579	58.69	74.5479	1.9	1	4378	0.0697588	12.2511	5.98909	18.2402	5.1	3.6	5267
Chr1	149754244	149783928	HIST2H2BF	-	5.0194	41.6614	9.14246	50.8039	1.9	1.5	19889	71.5738	11.1062	7.22878	18.3349	3.9	1.9	20471
Chr1	149784779	149785236	HIST2H3D	-	0.305708	NA	6.38543	NA	0.6	2.8	4235	93.0242	NA	8.17601	NA	4	3.3	10604
Chr1	149804220	149804616	HIST2H4B	+	3.12017	NA	1.38532	NA	2.1	1.5	119	194.758	NA	0.195773	NA	4.9	2.5	0
Chr1	149812258	149812765	HIST2H3C	-	0.35275	NA	1.77076	NA	3	1.3	0	207.953	NA	0.399641	NA	7	2.3	0
Chr1	149813784	149814318	HIST2H2AA3	-	10.7438	NA	1.16239	NA	1.5	2.9	1513	825.731	NA	0.263077	NA	6.8	3.8	227
Chr1	149821758	149822340	HIST2H2BC	-	0.901825	NA	1.9013	NA	3.1	1.3	8579	2.97688	NA	0.253993	NA	6.9	2.9	38792
Chr1	149822627	149823161	HIST2H2AA4	+	11.0197	NA	1.39399	NA	1.4	2.9	398	855.193	NA	0.250375	NA	6.9	3.8	0
Chr1	149824180	149824687	HIST2H3A	+	0.35275	NA	1.68609	NA	3	1.3	0	219.839	NA	0.437155	NA	7.2	2.4	0
Chr1	149832329	149832725	HIST2H4A	-	2.97899	NA	1.23366	NA	2.1	1.5	199	175.29	NA	0.228227	NA	5	2.5	0
Chr1	149856009	149858232	HIST2H2BE	-	1.65754	3.08827	2.1603	5.24857	2.6	2.3	92593	4.43289	0.535556	0.27373	0.809286	5.5	2.7	217818
Chr1	149858524	149858961	HIST2H2AC	+	25.2816	NA	2.15602	NA	2.5	2.4	44653	749.963	NA	0.246812	NA	5.5	2.6	60818
Chr1	149859018	149859466	HIST2H2AB	-	9.88019	NA	1.67704	NA	1.4	3.5	70178	775.096	NA	0.247964	NA	5.6	4	147299
Chr1	149871154	149872348	BOLA1	+	2.57215	73.9348	21.9815	95.9163	0.5	1	40843	5.0339	51.3021	34.5079	85.81	2.3	0.7	59559
Chr1	149874871	149889434	SV2A	-	0.159925	72.3965	13.4398	85.8363	1.8	2	9144	0.333907	16.4898	21.7831	38.2729	3	1	70214
Chr1	149895208	149900144	SF3B4	-	1.96877	75.8105	8.20971	84.0202	0.6	1.5	51049	7.25125	54.8298	7.15286	61.9826	2.1	1.6	155112
Chr1	149900542	149908791	MTMR11	-	0.174529	60.1069	32.6746	92.7815	1.2	1.3	16338	5.62031	70.6054	0.639048	71.2444	6.4	1.4	255018
Chr1	149912228	149982686	OTUD7B	-	3.69775	87.1508	1.97488	89.1257	0.9	2.7	324357	8.3305	69.5856	1.12462	70.7102	4.4	3.2	518207
Chr1	150039349	150117505	VPS45	+	4.34956	90.8779	1.87723	92.7551	2	1.3	130931	14.0891	73.6941	0.376397	74.0705	3.8	1.7	378837
Chr1	150122169	150131825	PLEKHO1	+	1.79765	71.6747	7.54069	79.2154	1	1.9	62919	5.20904	43.4532	11.3909	54.8441	4.3	3.5	64561
Chr1	150190716	150208504	ANP32E	-	8.59089	58.3311	7.57653	65.9076	0.8	2.7	134398	40.242	49.6795	5.50128	55.1808	3.7	2.9	343448
Chr1	150230217	150237480	CA14	+	3.28138	43.4821	20.6126	64.0946	2.4	3.4	32419	0.249758	30.7776	6.04667	36.8242	5.3	2.9	52347
Chr1	150237798	150241609	APH1A	-	13.4537	59.1141	8.475	67.5891	0.6	1.9	50469	22.0475	48.6791	11.2434	59.9225	2.3	1.9	149436
Chr1	150245182	150253335	C1orf54	+	4.90886	5.33377	82.1935	87.5272	0.1	0.9	32748	0.00647036	12.8692	35.3574	48.2266	2.5	0.9	38295
Chr1	150255228	150259501	CIART	+	0.603416	68.8472	25.6099	94.4571	2.8	0.5	5398	0.100335	11.8265	34.9082	46.7347	0.1	0.1	19621
Chr1	150266261	150281414	MRPS21	+	11.512	50.2894	43.1039	93.3932	0.6	1	20124	15.2075	32.4328	41.6362	74.069	1.3	0.8	87062
Chr1	150293927	150325704	PRPF3	+	5.9882	65.7273	28.9215	94.6489	0.6	1.1	37473	23.4339	55.8832	21.2037	77.087	1.9	1.3	224287
Chr1	150336989	150449041	RPRD2	+	3.27333	86.9502	1.12331	88.0735	1.3	3.1	307744	3.96021	64.0157	0.400266	64.4159	4.4	3.1	968397
Chr1	150459839	150480085	TARS2	+	5.60323	61.9784	30.5307	92.5091	0.7	1	29481	10.2256	62.003	13.8105	75.8135	2.3	1.6	184580
Chr1	150464820	150464886	MIR6878	+	0	NA	97.9055	NA	0	0.1	0	0.00647036	NA	80.9121	NA	0.1	0.1	486
Chr1	150480486	150486265	ECM1	+	4.91312	4.26022	80.3833	84.6435	0.6	2	25113	0.46658	0.0799277	39.9443	40.0242	4.5	3.9	58209
Chr1	150488232	150490508	LINC00568	+	0.202047	67.532	10.4727	78.0047	0.9	1.4	8242	0.361601	1.23576	6.41966	7.65542	3	2.2	113282
Chr1	150521844	150533412	ADAMTSL4	+	1.56111	70.343	5.54191	75.8849	1.1	1.1	141487	0.140457	27.8741	5.56799	33.4421	3.1	2.1	130571
Chr1	150524404	150524490	MIR4257	+	0	NA	53.2816	NA	0	1.2	2013	0.00647036	NA	17.4663	NA	1.3	1.2	1070
Chr1	150533370	150547028	ADAMTSL4-AS1	-	0.479764	-2.37704	55.8736	53.4965	0	0.1	384965	0.677012	-16.4378	27.2389	10.8011	0.1	0.1	605793
Chr1	150547026	150552214	MCL1	-	21.777	-6.7699	10.6064	3.83654	0.6	5.1	276294	39.468	-5.56809	6.44916	0.881075	5.6	5.1	258672
Chr1	150594598	150602098	ENSA	-	15.1348	73.289	11.1348	84.4238	0.8	1.5	95498	57.5851	48.8558	0.365506	49.2213	3.4	2	116940
Chr1	150618700	150669672	GOLPH3L	-	4.30985	75.8678	13.7128	89.5806	1.3	1.5	55196	11.0921	57.7827	7.08609	64.8688	2.5	1.6	425184
Chr1	150670534	150693364	HORMAD1	-	0.158404	-5.61372	94.5841	88.9703	0	0.1	11144	0.00647036	-34.4287	74.3664	39.9378	0.1	0.1	66451
Chr1	150702671	150738433	CTSS	-	16.2468	32.3997	58.6565	91.0562	0.9	2.3	74841	4.60376	4.09735	41.8083	45.9057	3.1	2.7	160115
Chr1	150768683	150780917	CTSK	-	1.22857	22.3692	70.652	93.0212	0	2	9697	0.94882	-16.9799	67.4019	50.422	0.1	0.1	45038
Chr1	150782180	150849244	ARNT	-	9.66978	81.3928	9.03922	90.432	0.7	2.9	189447	6.555	71.2616	1.37154	72.6331	3.9	2.7	386145
Chr1	150898814	150937220	SETDB1	+	4.43138	59.1622	34.1038	93.266	1.1	0.9	80038	11.3594	49.8117	25.533	75.3447	1.6	0.9	226172
Chr1	150937648	150947479	CERS2	-	36.3362	43.7167	17.9203	61.637	0.5	4.5	223865	19.3642	26.1417	0.958445	27.1002	5.9	4.7	739103
Chr1	150954498	150968114	ANXA9	+	4.28202	36.4315	54.4571	90.8886	0.7	0.9	30864	1.16986	40.708	17.6532	58.3612	3.6	0.6	171001
Chr1	150969300	150980854	FAM63A	-	3.32276	60.041	9.27007	69.311	1.2	0.6	106273	2.94527	31.025	1.60898	32.6339	5	3.8	406263
Chr1	150980972	151008189	PRUNE	+	1.70175	82.7011	5.73586	88.437	0.6	1.2	98446	3.22675	58.7023	0.826313	59.5286	4.9	1.1	528716
Chr1	151009028	151020076	BNIPL	+	0.396086	3.78302	89.9644	93.7474	1.1	0.9	7984	0.419462	8.50256	41.2824	49.7849	3.1	1.3	83281
Chr1	151020258	151023871	C1orf56	+	0.738826	56.8672	22.6481	79.5153	0.5	1.5	28474	0.877677	25.8263	4.2701	30.0964	2.5	1.6	100616
Chr1	151023446	151032125	CDC42SE1	-	5.48816	78.4599	3.62206	82.0819	1.9	1.5	105300	24.0529	44.5249	0.926429	45.4513	5	2.7	318709
Chr1	151032150	151040973	MLLT11	+	0.260001	85.2017	3.49314	88.6948	1.4	1.9	42831	0.463944	60.1467	0.862485	61.0092	4.9	2.3	85758
Chr1	151043079	151091007	GABPB2	+	4.75615	50.3862	41.6978	92.084	0.6	1.8	81433	8.51794	47.2656	15.3918	62.6574	2.9	2.4	423548
Chr1	151104162	151119140	SEMA6C	-	0.304702	68.3686	12.2606	80.6292	1.7	1.4	17596	0.282755	36.1767	24.7372	60.9139	3	0.5	106359
Chr1	151129104	151132225	TNFAIP8L2	+	0.442071	29.8313	58.2407	88.072	1.5	1.4	21868	0.125953	47.551	18.9373	66.4882	3.2	1.7	15451
Chr1	151129104	151142773	TNFAIP8L2-SCNM1	+	0.420199	2.53662	58.2407	60.7773	1.5	1.4	76991	0.0558364	27.8457	18.9373	46.7829	3.2	1.7	166056
Chr1	151132223	151138424	LYSMD1	-	1.63312	83.0478	3.75466	86.8025	1.1	1.7	39986	4.54741	64.3034	2.99888	67.3022	3.2	1.7	63585
Chr1	151138497	151142773	SCNM1	+	1.64258	85.5256	5.38866	90.9143	1.7	1.1	14556	5.39801	64.9386	5.14255	70.0812	3.2	1.5	86184
Chr1	151142462	151148547	TMOD4	-	0.14032	3.16379	87.403	90.5667	0.4	1.7	4022	0.117172	-3.96693	65.5774	61.6104	1.7	1.3	32376
Chr1	151148775	151162689	VPS72	-	5.44228	76.499	14.249	90.748	0.8	1.5	25663	48.2278	70.9946	5.20471	76.1993	2.5	1.5	147348
Chr1	151171020	151222007	PIP5K1A	+	3.10903	82.3251	9.97827	92.3034	0.8	2	84717	9.287	75.2853	0.451257	75.7365	6.1	2.3	459234
Chr1	151227196	151239954	PSMD4	+	33.0879	62.7268	24.9011	87.6279	0.6	1.5	70640	192.956	44.5416	22.4967	67.0384	2.3	1.8	206975
Chr1	151254790	151264381	ZNF687	+	0.748384	82.6205	1.4567	84.0772	1.3	1.7	71740	4.95017	66.1447	1.32679	67.4715	3.2	1.9	290389
Chr1	151264272	151300191	PI4KB	-	2.30052	75.6035	12.4225	88.026	0.9	1.9	171521	11.0586	66.0052	0.733957	66.7391	3.7	2	356337
Chr1	151313115	151319769	RFX5	-	1.99365	73.9817	9.79185	83.7736	1	1	44413	5.15837	52.431	4.76486	57.1959	2	1.1	78444
Chr1	151336777	151345210	SELENBP1	-	42.008	19.3994	53.3987	72.7981	0.4	1.8	89237	5.31809	41.9839	16.591	58.5749	2.4	1.8	247516
Chr1	151372040	151374412	PSMB4	+	22.3433	77.1301	17.3603	94.4904	0.6	1.3	39874	51.2278	66.5586	9.34985	75.9085	1.8	1.2	118195
Chr1	151375199	151431941	POGZ	-	3.36138	73.2133	10.5383	83.7516	0.4	2.5	100955	4.86687	59.5445	3.16453	62.709	2.8	2.4	434941
Chr1	151483861	151511167	CGN	+	9.31571	79.8992	4.11036	84.0095	1.6	3.5	266784	5.6524	57.1656	0.647756	57.8134	6.2	3.7	539847
Chr1	151512780	151556059	TUFT1	+	0.715452	84.694	3.83102	88.525	1	1.6	103731	12.7478	54.5118	0.362768	54.8745	4	3.1	781139
Chr1	151518271	151518367	MIR554	+	0	NA	90.3235	NA	0	0.1	96	0.00647036	NA	62.6191	NA	0.1	0.1	1608
Chr1	151584661	151671559	SNX27	+	3.36742	86.5586	3.50577	90.0643	1	1.4	123853	8.93291	56.7744	1.91022	58.6846	2.6	1.7	757641
Chr1	151672533	151689296	CELF3	-	0.123315	44.5572	32.0892	76.6465	1.2	0.9	8557	0.32875	33.5561	12.727	46.2831	2	1.2	191784
Chr1	151694012	151702082	RIIAD1	+	0	69.6833	12.6928	82.3761	1.5	0.7	7736	0.00647036	26.2254	20.7658	46.9912	3.4	0.4	59785
Chr1	151735444	151743806	OAZ3	+	0.553399	80.8508	6.25061	87.1014	0.4	1.9	37174	3.03357	54.596	5.43622	60.0322	2.9	2.5	147189
Chr1	151732122	151736040	MRPL9	-	13.0079	87.2492	6.55801	93.8072	1.1	1.1	20857	65.5076	74.693	1.17038	75.8634	2.9	1.1	98099
Chr1	151744040	151763010	TDRKH	-	1.04278	82.7988	3.18322	85.982	1.5	1.1	14461	4.29613	40.3496	2.31922	42.6688	2.9	0.9	110560
Chr1	151772764	151777882	LINGO4	-	0.148329	29.4865	52.0108	81.4973	1.6	1.1	4803	0.0818298	24.6127	3.69611	28.3088	2.4	1.5	30126
Chr1	151778546	151804348	RORC	-	14.6598	41.7022	31.3876	73.0898	2.5	3.6	217390	0.218507	17.0276	5.33	22.3576	4.5	3.4	219483
Chr1	151810944	151816641	LOC100132111	+	22.9626	39.1199	15.0333	54.1532	0.8	2.1	16077	8.76095	55.044	20.8507	75.8947	3.3	0.6	30748
Chr1	151810338	151813033	C2CD4D	-	0.0743032	-17.3742	30.4926	13.1184	0	3.1	14523	0.357328	-58.0671	79.9244	21.8573	1.4	0.3	15243
Chr1	151819576	151826173	THEM5	-	0.128405	-13.2477	91.1159	77.8682	0	0.1	4776	0.308422	-9.65769	49.9693	40.3116	0.6	0.3	57594
Chr1	151843342	151882361	THEM4	-	1.16699	84.3954	6.20712	90.6025	0.9	1.3	55669	4.20366	56.1756	7.21523	63.3908	2	1.5	495260
Chr1	151955385	151966714	S100A10	-	6.85564	53.2973	12.9726	66.2698	0.4	3.8	118988	633.699	12.4826	1.45721	13.9398	7.7	5.1	1072024
Chr1	151990753	151994985	NBPF18P	+	0.151291	-0.59163	85.0003	84.4087	0	0.1	1194	0.439235	-3.97634	23.2383	19.2619	0.1	0.1	30090
Chr1	152004981	152009511	S100A11	-	5.17277	10.5938	46.8309	57.4247	0.4	2.9	49095	186.385	17.7581	4.95062	22.7087	4	3	423856
Chr1	152056619	152061540	TCHHL1	-	0	-6.59705	68.7254	62.1283	0	0.1	1964	0.00647036	-0.0218015	2.28118	2.25937	0.1	0.1	18871
Chr1	152078792	152087930	TCHH	-	0.140564	-43.2208	54.7077	11.4869	0	0.1	6766	0.443236	48.1727	1.3425	49.5152	6.7	1.8	172850
Chr1	152126070	152131704	RPTN	-	0	10.762	76.011	86.773	5	0.3	2404	0.176138	13.9457	6.823	20.7687	3.4	2.2	36499
Chr1	152184551	152196672	HRNR	-	0.163286	4.34806	81.48	85.8281	1.6	3.1	4577	0.130844	31.8601	3.80692	35.667	5.8	3	31534
Chr1	152285934	152339168	FLG-AS1	+	0.488692	-12.8561	88.2834	75.4273	0	0.1	18507	0.455546	-12.8784	16.6966	3.81824	0.1	0.1	140068
Chr1	152274650	152297679	FLG	-	0.0609025	21.2672	62.2133	83.4805	0	0.1	4976	0.084412	10.3738	1.38917	11.763	6.4	3.9	55981
Chr1	152321212	152332482	FLG2	-	0.0871331	3.67948	79.5464	83.2258	0	0.1	5533	0.0767511	4.28533	0.549231	4.83456	5.3	0.3	52689
Chr1	152381718	152386750	CRNN	-	0	1.82954	75.0985	76.928	5	0.7	1791	0.00647036	0.895732	0	0.895732	5.9	5.1	23002
Chr1	152483319	152484653	LCE5A	+	0	-6.70458	75.3996	68.695	0	0.1	489	0.00647036	-3.67817	4.43567	0.7575	0.1	0.1	10872
Chr1	152486977	152488481	CRCT1	+	0	-18.9523	31.8207	12.8684	0	0.1	597	0.00647036	-5.49856	16.4348	10.9362	0.1	0.1	10426
Chr1	152538174	152539229	LCE3E	-	0	NA	72.9446	NA	0	0.1	708	0.00647036	NA	2.33	NA	0.1	0.1	9653
Chr1	152551859	152552980	LCE3D	-	0	NA	77.5147	NA	0	0.1	398	0.00647036	NA	4.63373	NA	0.1	0.1	8950
Chr1	152573137	152573562	LCE3C	+	0	NA	79.1496	NA	0	0.1	0	0.00647036	NA	0.277647	NA	5.7	2.8	1265
Chr1	152586286	152586574	LCE3B	+	0	NA	68.4005	NA	0	0.1	28	0.00647036	NA	4.15217	NA	5.3	0.3	2546
Chr1	152595309	152595579	LCE3A	-	0	NA	38.9778	NA	1	0.5	638	0.00647036	NA	5.33622	NA	5.1	5.1	3096
Chr1	152635886	152637135	LCE2D	+	0.0384404	NA	74.3025	NA	5	0.7	199	0.00647036	NA	1.271	NA	4.8	4.2	6938
Chr1	152647790	152649049	LCE2C	+	0.038468	-4.5765	85.0815	80.505	0	0.1	597	0.00647036	-1.02893	1.02893	0	7.5	2.5	4741
Chr1	152658598	152659876	LCE2B	+	0	-9.21875	78.6988	69.48	0	0.1	376	0.00647036	-2.94921	2.94921	0	5.1	0.1	5499
Chr1	152670839	152671918	LCE2A	+	0	-3.92885	70.5988	66.67	5	0.1	397	0.00647036	-1.349	1.349	0	5.7	1.7	7105
Chr1	152681522	152681910	LCE4A	+	0	NA	88.4059	NA	0	0.1	398	0.00647036	NA	1.44167	NA	7.7	2.8	2461
Chr1	152691997	152692905	C1orf68	+	0	NA	77.6945	NA	0	0.1	199	0.00647036	NA	1.95714	NA	8.4	4.7	6364
Chr1	152730505	152734529	KPRP	+	0	29.3334	56.5361	85.8695	1.4	1	1604	0.00647036	2.9045	3.0005	5.905	1.4	1.1	18524
Chr1	152748847	152749445	LCE1F	+	0	NA	72.4609	NA	0	0.1	106	0.00647036	NA	4.10053	NA	6.2	1.2	1980
Chr1	152758752	152760901	LCE1E	+	0	2.83333	60.12	62.9533	1.8	3.2	818	0.00647036	0.581042	0.520833	1.10187	2.7	2.2	6797
Chr1	152769226	152770657	LCE1D	+	0	-17.153	54.8222	37.6692	1.5	3.8	331	0.00647036	-0.0179333	0.7096	0.691667	6.1	2.4	6648
Chr1	152777310	152779107	LCE1C	-	0	8.23369	58.194	66.4277	0	0.1	648	0.00647036	-3.19595	6.30929	3.11333	0.1	0.1	9086
Chr1	152784446	152785585	LCE1B	+	0	28.7532	68.3068	97.06	5	1.9	199	0.00647036	-0.384615	0.384615	0	5	2.7	5817
Chr1	152799948	152800573	LCE1A	+	0	NA	58.023	NA	5	1.1	0	0.00647036	NA	0.276571	NA	7	2	3705
Chr1	152815329	152816459	LCE6A	+	0	24.2727	67.3923	91.665	0.1	2.5	597	0.00647036	-1.97667	2.75667	0.78	6.2	5.1	4774
Chr1	152850797	152857523	SMCP	+	0	37.1939	51.6843	88.8782	1.6	3.1	13333	0.00647036	13.7763	1.79	15.5663	6.4	2.3	28319
Chr1	152881038	152884362	IVL	+	0	-7.74222	78.9878	71.2456	0	0.1	1393	0.00647036	-0.875	1.975	1.1	0.1	0.1	16869
Chr1	152943127	152945069	SPRR4	+	0	-9.90815	87.3353	77.4271	0	0.1	199	0.00647036	-1.72959	3.66759	1.938	0.1	0.1	7276
Chr1	152956563	152958290	SPRR1A	+	0	11.3728	72.3542	83.727	0	0.1	803	0.00647036	-2.05375	3.75875	1.705	0.1	0.1	4818
Chr1	152974222	152976332	SPRR3	+	0	4.29293	58.6596	62.9525	0	0.1	1712	0.00647036	-1.00143	4.54032	3.53889	5.1	0.1	10923
Chr1	153003678	153005376	SPRR1B	+	0	-45.2925	68.32	23.0275	2	2.9	480	0.00647036	-1.023	1.023	0	4.8	4	5503
Chr1	153012200	153013594	SPRR2D	-	0	-38.4882	59.2582	20.77	0	3.8	528	0.00647036	-1.72895	1.72895	0	5.7	1.1	3706
Chr1	153028595	153029988	SPRR2A	-	0	-21.5202	65.1477	43.6275	0	0.1	199	0.00647036	-1.782	5.116	3.334	0.1	0.1	3504
Chr1	153042717	153044084	SPRR2B	-	0	-31.835	65.17	33.335	1.2	4.1	199	0.00647036	-2.61929	2.61929	0	7.2	2.2	4230
Chr1	153065610	153067004	SPRR2E	-	0	-1.425	48.09	46.665	0	0.1	597	0.00647036	-1.5625	1.5625	0	0.1	0.1	4910
Chr1	153084612	153085989	SPRR2F	-	0	-24.5467	75.1967	50.65	0	0.1	0	0.00647036	-7.99393	7.99393	0	5.8	0.8	5723
Chr1	153112593	153113969	SPRR2C	-	0	2.0899	75.1518	77.2417	0	0.1	805	0.00647036	-4.01847	5.88647	1.868	5.1	5.1	5453
Chr1	153122057	153123427	SPRR2G	-	0	22.8142	60.3575	83.1717	0	0.1	39	0.00647036	-0.173333	0.173333	0	5.7	1.9	4563
Chr1	153146993	153164152	LOC101928009	+	0	-10.1118	80.2432	70.1314	0	0.1	4974	0.00647036	-0.329667	5.6868	5.35713	0.1	0.1	51187
Chr1	153175905	153177601	LELP1	+	0	11.9869	66.3553	78.3422	2.7	2.5	464	0.00647036	4.19483	0.9365	5.13133	8.4	3.4	4962
Chr1	153190059	153191793	PRR9	+	0.0684624	-23.1752	74.5977	51.4225	1.1	5.1	1668	0.0745062	5.46048	1.11577	6.57625	7.2	4.6	8895
Chr1	153232178	153234600	LOR	+	0.0636965	-73.3668	83.2768	9.91	0	0.1	1990	0.087484	40.7054	5.12333	45.8288	5.9	0.9	4312
Chr1	153270337	153283194	PGLYRP3	-	0	5.77888	74.2752	80.054	5	0.9	4378	0.00647036	5.13198	2.22083	7.35281	5.7	2.4	50976
Chr1	153302596	153321022	PGLYRP4	-	0	7.27565	65.1074	72.3831	0.6	0.1	7697	0.00647036	2.45881	0.88463	3.34344	2.3	0.9	69718
Chr1	153330329	153333503	S100A9	+	4.44011	20.8615	66.8374	87.6988	5	0.5	40303	0.00647036	-0.459964	8.04083	7.58087	1.7	0.7	17026
Chr1	153346183	153348075	S100A12	-	0.211501	-5.97888	78.0749	72.096	1.2	0.2	14090	0.00647036	-0.339	2.053	1.714	6.7	2.9	7945
Chr1	153362507	153363664	S100A8	-	2.35413	-47.4626	64.1326	16.67	1.7	2.1	11823	0.00647036	-0.4604	0.4604	0	4.8	2.7	8062
Chr1	153388999	153395701	S100A7A	+	0	1.11572	55.8662	56.9819	0.8	1	4378	0.00647036	2.56805	0.243333	2.81138	5.9	4.7	36660
Chr1	153409470	153412503	S100A7L2	-	0	-3.27853	67.7307	64.4522	1.5	1.6	995	0.00647036	-0.207375	0.568	0.360625	6.3	5.1	17046
Chr1	153430219	153433137	S100A7	-	0	-0.630313	69.9758	69.3455	0	0.1	1037	0.29349	-1.37979	1.86667	0.486875	4.6	4.6	15106
Chr1	153507075	153508717	S100A6	-	7.38457	80.5243	12.2	92.7243	0.8	0.8	25780	1869.04	-0.455594	1.65934	1.20375	5.1	4.3	320630
Chr1	153509622	153514241	S100A5	-	0	3.45597	85.4845	88.9404	0	0.1	8872	1.10947	16.2913	31.6357	47.927	0.1	0.1	203687
Chr1	153516094	153518282	S100A4	-	0.863175	10.1734	72.678	82.8514	0.4	3.4	13720	313.288	12.4135	8.72956	21.1431	2.2	1.6	363865
Chr1	153519808	153521734	S100A3	-	0.18585	6.80749	78.4995	85.307	0.7	0.6	1510	88.6909	0.19033	5.28482	5.47515	3.2	2.4	464852
Chr1	153533584	153538306	S100A2	-	0	7.47196	82.1598	89.6317	1.2	0.3	2807	4.15384	49.1288	8.69153	57.8204	5.3	1	401369
Chr1	153579366	153585514	S100A16	-	10.5249	13.9627	41.1869	55.1497	0.4	1.5	221533	25.1906	16.9744	4.88596	21.8604	5.5	4.7	206910
Chr1	153586731	153588808	S100A14	-	1.17843	38.4529	59.6	98.0529	1.3	0.8	13164	0.699171	32.4776	34.7968	67.2744	1.5	0.3	20991
Chr1	153600872	153604513	S100A1	+	0.496384	37.196	48.8792	86.0752	1.9	0.3	10514	0.546691	34.6954	5.42942	40.1249	3.2	1.5	41188
Chr1	153606457	153618782	CHTOP	+	4.20403	70.7258	16.6436	87.3694	0.7	1.4	102326	14.2844	45.7859	6.16011	51.946	3	2.2	360280
Chr1	153591275	153606568	S100A13	-	15.2208	64.6952	12.6806	77.3758	1.2	0.9	68987	65.6395	49.4129	2.05521	51.4681	3	1	347565
Chr1	153631129	153634328	SNAPIN	+	3.96021	70.0726	17.1567	87.2293	0.4	1.2	32812	15.4228	38.692	9.39331	48.0853	2.1	1.6	103523
Chr1	153634263	153643504	ILF2	-	15.3626	86.2106	2.0377	88.2483	1.3	1.1	35617	145.754	58.2545	0.836863	59.0914	2.8	1.4	118160
Chr1	153651163	153666468	NPR1	+	1.21869	75.3355	3.275	78.6105	1.4	1.8	15613	0.435528	21.5743	12.8198	34.3941	6.5	5.1	117462
Chr1	153662180	153662269	MIR8083	-	0	NA	88.4986	NA	0	0.1	0	0.00647036	NA	66.4777	NA	0.1	0.1	439
Chr1	153700566	153746555	INTS3	+	5.01023	60.5151	26.8473	87.3625	0.7	1.4	271827	10.2873	44.5484	21.3822	65.9307	1.9	1.3	449442
Chr1	153747767	153752633	SLC27A3	+	2.58392	60.5456	6.90878	67.4543	0.6	1.4	51823	1.11518	36.1087	3.10552	39.2142	3.2	1.4	51781
Chr1	153777202	153895451	GATAD2B	-	2.64523	89.2907	1.55523	90.8459	1.2	2.1	160573	3.67894	66.9353	1.54194	68.4773	4.3	3	734556
Chr1	153901976	153919154	DENND4B	-	0.622452	87.4408	4.15526	91.596	0.7	1.8	110849	1.51234	75.2801	1.534	76.8141	3.2	1.8	194000
Chr1	153920147	153931132	CRTC2	-	0.90776	82.9347	3.62375	86.5584	0.7	1.5	111697	2.16833	62.4037	1.60984	64.0135	2.8	1.7	234471
Chr1	153934826	153934896	MIR6737	-	0	NA	28.9492	NA	0	0.1	1327	0.00647036	NA	7.83341	NA	2.9	0.5	6526
Chr1	153940314	153946840	CREB3L4	+	1.10755	89.4998	2.81181	92.3116	1.4	1.2	31626	3.51893	50.2751	14.3238	64.5989	2.5	0.6	66037
Chr1	153931574	153940660	SLC39A1	-	9.28465	39.8635	2.99068	42.8542	0.8	1.8	219033	60.5253	7.61682	15.5771	23.1939	2.6	2.4	609104
Chr1	153946744	153950451	JTB	-	22.3051	82.536	4.14429	86.6803	1.2	1.6	61850	79.3142	39.2205	0.84129	40.0618	3.9	2.1	139622
Chr1	153954092	153958853	RAB13	-	23.0479	71.6317	18.2129	89.8446	1	1.7	32995	68.8686	71.4396	1.5827	73.0223	3.5	1.8	103853
Chr1	153963238	153964631	RPS27	+	288.342	64.6922	29.7528	94.445	0.4	1.1	47335	1456.11	4.39122	19.7121	24.1033	2.4	2	90449
Chr1	153965167	154127592	NUP210L	-	0.0612868	7.10939	81.3534	88.4628	3.4	0.2	80499	0.310922	-7.66953	46.6276	38.958	1.5	0.2	837231
Chr1	154127779	154164611	TPM3	-	23.4574	7.86197	65.6678	73.5297	3.1	0.5	144275	311.003	42.7015	3.69389	46.3954	4.2	1.2	617963
Chr1	154166140	154166219	MIR190B	-	0	NA	58.3021	NA	1.4	1.9	79	0.00647036	NA	4.82094	NA	4.2	2.8	472
Chr1	154171561	154178841	C1orf189	-	0	-3.4509	90.6143	87.1634	0.5	0.6	9289	0.00647036	-16.4698	64.8382	48.3684	1.1	0.4	60206
Chr1	154192647	154243986	UBAP2L	+	6.36878	84.9334	1.16303	86.0965	1.2	2.9	173402	12.1317	63.9091	1.0486	64.9577	5.5	4	619387
Chr1	154179182	154193273	C1orf43	-	24.9645	90.1937	1.20836	91.4021	2.1	1.9	99856	77.3838	61.3786	0.974087	62.3527	5.8	2.3	467278
Chr1	154245038	154248355	HAX1	+	16.853	75.947	15.8118	91.7589	1	1	26543	90.0937	53.3654	8.13188	61.4973	2.4	1	90132
Chr1	154293591	154297801	AQP10	+	0.115444	-39.8824	80.5739	40.6915	0	0.1	5456	0.00647036	-12.5626	20.1719	7.60932	1.6	0.9	63823
Chr1	154298035	154323780	ATP8B2	+	0.500232	68.7976	5.82175	74.6193	1.1	1.4	49750	1.59422	36.6766	3.73031	40.4069	4.6	3.5	390396
Chr1	154377668	154441926	IL6R	+	11.5259	71.3456	4.89362	76.2392	0.6	4.4	1120248	3.95593	43.8533	1.76668	45.6199	6.6	5.1	2214585
Chr1	154451953	154474526	SHE	-	1.67282	58.7942	15.3105	74.1046	1.2	0.9	90025	0.193897	-32.6681	59.5527	26.8846	0.1	0.1	93000
Chr1	154474694	154520623	TDRD10	+	0.200887	68.3543	16.809	85.1632	1	1.1	49061	0.120773	-33.6189	60.5243	26.9054	0.1	0.1	213824
Chr1	154521050	154531120	UBE2Q1	-	5.67611	75.9412	1.97171	77.9129	1.4	2.4	41232	13.8569	52.4396	0.651968	53.0915	4.9	2.4	161799
Chr1	154540256	154552353	ChrNB2	+	0.125625	70.5571	11.465	82.0222	0.8	1.2	10474	0.211964	40.4756	7.5402	48.0158	5	3.3	58620
Chr1	154554533	154600456	ADAR	-	19.7803	70.8786	2.40047	73.2791	0.7	1.6	192108	39.6957	55.7562	0.761677	56.5178	6.5	1.5	537120
Chr1	154669941	154842754	KCNN3	-	0.129874	48.2494	31.4308	79.6803	0.8	3.2	151919	0.510341	17.5864	7.34517	24.9316	3.7	1.7	1448071
Chr1	154897207	154909484	PMVK	-	11.1777	82.5005	4.98344	87.4839	1.1	1.1	186126	15.1094	63.5048	0.809029	64.3138	2.5	1.1	261991
Chr1	154916558	154928567	PBXIP1	-	7.05462	70.3061	11.3958	81.7019	1.2	1.4	57927	11.7134	18.8915	5.41542	24.3069	5.8	4.3	102081
Chr1	154929501	154934258	PYGO2	-	1.29912	83.0016	4.04858	87.0502	1.2	1.2	36264	6.85332	56.9023	1.0198	57.9221	4.9	1.3	114531
Chr1	154934773	154946959	SHC1	-	4.17522	57.2501	0.818494	58.0686	1.9	2.3	291808	15.297	22.624	0.265308	22.8893	7.1	4.8	892108
Chr1	154947117	154951725	CKS1B	+	8.84169	42.8633	0.777041	43.6403	2.3	1.8	124307	100.874	21.1916	0.216699	21.4083	7.1	2.2	262057
Chr1	154948168	154948259	MIR4258	+	0	NA	2.91838	NA	3.5	0.8	5662	0.00647036	NA	0.458148	NA	6.2	1.2	15568
Chr1	154955769	154965587	FLAD1	+	2.90123	70.216	18.1466	88.3625	0.9	1.4	30454	13.8818	32.4566	13.2247	45.6813	2.8	2	221399
Chr1	154966061	154966791	LENEP	+	0	NA	85.2911	NA	0	0.1	1194	0.751471	NA	26.72	NA	4.9	3.3	22119
Chr1	154975105	154991001	ZBTB7B	+	2.68101	49.549	1.03992	50.5889	3.5	2.3	305084	7.85734	16.4313	0.814251	17.2456	8.6	5.1	1415259
Chr1	154991002	155006257	DCST2	-	0.0461872	-7.63381	92.6722	85.0384	0	0.1	28437	0.0850647	-13.4357	54.7818	41.3461	0.1	0.1	222718
Chr1	155006281	155023406	DCST1	+	0.0956702	-25.6483	92.6311	66.9828	0	0.1	85592	0.152972	-19.2326	53.5077	34.2751	0.1	0.1	415995
Chr1	155023747	155035252	ADAM15	+	1.16218	71.634	2.01208	73.6461	1.5	1.6	25854	18.7252	35.4465	0.316634	35.7632	5	2.5	269861
Chr1	155036212	155042029	EFNA4	+	0.402252	83.5359	6.54603	90.0819	2.5	1.4	14368	2.0267	65.7967	0.444372	66.241	5.1	1.6	108716
Chr1	155017667	155036467	LOC100505666	-	0.21958	39.1654	7.05115	46.2166	1.1	2.8	90196	0.987565	21.4437	0.635628	22.0793	5.1	3.8	596138
Chr1	155051347	155060014	EFNA3	+	1.49891	-0.234174	9.21043	8.97626	0.5	4.4	61798	0.76628	-1.24096	4.32777	3.08681	6.1	4.6	234550
Chr1	155100348	155107386	EFNA1	+	14.4881	31.9199	1.79142	33.7113	2	3.5	366523	6.14194	7.49911	0.76445	8.26356	5.3	3	369114
Chr1	155107819	155111334	SLC50A1	+	7.28516	40.0029	3.12837	43.1312	2	1.7	122672	19.1966	18.3017	0.254545	18.5562	4.4	2.1	289719
Chr1	155112366	155112996	DPM3	-	7.98008	2.90896	22.091	25	0.5	1.2	50373	20.4281	0.345135	3.65486	4	2.6	1.6	108683
Chr1	155141883	155145804	KRTCAP2	-	6.58014	79.8557	5.63082	85.4865	1.9	1.1	31125	12.9573	45.8653	10.2127	56.078	1.5	1	150494
Chr1	155146262	155157447	TRIM46	+	0.221061	77.1374	6.14014	83.2775	1.4	1.6	6595	0.428737	38.4858	12.1374	50.6231	3	1.6	100279
Chr1	155158299	155162706	MUC1	-	0.24299	61.0934	26.5388	87.6322	2.7	0.4	5263	1.22309	44.2885	13.5665	57.855	3.5	0.7	54436
Chr1	155164967	155165063	MIR92B	+	0	NA	13.5563	NA	2.6	0.6	108	0.00647036	NA	4.23414	NA	3.6	0.7	1264
Chr1	155165378	155177772	THBS3	-	0.870417	68.4565	17.9087	86.3652	2	1.4	19438	1.6094	46.161	3.58952	49.7506	3.3	1.3	96987
Chr1	155178489	155183630	MTX1	+	2.48518	77.6919	8.96146	86.6534	2.1	1.4	55881	8.91103	67.4683	2.57305	70.0413	3.3	1.4	124351
Chr1	155183615	155197325	GBAP1	-	0.515332	75.7167	12.8254	88.5421	0.7	1.3	35250	1.71143	32.9152	10.9583	43.8735	1.9	1.4	341279
Chr1	155204238	155214653	GBA	-	2.65426	68.9636	15.9585	84.9221	0.6	1.3	43533	5.38301	53.6125	7.9986	61.6111	2.7	2.1	205512
Chr1	155216995	155225274	FAM189B	-	0.290537	54.9104	15.7847	70.6951	0.9	1.1	22354	1.11454	37.0471	5.15642	42.2035	3.3	1.9	217650
Chr1	155225769	155232176	SCAMP3	-	3.56919	72.3755	14.4059	86.7814	0.7	1.4	39236	21.1102	51.1586	10.3728	61.5314	2.6	1.7	188151
Chr1	155232658	155243281	CLK2	-	4.06477	70.568	20.6297	91.1977	0.6	1.2	49573	7.74228	75.1756	3.97513	79.1508	2.4	1.1	163482
Chr1	155247217	155259639	HCN3	+	0.601739	80.7258	3.72757	84.4533	0.5	1.4	27311	0.386084	46.0103	4.40294	50.4132	2.9	2.5	106866
Chr1	155259083	155271225	PKLR	-	19.5116	10.5416	65.874	76.4156	0.4	1.6	63059	0.229624	17.6032	35.7406	53.3438	1.3	1.1	74122
Chr1	155278538	155290457	FDPS	+	40.242	60.8034	20.2188	81.0223	0.7	1.6	90401	86.876	42.0582	3.51581	45.574	3	1.8	227955
Chr1	155290639	155300909	RUSC1	+	0.365437	-20.842	52.6701	31.8281	0.9	0.5	78554	4.19492	11.8037	2.82188	14.6255	6.4	5.1	518936
Chr1	155290250	155293938	RUSC1-AS1	-	3.70073	36.0702	1.33553	37.4057	1.3	2.1	54662	6.12577	1.90926	0.307671	2.21693	6.9	4.8	262397
Chr1	155316140	155316236	MIR555	-	0	NA	91.647	NA	2.8	0.8	141	0.00647036	NA	79.8832	NA	0.1	0.1	375
Chr1	155402970	155404053	POU5F1P4	+	0.133624	-7.17928	95.7313	88.552	0.3	1.1	379	0.202691	-4.27864	82.992	78.7133	0.1	0.1	4290
Chr1	155531771	155533735	ASH1L-AS1	+	0.342785	-4.908	6.54	1.632	1.4	2.7	89118	1.58685	-0.637712	0.89661	0.258898	6	4	338807
Chr1	155305051	155532324	ASH1L	-	8.2395	90.8387	3.11735	93.9561	2	2	229812	13.6348	74.0568	0.649127	74.7059	5.9	2.6	1462846
Chr1	155579960	155584758	MSTO1	+	1.20398	75.8762	17.0555	92.9317	0.7	1.2	2598	2.80847	56.9372	15.2612	72.1984	1.8	1.2	9097
Chr1	155579978	155584616	MSTO2P	+	0.034964	75.9642	17.0555	93.0197	0.7	1.2	2447	0.806753	56.9241	15.2612	72.1853	1.8	1.2	8680
Chr1	155629232	155658823	YY1AP1	-	13.2325	77.9117	10.6775	88.5892	0.9	2.3	75937	20.8914	71.8237	0.436182	72.2599	4.2	2.5	397655
Chr1	155658881	155708800	DAP3	+	15.7731	80.2269	12.2755	92.5025	2.3	0.9	45960	72.0131	69.3232	0.448528	69.7717	4.3	1.8	391886
Chr1	155715558	155720479	MSTO2P	+	0.517533	79.2649	10.8343	90.0991	0.8	1.2	1605	1.92072	58.3187	5.74245	64.0612	1.9	1.1	12287
Chr1	155719448	155829191	GON4L	-	4.55068	74.6434	16.2223	90.8657	2.4	0.7	130296	6.43153	68.8709	3.94357	72.8145	7.2	2.8	697266
Chr1	155829259	155854990	SYT11	+	0.335455	68.6892	15.3817	84.0708	0.7	2.4	32777	0.202469	30.341	5.6959	36.0369	7.1	4.4	117202
Chr1	155867598	155881193	RIT1	-	3.26055	73.6353	21.2161	94.8514	0.6	1.3	33918	14.9518	68.1414	0.711453	68.8529	3.2	2	312141
Chr1	155889699	155889833	SNORA80E	-	216.475	NA	93.1688	NA	0	0.1	327	100.32	NA	63.7024	NA	0.1	0.1	947
Chr1	155895748	155895877	SCARNA4	-	1164.19	NA	92.5696	NA	0	0.1	100	1277.7	NA	79.8326	NA	0.2	0.1	462
Chr1	155882835	155904188	KIAA0907	-	4.08432	69.7578	19.9379	89.6957	0.8	1.1	48580	12.6417	46.7495	9.90356	56.653	5	4.4	295028
Chr1	155911479	155912625	RXFP4	+	0.0972861	10.0099	83.6844	93.6943	0	0.1	4727	0.308422	-29.9262	32.0904	2.16429	1.4	0.1	96365
Chr1	155921063	155921127	MIR6738	-	0	NA	97.1733	NA	0	0.1	128	0.00647036	NA	93.0748	NA	0.1	0.1	471
Chr1	155916629	155948336	ARHGEF2	-	1.01849	79.6347	7.94329	87.578	1.2	3.4	134433	4.7244	54.3034	0.429023	54.7325	6	4	782256
Chr1	155978838	155990758	SSR2	-	18.8145	75.1804	16.1918	91.3721	0.6	1.3	25226	94.9706	67.3231	9.70508	77.0282	1.6	1.2	137359
Chr1	156005091	156023516	UBQLN4	-	2.93001	88.3499	4.25402	92.6039	2	1.1	25396	9.45992	68.0282	0.939053	68.9672	3.5	1.3	243717
Chr1	156024516	156028301	LAMTOR2	+	7.84025	88.1445	2.47215	90.6167	2	1.1	21904	10.3775	67.3103	0.623364	67.9336	3.5	1.3	147058
Chr1	156030965	156040295	RAB25	+	0.13347	1.08023	84.9934	86.0736	0.5	1.2	22819	0.131865	-12.7175	54.0707	41.3532	0.1	0.1	72199
Chr1	156041803	156051789	MEX3A	-	0.33652	40.8067	16.8932	57.7	1.6	0.9	114947	1.10312	20.0419	14.9017	34.9437	3.3	0.3	67402
Chr1	156052336	156109880	LMNA	+	13.7971	53.5009	12.1526	65.6535	1.3	1.2	576614	289.51	11.6388	10.7978	22.4366	3.2	2.5	3302123
Chr1	156119734	156147542	SEMA4A	+	0.195423	3.58506	78.6616	82.2467	0	0.1	71455	0.129939	1.42085	41.8839	43.3047	0.1	0.1	204185
Chr1	155996957	156132001	MIR7851	-	11.4597	2.94178	62.9001	65.8419	0	2.1	917100	6.17738	-2.05848	33.9592	31.9008	3.5	0.7	4297664
Chr1	156163722	156182587	SLC25A44	+	11.293	64.7553	21.1325	85.8877	0.5	1.4	141004	9.03066	47.8859	18.4795	66.3654	1.9	1.4	162652
Chr1	156182778	156209868	PMF1	+	2.94527	69.2177	11.3235	80.5412	0.6	1.4	200016	10.2079	49.4738	7.20608	56.6799	2.5	1.9	489279
Chr1	156182778	156213123	PMF1-BGLAP	+	0.266873	69.8499	11.3235	81.1734	0.6	1.4	202205	1.88112	46.1989	7.20608	53.405	2.5	1.9	521445
Chr1	156211950	156213123	BGLAP	+	0.194988	2.7364	82.2636	85	0	0.1	526	0.0550818	14.0911	26.4589	40.55	1.5	0.2	9723
Chr1	156213111	156217908	PAQR6	-	0.123633	-30.2823	64.5341	34.2518	0.3	3	4637	0.237874	7.88027	16.7218	24.6021	3.5	2.8	39548
Chr1	156219014	156252620	SMG5	-	4.35999	86.3239	2.97237	89.2963	1.1	2	144190	10.6808	62.4478	0.396111	62.8439	4.6	3.2	373429
Chr1	156252703	156262234	TMEM79	+	0.782763	71.0206	3.08045	74.1011	2	1.1	52258	1.35672	57.892	0.407429	58.2994	4.6	1.4	196842
Chr1	156262477	156265480	C1orf85	-	1.85695	53.4535	36.8756	90.329	0.7	0.9	18445	2.07183	38.1688	29.2726	67.4414	1.2	0.7	107016
Chr1	156268414	156269428	VHLL	-	0.190788	NA	87.8352	NA	0	0.1	1791	0.319085	NA	66.5574	NA	0.1	0.1	7406
Chr1	156307104	156316785	TSACC	+	0.340512	17.0432	38.1151	55.1583	0.2	2.1	63025	1.20032	30.5672	2.34455	32.9118	4.3	2.3	212771
Chr1	156278751	156308206	CCT3	-	33.6186	78.8557	12.8661	91.7219	0.9	1.4	45970	373.228	60.8799	2.98716	63.8671	4.2	3.1	280009
Chr1	156338979	156355013	RHBG	+	0.459278	53.8612	28.2183	82.0795	0.4	0.9	6761	0.23517	14.1875	18.5979	32.7854	1	0.7	126478
Chr1	156390132	156390221	MIR9-1	-	0	NA	12.7986	NA	3.1	0.6	89	0.00647036	NA	62.5064	NA	0.1	0.1	431
Chr1	156374054	156399184	C1orf61	-	0	32.4102	10.8418	43.252	5	1.1	13853	0.00647036	25.3719	13.0741	38.446	2.5	2.3	118836
Chr1	156433512	156470634	MEF2D	-	1.18203	75.5623	0.811308	76.3736	1	2.4	249627	1.63922	49.8019	0.714312	50.5162	5.1	2.3	580782
Chr1	156495196	156542396	IQGAP3	-	0.077179	69.5277	21.3217	90.8494	0.4	1.5	23488	2.55647	66.4163	7.05411	73.4704	2.7	1.8	358221
Chr1	156549518	156556562	TTC24	+	0	-5.683	79.4153	73.7323	0.3	0.8	5373	0.0713849	-20.3941	46.3719	25.9778	0.1	0.1	55090
Chr1	156561557	156564091	APOA1BP	+	7.21315	71.2205	9.17371	80.3942	0.6	0.9	14889	30.6965	23.9035	2.85463	26.7582	4	3.3	118321
Chr1	156564099	156571279	GPATCH4	-	5.93989	67.818	21.7445	89.5625	0.6	1	11230	50.8795	38.31	10.1585	48.4684	2.5	1.9	85103
Chr1	156589085	156595517	HAPLN2	+	0	-47.8575	61.4862	13.6288	0.4	1.9	4065	0.00647036	-9.28132	28.857	19.5757	4.1	3.9	80850
Chr1	156611739	156629324	BCAN	+	0.0440908	31.7375	9.5973	41.3348	0.8	1.2	10945	1.06779	18.5412	23.6031	42.1443	1.2	0.3	132017
Chr1	156638555	156647189	NES	-	1.12437	67.479	5.82468	73.3037	1.5	1.8	26706	9.79571	19.4976	6.36723	25.8648	5.7	2.3	121430
Chr1	156669399	156675608	CRABP2	-	0.0663554	67.3721	4.16792	71.54	2.5	2.3	2996	2.16299	32.4386	0.531894	32.9705	2.9	1.3	127444
Chr1	156692412	156697705	ISG20L2	-	4.34527	56.4981	13.2687	69.7668	1.8	0.4	17577	18.2391	40.3228	0.383422	40.7062	4.7	2.8	92895
Chr1	156698262	156706752	RRNAD1	+	2.01611	87.0124	4.0063	91.0187	0.9	1.3	59326	3.88957	65.2532	0.217315	65.4705	4.7	1.5	106825
Chr1	156707093	156710923	MRPL24	-	37.0339	80.6338	10.726	91.3599	0.9	1.2	20280	176.625	80.909	2.48743	83.3964	2.7	1.3	74793
Chr1	156711898	156722240	HDGF	-	33.4892	25.0473	1.78028	26.8275	0.6	5.1	339758	276.338	16.8069	1.11766	17.9245	5.7	5.1	1263263
Chr1	156737273	156770609	PRCC	+	4.30392	86.6385	2.20526	88.8438	1.4	1.9	71218	22.4978	67.3847	0.75913	68.1439	3.6	2.2	346130
Chr1	156785541	156851642	NTRK1	+	0	-3.99459	60.0341	56.0395	0.4	1.8	72054	0.00647036	0.188942	28.0229	28.2118	2.6	0.4	372944
Chr1	156776034	156786640	SH2D2A	-	0.198283	-4.37045	57.8276	53.4572	0.6	1.6	47410	0.548528	-7.2344	37.5982	30.3638	0.1	0.1	118265
Chr1	156810664	156828712	INSRR	-	0	36.7874	15.8214	52.6088	2.8	0.6	27724	0.00647036	4.07262	32.0966	36.1693	4.3	4.3	101267
Chr1	156863522	156886226	PEAR1	+	0.373783	43.2908	16.6067	59.8975	2.2	1	98821	1.31357	0.779349	26.0323	26.8117	0.1	0.1	518917
Chr1	156890423	156902880	LRRC71	+	0.12044	7.61033	18.3685	25.9788	0.6	1.2	5938	0.2043	-13.0742	34.8811	21.8069	2	0.1	85616
Chr1	156905922	156906036	MIR765	-	0	NA	90.6231	NA	0	0.1	99	0.00647036	NA	77.0949	NA	0.1	0.1	53
Chr1	156904631	157015162	ARHGEF11	-	2.32696	81.1415	9.81743	90.9589	1.9	1.1	90530	5.49551	69.9227	2.81404	72.7367	4.3	2.2	534535
Chr1	157061834	157069600	ETV3L	-	0.0772718	0.517863	84.5817	85.0996	0.2	0.4	3383	0.43932	-6.60525	38.3465	31.7412	0.9	0.3	71031
Chr1	157098153	157098463	CYCSP52	+	0	NA	92.367	NA	0	0.1	395	0.605331	NA	78.1479	NA	0.1	0.1	3030
Chr1	157094458	157108383	ETV3	-	1.90222	80.1532	3.55291	83.7061	0.9	2.7	64899	8.45678	59.8557	1.61768	61.4733	3.6	2.7	260562
Chr1	157483166	157522310	FCRL5	-	0.0500511	9.65933	67.55	77.2093	1.9	0.9	17114	0.00647036	5.37167	2.90481	8.27649	5.5	3.4	151595
Chr1	157543538	157567870	FCRL4	-	0	-0.992713	67.2259	66.2332	0	0.1	8319	0.00647036	-2.43007	5.46783	3.03776	0.1	0.1	80936
Chr1	157647977	157670647	FCRL3	-	0.0897084	9.11153	58.3454	67.4569	0.2	5	18308	0.0773617	3.46973	0.215161	3.6849	8	5.1	73757
Chr1	157715522	157746922	FCRL2	-	0.0452485	5.22479	64.8263	70.051	0	0.1	12114	0.113942	1.07377	2.62217	3.69594	0.1	0.1	115891
Chr1	157764193	157789940	FCRL1	-	0.0884404	3.49503	61.5419	65.0369	0.2	5.1	13720	0.0840991	2.33635	0.932	3.26835	6.8	1.8	91837
Chr1	157800703	157811634	CD5L	-	27.1749	9.29234	59.858	69.1503	2.9	2.1	12846	0.123664	2.03938	1.96647	4.00585	5.7	1.7	34894
Chr1	157963062	158070052	KIRREL	+	0.476417	66.4584	9.4491	75.9075	2	1.6	230223	2.46039	41.8514	1.40172	43.2531	5.7	2	654282
Chr1	158101833	158110430	LOC646268	-	0	1.45275	80.7373	82.19	0	0.1	3631	0.00647036	13.7137	3.0658	16.7795	0.1	0.1	32924
Chr1	158149736	158156216	CD1D	+	1.23494	21.0682	21.7726	42.8408	0	0.1	36683	0.100888	0.924848	8.13667	9.06152	2.4	0.6	28982
Chr1	158223926	158228058	CD1A	+	0	-8.46609	77.9125	69.4464	0.7	5.1	2125	0.00647036	11.2646	2.44789	13.7124	5.2	0.2	14618
Chr1	158259562	158264564	CD1C	+	0.291719	8.58431	56.3944	64.9788	5	0.5	4755	0.0820068	2.72095	0.555333	3.27629	4.4	2.3	18207
Chr1	158297739	158301321	CD1B	-	0.084412	-1.65476	67.5914	65.9367	3.8	1.6	995	0.00647036	2.27864	1.32136	3.6	5.6	1.8	10721
Chr1	158323485	158327343	CD1E	+	0.181909	18.4048	52.4433	70.8482	1	2	2536	0.115896	-2.10972	2.60042	0.490698	5.5	4.6	12511
Chr1	158368311	158369256	OR10T2	-	0	NA	64.505	NA	5	1.5	7	0.00647036	NA	0.560714	NA	8.2	3.2	4796
Chr1	158389717	158390656	OR10K2	-	0	NA	53.9557	NA	2.6	1.8	340	0.00647036	NA	1.12643	NA	4.9	0.3	4583
Chr1	158435351	158436293	OR10K1	+	0	NA	72.1684	NA	0	0.1	0	0.00647036	NA	3.92259	NA	6.6	1.6	5486
Chr1	158449667	158450675	OR10R2	+	0	NA	84.582	NA	0	0.1	316	0.00647036	NA	0.226471	NA	4.1	2.2	1308
Chr1	158516917	158517895	OR6Y1	-	0	NA	67.27	NA	1.8	3	597	0.00647036	NA	3.18909	NA	0.1	0.1	5281
Chr1	158532440	158533394	OR6P1	-	0	NA	65.7111	NA	1.9	4.3	597	0.00647036	NA	3.94517	NA	7.5	2.5	4831
Chr1	158548708	158549689	OR10X1	-	0	NA	77.1587	NA	0	0.1	199	0.00647036	NA	5.19833	NA	2.8	2.7	5003
Chr1	158576228	158577170	OR10Z1	+	0	NA	51.0814	NA	3.6	1	650	0.00647036	NA	1.018	NA	6.8	5.1	5445
Chr1	158580495	158656506	SPTA1	-	0.0576643	32.2419	38.3378	70.5797	0	0.1	19502	0.174777	3.15035	0	3.15035	6.3	5.1	190918
Chr1	158669467	158670442	OR6K2	-	0	NA	74.0303	NA	0	0.1	438	0.00647036	NA	12.7144	NA	1.8	0.2	4486
Chr1	158686957	158687905	OR6K3	-	0	NA	70.0517	NA	0	0.1	0	0.00647036	NA	4.91286	NA	0.1	0.1	3452
Chr1	158724605	158725637	OR6K6	+	0	NA	74.113	NA	0	0.1	398	0.00647036	NA	1.0732	NA	4.8	3.5	1899
Chr1	158735533	158736472	OR6N1	-	0	NA	78.6211	NA	0	0.1	104	0.00647036	NA	1.8335	NA	7.3	2.3	2805
Chr1	158746471	158747425	OR6N2	-	0	NA	73.9617	NA	0	0.1	635	0.00647036	NA	0	NA	6.2	1.2	2016
Chr1	158801167	158819270	MNDA	+	3.10678	7.58091	63.7873	71.3682	4.9	1.3	24101	0.00647036	5.76202	4.84556	10.6076	5.7	0.7	17623
Chr1	158901336	158946849	PYHIN1	+	0.357212	5.06158	64.8156	69.8771	4.8	2.8	18101	0.16603	13.1777	0.793571	13.9713	8	3	51353
Chr1	158979681	159024945	IFI16	+	8.36868	34.8048	42.312	77.1168	1.1	2.1	89440	16.6212	27.3155	21.0835	48.399	3.5	3.1	104665
Chr1	159032274	159046647	AIM2	-	0.369499	14.5424	65.6476	80.1901	0.3	2.9	27215	0.1093	19.5366	1.816	21.3526	6	5.1	19580
Chr1	159141376	159172932	CADM3	+	0.0975546	50.8102	8.32206	59.1322	0.6	2.4	9609	0.0668275	-13.9903	20.1888	6.1985	0.1	0.1	47916
Chr1	159165774	159172212	CADM3-AS1	-	0.0633278	1.2379	68.405	69.6429	0.2	1.6	1990	0.00647036	11.1304	1.23852	12.3689	5.4	2.6	10784
Chr1	159173802	159176290	ACKR1	+	0.0397531	9.82539	64.1973	74.0227	0.3	1.7	1154	0.00647036	3.37672	0.154706	3.53143	5	1.2	8202
Chr1	159259503	159278014	FCER1A	+	1.37935	-7.78355	83.1967	75.4131	0	0.1	5771	0.251496	5.54182	0	5.54182	0.1	0.1	21419
Chr1	159283459	159284449	OR10J3	-	0	NA	83.8136	NA	0	0.1	345	0.00647036	NA	3.651	NA	6.2	1.2	1610
Chr1	159409511	159410600	OR10J1	+	0	NA	85.4538	NA	0	0.1	995	0.00647036	NA	2.20125	NA	7.6	2.6	2537
Chr1	159504867	159505797	OR10J5	-	0.53864	NA	76.6974	NA	1	1.7	778	0.00647036	NA	1.72	NA	3.3	1.6	1940
Chr1	159557615	159558661	APCS	+	339.957	NA	38.2692	NA	1	3.4	45382	0.363391	NA	0.630952	NA	6	1	2375
Chr1	159682078	159684379	CRP	-	35.5111	2.48793	68.561	71.049	1.5	3.9	79877	0.00647036	2.15152	11.4394	13.5909	0.1	0.1	2994
Chr1	159750758	159752333	DUSP23	+	9.71357	92.7199	4.1659	96.8858	1.1	1.1	45936	8.14383	80.4927	0.553871	81.0465	6.2	1.2	38535
Chr1	159770300	159786047	FCRL6	+	0.139258	-1.63264	79.727	78.0943	0	0.1	9417	0.0946789	-5.83214	28.1773	22.3451	0.1	0.1	38316
Chr1	159796478	159807282	SLAMF8	+	0.161929	6.87889	74.3936	81.2725	0	0.1	13910	0.074916	-15.4354	32.8606	17.4252	0.1	0.1	20432
Chr1	159804263	159825137	C1orf204	-	0.20162	52.9488	23.5408	76.4896	0.6	1.8	24068	0.173242	-7.0983	35.6685	28.5702	0.1	0.1	72986
Chr1	159824105	159832447	VSIG8	-	0	-41.196	82.5293	41.3333	0	0.1	11740	0.00647036	22.3021	17.4432	39.7453	4.1	3.3	51653
Chr1	159842153	159869906	CCDC19	-	0.0508489	30.1596	51.0726	81.2322	0.6	0.5	35796	0.557361	-10.3479	55.9358	45.5879	0.1	0.1	101997
Chr1	159887896	159895332	TAGLN2	-	13.2442	53.0703	3.85386	56.9241	0.7	3.5	212333	40.8286	17.2614	1.60067	18.8621	5.7	5.1	274639
Chr1	159896828	159915386	IGSF9	-	1.28399	78.1817	6.77898	84.9607	1	2	80928	0.363664	34.9535	7.20795	42.1614	1.4	0.5	168219
Chr1	159921281	159924044	SLAMF9	-	0.0563965	-13.8619	85.2643	71.4024	0	0.1	1194	0.00647036	13.0374	11.6096	24.647	2	0.1	8326
Chr1	159931013	159948876	LINC01133	+	0.354591	-8.76841	92.1974	83.429	0	0.1	45310	2.27276	7.36406	11.8544	19.2185	1.7	1	81902
Chr1	159997461	160001783	PIGM	-	1.38338	52.7124	1.82789	54.5403	1.1	1.9	33201	1.08979	37.6276	0.281503	37.9091	3	2	24823
Chr1	160007256	160040051	KCNJ10	-	0.450097	67.3156	11.2969	78.6125	1.2	1	21911	0.186448	0.251014	15.265	15.516	0.1	0.1	64636
Chr1	160051359	160059212	KCNJ9	+	0	5.2947	35.4888	40.7835	3.2	1	8349	0.0772275	26.6905	7.275	33.9655	5.4	2.6	18009
Chr1	160061128	160068618	IGSF8	-	3.76245	75.1517	3.81818	78.9698	1	1.3	160901	2.67305	54.0783	2.02	56.0983	2.6	1.7	39219
Chr1	160085519	160113374	ATP1A2	+	0.186525	32.5872	52.3415	84.9287	1.5	2.9	13932	0.149396	35.7766	6.25268	42.0293	6.7	4.5	143832
Chr1	160121351	160156767	ATP1A4	+	0.0376254	-4.79739	86.6653	81.8679	0	3.1	18109	0.0632865	-22.6333	49.471	26.8377	0.1	0.1	107099
Chr1	160160284	160171676	CASQ1	+	0.0665621	-1.65199	76.72	75.068	0	0.1	7642	0.00647036	20.1428	7.58485	27.7277	4.3	3.3	29661
Chr1	160175124	160185162	PEA15	+	9.05873	77.0927	4.73976	81.8325	0.9	1.4	45992	20.9887	42.2598	1.64557	43.9054	2.4	1.5	88425
Chr1	160185504	160232350	DCAF8	-	21.5811	77.3222	7.01045	84.3327	0.9	2.3	228941	10.1873	67.2305	0.541863	67.7724	3.5	2.5	211006
Chr1	160246598	160254941	PEX19	-	13.3171	62.4904	24.2594	86.7498	0.6	1.7	69689	5.26265	69.8667	2.15846	72.0252	3.9	1.5	71425
Chr1	160287054	160288260	SUMO1P3	+	2.13664	NA	94.1413	NA	0	0.1	597	1.23333	NA	80.5392	NA	0.1	0.1	993
Chr1	160313062	160328742	NCSTN	+	6.81883	88.7215	3.51845	92.2399	3	1.2	40041	4.23247	77.5492	0.601641	78.1508	4.2	1.6	63281
Chr1	160258376	160313354	COPA	-	20.8706	82.5256	6.22673	88.7524	0.8	3.4	141433	23.6562	72.965	1.22539	74.1904	4.2	3	136656
Chr1	160336860	160342638	NHLH1	+	0.091001	14.724	57.3441	72.0681	0.9	2.2	2786	0.114564	24.4323	21.7336	46.1659	1.2	0.5	11751
Chr1	160370363	160398468	VANGL2	+	0.061991	67.1292	18.198	85.3272	0.6	2.5	14726	0.0573385	-34.6063	47.487	12.8806	0.1	0.1	56624
Chr1	160454819	160493052	SLAMF6	-	0.422286	13.3842	67.5997	80.9838	0.5	2.9	33051	0.191947	-18.1346	26.157	8.02234	0.1	0.1	59853
Chr1	160510883	160549306	CD84	-	1.56833	43.5215	37.5345	81.0561	0.2	5.1	79469	0.259483	8.06958	0	8.06958	5.5	5.1	63048
Chr1	160579608	160617101	SLAMF1	-	0.143813	14.1809	68.9463	83.1272	0.5	1.5	48954	0.00647036	7.76945	10.1871	17.9565	1.7	1.7	77381
Chr1	160648535	160681641	CD48	-	1.69709	20.6461	52.6875	73.3336	2.5	2.9	59988	0.00647036	13.6929	3.07	16.7629	5.3	0.9	40144
Chr1	160708846	160724608	SLAMF7	+	0.638641	6.87267	68.8536	75.7263	0.3	4.2	38317	0.438436	-4.50619	15.571	11.0648	0.1	0.1	29901
Chr1	160765863	160798045	LY9	+	0.247145	0.479803	83.8514	84.3312	0	0.1	23189	0.457345	22.5167	32.0606	54.5773	0.1	0.1	144913
Chr1	160799949	160832692	CD244	-	0.51819	-0.0178916	81.1298	81.1119	0	0.1	36947	0.144236	-1.455	32.998	31.543	1.2	0.6	114857
Chr1	160846329	160854960	ITLN1	-	1.24007	23.1166	65.8259	88.9425	0.8	1.2	6936	0.00647036	17.7666	27.8253	45.5919	1.7	1.2	22310
Chr1	160902254	160919712	LOC101928372	+	0.946747	-8.13435	91.4796	83.3453	0	0.1	7407	0.803338	-34.5792	64.697	30.1178	0.1	0.1	65668
Chr1	160914815	160924589	ITLN2	-	0	-4.4656	84.6385	80.1729	0	0.1	6368	0.254628	7.14438	24.2029	31.3472	0.1	0.1	53220
Chr1	160965000	160991133	F11R	-	9.09072	81.6483	3.03775	84.6861	0.9	1.7	412958	3.22586	53.8443	0.167826	54.0121	3.3	1.7	179650
Chr1	161007421	161008774	TSTD1	-	9.59483	58.1112	31.3524	89.4635	0.8	1	11777	6.19107	-1.08936	4.88269	3.79333	2.4	1.5	36855
Chr1	161009040	161015769	USF1	-	5.59446	76.7899	1.27808	78.068	1	1.7	97481	7.78831	43.7498	0.103946	43.8537	2.9	1.5	66118
Chr1	161016731	161039760	ARHGAP30	-	1.95263	6.56585	79.3378	85.9036	0	0.1	65391	0.132287	0.210369	39.3444	39.5548	0.1	0.1	46295
Chr1	161040780	161059385	PVRL4	-	0.112651	-7.55532	85.8769	78.3216	0	2.3	13472	0.0775439	3.64521	44.8716	48.5168	0.1	0.1	72781
Chr1	161068150	161070138	KLHDC9	+	0.285755	72.7993	6.01418	78.8135	1.9	1.2	8372	0.275097	44.3414	5.58599	49.9274	4.4	1.2	9300
Chr1	161087861	161095235	NIT1	+	4.03163	66.0051	16.7569	82.762	0.9	2.2	92301	1.38953	71.8101	1.57713	73.3872	3.1	2.1	78847
Chr1	161070345	161087866	PFDN2	-	16.9931	75.9322	16.7569	92.6891	2.1	1	78012	45.8646	66.1119	1.57713	67.689	3.1	1.1	107164
Chr1	161090768	161102478	DEDD	-	2.57671	87.6912	2.45773	90.1489	1.2	1.4	68888	1.79184	75.2232	0.740875	75.9641	4.4	2.9	56117
Chr1	161123533	161128646	UFC1	+	12.3265	52.883	40.3673	93.2503	0.6	1.1	56764	16.0986	30.3993	27.6419	58.0412	1.6	1.2	65057
Chr1	161129253	161135516	USP21	+	0.72858	81.6316	7.21429	88.8459	0.8	1.3	28149	1.32067	66.2287	2.82269	69.0514	2.8	1.1	59845
Chr1	161136180	161141010	PPOX	+	0.61238	88.4373	4.45227	92.8896	1.2	1.2	15226	0.804068	54.8264	3.27451	58.1009	3	1.2	39270
Chr1	161141099	161147758	B4GALT3	-	0.771505	63.3045	22.762	86.0666	0.5	1.5	82141	1.17136	47.2957	12.4022	59.6979	2.4	1.9	62748
Chr1	161159537	161168845	ADAMTS4	-	0.556288	16.5266	53.8567	70.3833	0.5	1.8	83414	0.245995	-0.199533	27.0441	26.8446	1	1	31264
Chr1	161169104	161184184	NDUFS2	+	32.5993	6.83111	51.8976	58.7287	2	0.4	231735	18.6621	22.2207	19.6785	41.8992	0.1	0.1	136132
Chr1	161185086	161189038	FCER1G	+	10.7009	-43.5011	88.8975	45.3963	0	0.1	137579	0.216446	-70.6004	77.6894	7.08902	0.1	0.1	9246
Chr1	161192082	161193418	APOA2	-	1475.39	7.43688	26.6781	34.115	0.3	1.4	78676	1.08271	-7.2725	7.2725	0	3.2	2	4075
Chr1	161195728	161200536	TOMM40L	+	1.3511	42.0965	10.8628	52.9594	4.5	2.4	121364	1.25174	29.6669	8.87545	38.5423	6.6	1.9	29618
Chr1	161196975	161197051	MIR5187	+	0	NA	14.3426	NA	5	1.3	3494	0.00647036	NA	17.0737	NA	5.8	0.8	505
Chr1	161199455	161208000	NR1I3	-	12.3782	32.6788	51.103	83.7818	1	2	93907	0.18307	12.6497	38.6881	51.3379	2.2	0.1	21199
Chr1	161228516	161255240	PCP4L1	+	0.290309	62.4766	22.7063	85.183	0.4	1	14414	0.00647036	-19.2534	44.9888	25.7354	0.1	0.1	45569
Chr1	161274524	161279762	MPZ	-	0.436486	-43.0465	83.2455	40.1989	0	0.1	37616	0.657138	20.1836	18.6307	38.8143	2.8	1.4	17900
Chr1	161284165	161334535	SDHC	+	12.1241	76.3871	14.6121	90.9992	0.6	1.2	127325	4.15088	75.0794	4.04453	79.1239	2.4	1.6	122778
Chr1	161334520	161337673	C1orf192	-	1.49762	29.4096	56.5914	86.001	1.2	2	9478	0.265889	44.0537	34.7056	78.7592	2.6	1.6	7651
Chr1	161475204	161489360	FCGR2A	+	1.77499	0.626779	83.2231	83.8498	0.1	2.2	22603	0.0756156	-37.5702	72.0315	34.4612	0.1	0.1	18616
Chr1	161494035	161496687	HSPA6	+	0.138166	51.4288	17.4464	68.8752	0.7	1.5	15039	0.512555	46.6419	27.2688	73.9107	1.4	0.8	50835
Chr1	161511550	161520413	FCGR3A	-	21.9933	4.07859	77.9433	82.0219	0	0.1	21957	0.00647036	9.76634	7.36385	17.1302	8	3	7527
Chr1	161551128	161571010	FCGR2C	+	1.5413	2.42912	81.8433	84.2725	2.8	3	4577	0.0937517	-2.62719	17.5787	14.9515	5.8	5.1	9907
Chr1	161575848	161578341	HSPA7	+	0.193477	43.7647	43.6202	87.3849	0.6	1	528	0.135174	-11.4098	62.0874	50.6776	0.1	0.1	1038
Chr1	161592987	161601753	FCGR3B	-	3.1168	-4.95289	84.8593	79.9064	0	0.1	9154	0.0715061	4.58119	8.71323	13.2944	4.7	2.8	5035
Chr1	161632904	161648444	FCGR2B	+	5.71093	-5.15371	85.9635	80.8098	2.6	3.1	11169	0.00647036	-6.61546	18.3777	11.7623	5.3	5.1	8349
Chr1	161653494	161655042	RPL31P11	-	0.187443	-25.5963	93.2463	67.65	0	0.1	1057	0.351675	-39.6525	39.6525	0	0.1	0.1	843
Chr1	161676761	161684142	FCRLA	+	0	16.7823	66.2977	83.08	0.7	2.2	3188	0.73069	10.8048	1.09923	11.9041	5.6	5.1	12663
Chr1	161691333	161697933	FCRLB	+	0	-52.897	71.4811	18.5841	0	1.2	78650	0.551018	3.94502	9.12579	13.0708	5.9	0.9	85353
Chr1	161719580	161726952	DUSP12	+	2.20522	82.5158	8.57543	91.0913	0.7	1.1	24063	8.73552	70.6808	3.25908	73.9399	1.8	1.4	74415
Chr1	161736033	161933860	ATF6	+	6.94735	88.6247	2.92304	91.5477	1.3	1.1	182379	4.1997	64.6233	0.507935	65.1312	2.7	1.4	237115
Chr1	161952981	161993644	OLFML2B	-	0.196412	67.4447	14.8688	82.3135	1.2	0.9	24396	0.00647036	-14.8408	30.1048	15.264	1.2	0.2	84306
Chr1	162039580	162339813	NOS1AP	+	1.65427	71.1408	11.8458	82.9865	0.8	1.7	930593	0.758803	43.7539	6.21396	49.9679	2.1	1.6	758217
Chr1	162126896	162126972	MIR4654	+	0	NA	94.8124	NA	0	0.1	313	0.00647036	NA	44.2958	NA	3.4	3.2	157
Chr1	162312335	162312430	MIR556	+	0	NA	94.8787	NA	0	0.1	0	0.00647036	NA	62.8708	NA	0.1	0.1	0
Chr1	162343514	162346644	C1orf111	-	0.0955987	-10.5442	97.0906	86.5464	0	0.1	6830	0.190911	-2.51323	62.2456	59.7323	0.2	0.2	9988
Chr1	162348695	162356608	C1orf226	+	1.85236	1.98689	89.5417	91.5286	0.4	1.1	17388	0.957767	9.36287	51.7339	61.0967	1.8	1.2	82402
Chr1	162365055	162381928	SH2D1B	-	0.100836	6.37076	77.553	83.9238	1.7	0.3	9405	0.143436	10.772	32.4342	43.2063	1.8	0.1	34698
Chr1	162466963	162499419	UHMK1	+	13.6873	62.3266	23.917	86.2436	0	0.1	54115	16.9148	50.7244	17.2802	68.0046	0.1	0.1	102110
Chr1	162531295	162569633	UAP1	+	13.8935	87.6515	1.65695	89.3084	1.1	1.8	117872	6.25579	61.4953	0.273857	61.7691	3.5	1.9	107166
Chr1	162602227	162750247	DDR2	+	0.833805	15.428	68.6315	84.0595	1.5	2.5	285757	0.0758959	-1.74526	13.4469	11.7016	3.8	0.1	200026
Chr1	162760495	162782608	HSD17B7	+	6.90511	69.2505	9.86563	79.1161	0.7	2	85804	4.04823	47.9928	5.08136	53.0742	6.5	1.5	9076
Chr1	162824086	162838605	C1orf110	-	0	-7.5829	88.3043	80.7214	0	0.1	6522	0.131336	10.4072	18.6176	29.0248	0.1	0.1	37591
Chr1	163038395	163046592	RGS4	+	0.270844	30.6383	25.3581	55.9965	0.6	5.1	11047	0.20325	0.957821	5.18559	6.14341	0.1	0.1	9838
Chr1	163131464	163182813	LOC101928404	+	0.071227	5.93272	74.09	80.0227	2.4	2.3	84774	0.0814017	-4.1619	15.8733	11.7114	3.9	2.2	67931
Chr1	163112088	163291581	RGS5	-	3.16491	83.5305	1.76182	85.2924	1.4	1	151951	1.00804	28.5039	1.50662	30.0105	2.9	1	239791
Chr1	163291722	163325553	NUF2	+	0.144381	92.7361	1.89545	94.6316	1.1	1.3	11128	20.6086	73.2604	0.336591	73.597	2.9	1.9	58927
Chr1	163390859	163392981	LOC100422212	-	0	-18.3697	86.1497	67.78	0	0.1	1295	0.00647036	-30.7437	30.7437	0	0.1	0.1	2484
Chr1	164528596	164821060	PBX1	+	1.51652	83.0346	1.93192	84.9665	1.8	2.7	382450	0.0595942	-0.282097	8.47733	8.19524	2	0.7	480375
Chr1	164738352	164743878	LOC100505795	-	0.0664781	32.7054	54.5654	87.2708	1.4	0.9	9622	0.00647036	0.236644	3.99439	4.23103	6	5.1	19543
Chr1	165171103	165325952	LMX1A	-	0.0425454	49.8025	9.57185	59.3744	0.5	5.1	230816	0.00647036	-43.768	54.4536	10.6857	0.1	0.1	250855
Chr1	165370158	165414592	RXRG	-	0.132071	57.254	20.5504	77.8044	0.3	5	54252	0.0612868	-14.215	22.6054	8.39037	0.1	0.1	75232
Chr1	165513477	165533185	LRRC52	+	0	31.3173	45.8503	77.1676	2.1	1	9885	0.00647036	-9.14759	15.7332	6.58565	0.1	0.1	36035
Chr1	165446078	165551341	LOC400794	-	0.112547	-13.7522	91.7791	78.0269	0	0.1	51057	0.164701	-56.3439	69.1384	12.7945	0.1	0.1	173418
Chr1	165600109	165625372	MGST3	+	5.98274	74.1349	3.99581	78.1307	0.9	1.8	119534	7.08106	27.4267	0.495567	27.9222	4.7	3.9	370481
Chr1	165631448	165667900	ALDH9A1	-	47.4733	63.8201	21.194	85.0141	0.4	2.7	113214	8.29184	48.8915	18.5771	67.4686	3.3	2.9	146601
Chr1	165667986	165679199	LOC440700	+	0.152858	61.708	21.7116	83.4196	2.7	0.4	11223	0.418258	19.3406	19.0841	38.4246	3.2	0.4	32556
Chr1	165693527	165738159	TMCO1	-	17.1649	84.6863	7.33605	92.0224	1.1	0.9	49079	19.1852	71.2325	3.60346	74.836	2.3	0.9	81466
Chr1	165796731	165880855	UCK2	+	0.766882	78.5289	3.35286	81.8818	0.8	2.3	194017	6.62054	45.2437	0.65084	45.8946	3.6	2.9	446368
Chr1	165877157	165877213	MIR3658	+	0	NA	84.879	NA	0	0.1	0	0.00647036	NA	58.7151	NA	0.1	0.1	56
Chr1	166123979	166124035	MIR921	-	0	NA	76.6424	NA	1.1	0.8	0	0.00647036	NA	0	NA	3.3	2.2	98
Chr1	166039255	166135958	FAM78B	-	0.128799	73.0568	3.08304	76.1398	1.1	2.1	43405	0.19313	-20.8404	36.0423	15.2019	5.2	0.2	153176
Chr1	166573152	166594473	FMO9P	+	0.111592	1.09791	75.0484	76.1463	0	0.1	6965	0.00647036	-1.82581	8.15615	6.33034	5	2.2	25830
Chr1	166808723	166823709	POGK	+	2.4783	83.0879	5.27533	88.3633	0.8	1.9	39752	4.50671	68.9326	2.08595	71.0186	3.1	2.3	54846
Chr1	166825748	166845654	TADA1	-	6.89299	76.1269	1.93116	78.0581	0.9	2.9	134307	5.33933	62.5398	0.48619	63.026	3.4	2.5	62522
Chr1	166882440	166944561	ILDR2	-	0.180562	50.5045	5.21857	55.723	1.4	0.9	24495	0.106369	29.2566	1.44185	30.6984	2.1	0.6	81594
Chr1	166944818	166991449	MAEL	+	0	79.3341	5.22193	84.5561	1	1.2	33162	0.124758	28.3845	0.934225	29.3187	2	1.3	48195
Chr1	167022081	167059868	GPA33	-	0.0550045	-21.6067	92.8127	71.206	0	0.1	17280	0.134768	-25.518	55.238	29.72	0.1	0.1	194274
Chr1	167064086	167098402	DUSP27	+	0.0446037	-14.5877	79.2019	64.6142	2.4	0.5	11741	0.0635441	-18.0942	45.04	26.9458	0.1	0.1	133652
Chr1	167144598	167165042	LINC01363	-	0.202469	-9.87395	92.9328	83.0588	0	0.1	6317	0.070331	-34.528	46.9624	12.4344	0.1	0.1	37175
Chr1	167190065	167396582	POU2F1	+	1.40899	84.0114	4.6537	88.6651	1.5	2.6	331645	2.33559	55.257	2.60239	57.8594	6.8	5.1	597288
Chr1	167399876	167487847	CD247	-	0.934915	-12.0063	82.2503	70.244	0.3	4.7	111375	0.147568	-15.5217	51.2775	35.7558	0.1	0.1	272793
Chr1	167510250	167523056	CREG1	-	35.6064	68.6717	10.4236	79.0954	0.8	1	92240	17.2219	45.8825	0.854664	46.7372	6.1	1.1	43653
Chr1	167599473	167675486	RCSD1	+	2.3145	59.8595	19.6518	79.5113	0.9	1.9	157128	0.153427	-9.60992	37.9317	28.3217	1.5	1.2	161821
Chr1	167691186	167761156	MPZL1	+	2.51279	87.7787	3.54229	91.321	1	1.7	109452	5.8831	63.8179	0.641509	64.4594	3.6	2.3	186466
Chr1	167778624	167883453	ADCY10	-	1.41029	55.2928	30.9455	86.2383	1.8	3.7	244019	0.114175	46.5762	1.98211	48.5583	5.6	4.6	271305
Chr1	167905796	168045083	DCAF6	+	30.8786	86.9184	2.2048	89.1232	2.9	2.4	432307	11.943	69.354	0.312701	69.6667	7.5	2.6	295994
Chr1	167885912	167906307	MPC2	-	20.8627	46.6349	2.20297	48.8379	1.8	3.6	262961	4.65055	13.0416	0.415269	13.4569	7.1	5.1	284446
Chr1	168048779	168106905	GPR161	-	0.208912	60.7574	17.1504	77.9077	0.3	2.5	61680	0.250302	20.246	9.43157	29.6776	5.1	4.9	129796
Chr1	168148082	168171351	TIPRL	+	12.0912	84.9035	9.48313	94.3866	0.4	1.6	78112	18.2811	64.4543	8.6749	73.1292	2.5	2.2	96047
Chr1	168195254	168212088	SFT2D2	+	4.81181	74.8549	7.65456	82.5095	0.7	1.3	162791	6.53099	39.884	1.95359	41.8375	4.2	3.4	203389
Chr1	168214818	168216668	ANKRD36BP1	-	2.45727	4.66797	86.9285	91.5964	0.6	1.1	3453	3.8953	3.28391	67.8996	71.1835	0.9	0.9	3260
Chr1	168250277	168283664	TBX19	+	0.0843022	-4.20525	95.6892	91.484	0	0.1	12726	0.166641	4.87029	57.3286	62.1989	0.1	0.1	58397
Chr1	168344761	168344859	MIR557	+	0	NA	89.8781	NA	0	0.1	54	0.00647036	NA	39.1076	NA	0.1	0.1	0
Chr1	168369426	168391894	LOC100505918	-	0.231626	3.94315	85.4075	89.3507	0.9	3.6	15000	0.186865	20.6588	26.203	46.8618	6.4	2.4	51755
Chr1	168510002	168513235	XCL2	-	0.242299	-2.43904	86.8011	84.3621	0	0.1	3805	0.355059	24.7341	11.19	35.9241	4.5	0.5	3404
Chr1	168545710	168551315	XCL1	+	0.136266	7.45461	79.6269	87.0815	3.3	0.5	2205	0.196671	33.1988	15.904	49.1028	5.8	2.1	5069
Chr1	168664694	168698442	DPT	-	5.22253	1.06556	86.3382	87.4038	0	1.8	36678	0.00647036	1.79689	39.9511	41.748	0.1	0.1	83684
Chr1	168756178	168762126	LINC00626	+	0	-5.8696	94.3877	88.5181	0	0.1	3910	0.00647036	0.4793	48.5478	49.0271	0.1	0.1	9748
Chr1	168873142	169056243	LINC00970	-	0.6387	5.25678	79.2705	84.5273	1.5	2.1	127382	0.641099	-0.545828	39.7778	39.2319	5.6	5.1	462600
Chr1	169075946	169101960	ATP1B1	+	30.3358	67.9042	3.3429	71.2471	1.4	4.5	285150	94.8133	17.0226	0.0896414	17.1123	7.1	5.1	582661
Chr1	169337193	169365780	BLZF1	+	8.29936	87.9726	3.59109	91.5637	1.4	1.6	49436	9.84624	72.7519	1.10888	73.8608	3.4	2.2	69740
Chr1	169101767	169337201	NME7	-	2.62024	81.8645	3.59109	85.4556	1.5	1.5	315578	5.09052	49.0025	1.10888	50.1114	3.4	1.3	496046
Chr1	169364113	169396670	CCDC181	-	0.108225	61.4667	20.349	81.8157	1	1.1	8587	0.563168	12.087	24.6841	36.771	0.1	0.1	35473
Chr1	169433148	169455208	SLC19A2	-	3.64908	82.6634	0.451791	83.1152	1.3	3	188446	4.04085	53.0907	0.40816	53.4989	6.2	3.4	120442
Chr1	169481191	169555769	F5	-	45.456	59.6887	20.0733	79.762	1.1	2.5	372809	0.885431	41.1661	1.83529	43.0014	4.8	2.7	282418
Chr1	169558087	169599377	SELP	-	0.425847	-0.772959	79.8067	79.0337	2.6	1.1	48184	0.00647036	13.0526	5.55923	18.6118	5.8	2.1	68294
Chr1	169659805	169680843	SELL	-	0.887947	45.2347	37.7443	82.979	2.7	1.5	36035	0.749089	17.188	23.5992	40.7871	5.2	0.8	36629
Chr1	169691780	169703220	SELE	-	0.498887	-11.5951	86.6414	75.0463	0	0.1	55530	0.092663	-18.4074	28.6091	10.2017	0.1	0.1	27336
Chr1	169761669	169764061	METTL18	-	2.33067	76.9664	3.03363	80	1.3	1.7	31824	4.66842	34.1662	2.49975	36.666	4	2.7	35359
Chr1	169764549	169822229	C1orf112	+	0.789228	87.2165	5.60673	92.8232	2.1	0.9	29788	3.41992	71.9175	4.58883	76.5063	4	0.9	77221
Chr1	169822214	169863100	SCYL3	-	5.01193	86.6557	3.83763	90.4934	0.9	3	133448	2.73471	73.1744	0.872639	74.0471	4.4	3.4	170117
Chr1	169890469	170043879	KIFAP3	-	5.11145	81.5829	7.33301	88.9159	0.7	1.1	95014	3.96745	48.2498	1.59768	49.8475	2.3	1.5	188965
Chr1	170115187	170136923	METTL11B	+	0	35.8123	42.0935	77.9058	2.4	1.8	8159	0.146225	18.7029	1.82	20.5229	4.9	2.8	28036
Chr1	170120518	170120603	MIR3119-2	+	0	NA	75.1878	NA	0	0.1	0	0.00647036	NA	18.0575	NA	0.1	0.1	168
Chr1	170240545	170253349	LINC01142	-	0	-11.9966	71.0626	59.066	0	0.1	2587	0.00647036	-8.0048	10.0423	2.03746	0.1	0.1	11573
Chr1	170501262	170522974	GORAB	+	2.34015	84.7446	6.83083	91.5755	1.2	1.3	58404	3.66052	71.3406	0.398144	71.7388	3.1	1.8	61073
Chr1	170633312	170708541	PRRX1	+	0.295119	52.0016	3.96923	55.9708	3.7	1.3	45508	0.399625	-4.38464	19.9576	15.573	2.6	0.7	98619
Chr1	170904611	171033906	MROH9	+	0.043073	-0.796474	81.5718	80.7753	0	0.1	38805	0.00647036	5.06955	1.82533	6.89489	3.5	1.2	154439
Chr1	171060017	171086959	FMO3	+	86.3099	36.0809	38.5565	74.6374	1.6	5.1	102744	0.457107	7.24008	1.43211	8.67219	5.5	2.3	34194
Chr1	171070879	171070939	MIR1295B	+	18.865	NA	87.3047	NA	0	0.1	51	0.00647036	NA	1.54889	NA	5.2	5.1	34
Chr1	171070868	171070947	MIR1295A	-	0	NA	87.3047	NA	0	0.1	74	0.00647036	NA	1.54889	NA	5.2	0.2	64
Chr1	171106878	171130702	FMO6P	+	0.15763	5.18042	73.4967	78.6771	0	0.1	199457	0.0925588	10.5927	1.25923	11.852	0.1	0.1	79492
Chr1	171154387	171181822	FMO2	+	0.725523	10.6117	68.8037	79.4155	0	0.1	80267	0.00647036	5.49982	7.71333	13.2132	0.1	0.1	73227
Chr1	171217609	171255117	FMO1	+	0.0713345	18.6834	53.6511	72.3346	0.4	0.9	24057	0.093219	13.4962	0.520625	14.0169	2.7	0.7	63364
Chr1	171283485	171311223	FMO4	+	14.6647	67.7691	17.2981	85.0672	1.4	1.9	116535	0.27987	28.1347	1.90613	30.0409	3.5	1.8	42182
Chr1	171308034	171310463	TOP1P1	+	1.48989	6.51488	86.1396	92.6544	0	0.1	2597	0.614034	32.8653	11.0952	43.9605	3.8	1	1304
Chr1	171454665	171562650	PRRC2C	+	13.4215	90.2904	1.60164	91.8921	0.9	3	193774	11.9966	71.3291	0.786992	72.1161	5.1	3.9	265828
Chr1	171604556	171621773	MYOC	-	0	-10.3443	86.418	76.0737	0	0.1	27641	0.00647036	-1.54569	25.6756	24.1299	0.1	0.1	44783
Chr1	171669295	171711379	VAMP4	-	2.99107	90.0499	1.59906	91.649	1.4	1.6	64903	2.22025	51.3289	0.306788	51.6357	4.8	2.8	72327
Chr1	171750760	171766856	METTL13	+	3.34536	78.4509	12.8695	91.3204	0.9	1	20276	10.9863	73.0441	3.74072	76.7849	2.1	1.2	70048
Chr1	171810617	172381857	DNM3	+	0.226368	70.3534	10.8948	81.2481	0.7	1.7	411719	0.180724	-31.4944	63.6914	32.197	0.1	0.1	1259644
Chr1	172107947	172108028	MIR3120	+	0	NA	84.6917	NA	0	0.1	850	0.00647036	NA	70.6114	NA	0.1	0.1	313
Chr1	172107937	172108047	MIR214	-	0	NA	84.6917	NA	0	0.1	1150	0.00647036	NA	70.6114	NA	0.1	0.1	444
Chr1	172113674	172113784	MIR199A2	-	2.34899	NA	71.4297	NA	1.3	4.3	2907	0.00647036	NA	77.2803	NA	0.1	0.1	227
Chr1	172106018	172113975	DNM3OS	-	0.623957	-1.18558	71.1992	70.0136	1.1	4.5	37700	0.162471	-34.9537	75.7332	40.7795	0.1	0.1	15435
Chr1	172389827	172437969	C1orf105	+	0.0697997	-24.0985	91.267	67.1685	0	0.1	50658	0.141377	6.82867	20.9088	27.7374	4.5	0.1	404640
Chr1	172410596	172413230	PIGC	-	1.90531	88.1198	7.10641	95.2262	0.8	1.1	7396	4.27151	36.5548	1.76821	38.323	3.9	1.9	60264
Chr1	172501488	172580975	SUCO	+	3.49985	85.9417	0.896959	86.8387	1.1	2.7	138618	6.90317	57.2006	1.08722	58.2878	5.1	4.2	201689
Chr1	172628184	172636012	FASLG	+	0.191422	-5.28703	77.0368	71.7497	0	0.1	12419	0.145222	-11.1706	61.3242	50.1536	2.2	0.3	15052
Chr1	173010359	173020103	TNFSF18	-	0	44.3163	40.3857	84.702	2.2	2.1	6629	0.00647036	36.4966	3.88875	40.3854	5.2	2.1	23348
Chr1	173152869	173176471	TNFSF4	-	0.125547	20.9038	58.8371	79.7409	0.3	5.1	34018	0.0742793	30.3035	4.44	34.7435	0.1	0.1	68273
Chr1	173204198	173446294	LOC100506023	-	0.444486	84.2106	1.47009	85.6807	2.3	2.4	247821	0.283416	29.2896	0.242692	29.5323	6.8	3	425959
Chr1	173446485	173457946	PRDX6	+	55.3066	81.6264	1.3515	82.9779	2.5	2.2	147196	39.4228	49.5479	0.234947	49.7829	6.6	3.5	112420
Chr1	173469603	173572233	SLC9C2	-	0.0408187	16.1221	67.4429	83.565	2.4	1.3	141367	0.00647036	8.95112	15.2106	24.1617	6.4	2.6	150416
Chr1	173604660	173606272	LOC730159	+	0	-15.716	90.716	75	0	0.1	442	0.00647036	NA	22.0786	NA	4.7	4.1	707
Chr1	173577474	173639001	ANKRD45	-	0.224435	65.0308	20.042	85.0728	0.8	0.8	18797	0.405287	-16.5494	56.4142	39.8648	0.1	0.1	81736
Chr1	173684079	173755840	KLHL20	+	3.44181	84.5278	6.03952	90.5673	0.3	2.9	145679	2.03647	71.0982	0.4167	71.5149	4	3.2	173774
Chr1	173768687	173793777	CENPL	-	0.291903	84.0656	7.31	91.3756	1.1	1.6	21673	5.20413	69.0164	7.67485	76.6912	3.1	2.1	69870
Chr1	173793796	173827682	DARS2	+	4.31214	86.4498	7.31	93.7598	1.5	1.1	54739	8.84596	68.7104	7.67485	76.3853	3.1	1.1	86359
Chr1	173832385	173833079	GAS5-AS1	+	0.46598	NA	87.7297	NA	0	0.1	1858	2.82213	NA	9.39333	NA	2.2	0.7	911
Chr1	173833312	173833355	SNORD81	-	958.376	NA	87.5521	NA	0	0.1	197	0.00647036	NA	18.587	NA	0.1	0.1	30
Chr1	173833506	173833583	SNORD47	-	276.338	NA	87.6056	NA	0	0.1	86	375.679	NA	16.8973	NA	0.1	0.1	149
Chr1	173833970	173834041	SNORD80	-	507.909	NA	84.4538	NA	0	0.1	749	80.484	NA	14.8696	NA	4.9	0.1	672
Chr1	173834487	173834568	SNORD79	-	2158.47	NA	85.4244	NA	0	0.1	121	7378.28	NA	12.0396	NA	5	0.7	472
Chr1	173834770	173834824	SNORD78	-	114.777	NA	85.4244	NA	0	0.1	187	597.975	NA	12.0396	NA	4.9	0.9	277
Chr1	173835105	173835166	SNORD44	-	1624.27	NA	77.855	NA	0	0.1	143	4188.46	NA	0.649091	NA	5	1.3	357
Chr1	173835448	173835509	SNORD77	-	397.083	NA	38.7403	NA	0	0.1	306	100.526	NA	0.43	NA	5	1.6	121
Chr1	173835772	173835853	SNORD76	-	1520.22	NA	21.0355	NA	3.5	0.1	641	2401.97	NA	0.212055	NA	5	2	498
Chr1	173836016	173836076	SNORD75	-	629.001	NA	17.4392	NA	3.2	0.3	458	795.841	NA	0.177931	NA	5	2.2	712
Chr1	173836811	173836883	SNORD74	-	2509.66	NA	11.3792	NA	2.4	1.2	3822	401.69	NA	0.823766	NA	5.2	3.1	5534
Chr1	173833038	173837125	GAS5	-	6.32858	74.1088	10.2599	84.3688	2.2	1.5	37388	17.2628	11.4569	0.934386	12.3913	5.2	3.4	65913
Chr1	173837492	173855774	ZBTB37	+	1.93569	86.5113	5.10562	91.6169	1.8	1.9	76447	1.90771	69.6775	1.02316	70.7007	5.3	1.6	88207
Chr1	173872941	173886516	SERPINC1	-	430.047	41.8757	39.4711	81.3468	1	3.3	66349	0.413576	27.334	17.5924	44.9263	4	3.2	24270
Chr1	173900351	173962210	RC3H1	-	4.52876	-0.767534	94.4449	93.6774	0.9	0.9	57909	3.2524	-5.56222	83.2478	77.6856	0.1	0.1	85142
Chr1	174128551	174964445	RABGAP1L	+	7.24828	87.3836	2.36004	89.7436	0.9	1.4	708741	4.56151	52.6287	0.810517	53.4392	2.7	1.6	1154876
Chr1	174417211	174418683	GPR52	+	0.329165	-10.3339	95.4327	85.0987	0.4	3.9	881	0.210126	3.92894	56.9848	60.9138	0.1	0.1	3744
Chr1	174968570	174981163	CACYBP	+	12.6555	76.8094	2.09019	78.8996	1.1	2.2	121870	24.5211	26.6293	1.67752	28.3068	5.6	4.4	147728
Chr1	174982093	174992591	MRPS14	-	7.1164	81.6151	11.7749	93.39	0.5	1.9	41211	3.77903	49.2841	13.6439	62.928	3.5	3.1	40557
Chr1	175036993	175117202	TNN	+	0.307457	3.4893	78.221	81.7103	1.1	0.4	100159	0.00647036	5.45998	8.53658	13.9966	0.1	0.1	131262
Chr1	175126122	175162229	KIAA0040	-	2.29409	75.6438	12.5857	88.2295	0.6	1.9	96887	0.234219	3.62242	2.66243	6.28486	2.4	1.4	60672
Chr1	175291934	175712752	TNR	-	0.0663469	55.3948	20.9444	76.3392	1.4	2.4	237279	0.0712412	1.40853	3.21	4.61853	0.1	0.1	626186
Chr1	175937532	175937676	SCARNA3	-	113.286	NA	87.33	NA	1.7	1.1	253	96.0633	NA	80.9057	NA	0.1	0.1	107
Chr1	175913961	176176380	RFWD2	-	7.76422	89.501	2.18744	91.6885	1.2	2.3	203169	15.2343	71.0366	0.421993	71.4586	5.1	3.4	404632
Chr1	176432306	176811970	PAPPA2	+	0.0957081	5.32616	75.5531	80.8793	1.3	3.2	264471	0.158341	2.63165	2.71474	5.34639	5.5	0.5	476028
Chr1	176998498	176998581	MIR488	-	0	NA	78.7247	NA	3	0.1	45	0.00647036	NA	5.26133	NA	0.1	0.1	166
Chr1	176826440	177134040	ASTN1	-	0.0765317	69.5896	3.10139	72.691	1.3	1.2	106664	0.00647036	-24.2338	29.5476	5.3138	0.1	0.1	442179
Chr1	177140632	177251558	BRINP2	+	0.0699487	67.277	8.74066	76.0177	1.5	1.2	67096	0.0731197	-2.97138	30.0264	27.055	0.1	0.1	240616
Chr1	177669658	177679465	LOC101928778	+	0	-2.72563	74.2525	71.5269	1.8	2.2	21277	0.00647036	-0.155081	1.13625	0.981169	5.1	5.1	15952
Chr1	177898241	177939050	SEC16B	-	12.8284	48.3587	38.6817	87.0404	1.3	2.2	224868	1.54531	53.0151	1.14761	54.1628	3.2	1.7	118169
Chr1	177975274	178007142	LOC730102	-	3.8191	57.1846	27.412	84.5966	0.6	0.8	196863	1.72985	32.7502	11.3346	44.0848	3.5	3	127830
Chr1	178062863	178448648	RASAL2	+	1.11936	84.0886	4.70868	88.7972	0.9	2.2	270193	1.9019	60.3375	1.57665	61.9142	6	5.1	651472
Chr1	178060642	178063128	RASAL2-AS1	-	0.345825	82.4844	3.11674	85.6012	1.8	1.2	16921	0.498232	44.4984	0.799836	45.2982	6.2	1.2	23911
Chr1	178482211	178492635	TEX35	+	0.0940877	1.23578	87.0109	88.2466	0	0.1	5491	0.309972	-17.1942	46.0585	28.8643	0.1	0.1	24052
Chr1	178511930	178518024	C1orf220	+	0.429155	76.8021	7.25478	84.0569	1.3	1.3	36590	0.494629	65.1398	3.11592	68.2557	4.1	1.4	90829
Chr1	178646883	178646969	MIR4424	+	0	NA	95.9286	NA	0	0.1	0	0.00647036	NA	37.5256	NA	0.1	0.1	172
Chr1	178694281	178890977	RALGPS2	+	8.2697	79.7902	7.52445	87.3146	0.6	4	389814	5.50047	60.3898	3.19646	63.5863	4.9	4.3	292846
Chr1	178818669	178840215	ANGPTL1	-	3.46962	62.0827	24.7444	86.8272	2	3.4	70550	0.557531	34.4845	26.6075	61.092	5.9	4.3	19715
Chr1	178995073	179045702	FAM20B	+	4.58996	74.9938	15.2098	90.2036	0.7	2.1	79940	10.2271	55.3743	8.89719	64.2715	2.7	2.2	426646
Chr1	179051111	179065129	TOR3A	+	9.89321	74.2414	3.16202	77.4034	1.1	1.8	146500	21.0024	56.553	0.521842	57.0748	3.6	2	169021
Chr1	179068461	179198819	ABL2	-	2.24222	83.548	6.22876	89.7768	0.9	1.4	318051	2.25967	61.1926	1.70643	62.899	4	1.2	379218
Chr1	179262848	179327814	SOAT1	+	2.9697	75.9933	14.4498	90.443	0.7	1.2	103657	4.96209	67.7415	1.88215	69.6237	4.6	2.3	208891
Chr1	179334854	179523870	AXDND1	+	0.0605819	44.9673	33.951	78.9183	0.4	1.2	90871	0.20916	13.6906	12.7788	26.4693	1.8	1.2	300719
Chr1	179519673	179545084	NPHS2	-	0	63.9353	11.5796	75.5149	1.2	0.9	8159	0.00647036	-5.50098	29.2553	23.7544	0.1	0.1	41968
Chr1	179560747	179660407	TDRD5	+	0.0584624	49.3515	27.9865	77.338	0.6	1.1	30248	0.521153	-39.2547	63.132	23.8773	0.1	0.1	101550
Chr1	179712297	179785333	FAM163A	+	0.142029	66.9234	3.6221	70.5455	1.2	2.3	47656	0.164524	-51.6103	64.5435	12.9333	0.1	0.1	136649
Chr1	179809101	179846941	TOR1AIP2	-	18.0695	81.7632	10.5528	92.3161	0.6	1.6	141426	8.65711	68.9921	0.807262	69.7994	3.3	2	137920
Chr1	179851176	179889212	TOR1AIP1	+	9.68356	81.9777	4.44843	86.4261	0.9	2.4	163868	2.8502	70.5014	0.185825	70.6872	4.6	3	193170
Chr1	179923907	180084015	CEP350	+	6.72776	90.0566	2.60503	92.6616	1	1.8	180414	6.32157	74.2992	0.701837	75.001	4	3	259967
Chr1	180123967	180167169	QSOX1	+	3.8474	73.6301	9.2686	82.8987	0.8	1.2	93545	4.57427	35.78	7.18657	42.9665	2	1.5	140688
Chr1	180167143	180169859	FLJ23867	+	0.385481	0.59362	89.3478	89.9415	1.1	1.2	966	0.188511	17.9153	48.8945	66.8098	1.1	0.6	9914
Chr1	180199432	180244188	LHX4	+	0.158256	49.509	2.57853	52.0876	2.3	5.1	32576	0.674823	-7.63356	45.3538	37.7202	0.9	0.3	197146
Chr1	180238797	180243816	LHX4-AS1	-	0.240364	-14.6627	96.7057	82.0429	0	0.1	14129	0.595642	-78.6472	91.416	12.7688	0.1	0.1	50536
Chr1	180407448	180407525	MIR3121	-	0	NA	96.4812	NA	0.7	3	21	0.00647036	NA	82.6696	NA	3.3	2.4	77
Chr1	180257351	180472022	ACBD6	-	5.64888	88.0483	4.20399	92.2523	0.8	1.3	137672	16.9931	67.0532	0.565672	67.6188	2.7	1.5	415975
Chr1	180601145	180859415	XPR1	+	1.25415	87.5389	4.43302	91.9719	0.9	2	132780	4.66208	62.7337	5.93333	68.667	3.2	2.9	367746
Chr1	180882312	180915239	KIAA1614	+	0.123552	67.611	14.0358	81.6468	1.3	0.6	22647	0.227144	-3.05177	37.943	34.8913	0.1	0.1	89515
Chr1	180941849	180992257	STX6	-	1.36997	75.2724	14.8281	90.1006	0.5	2	97036	4.6219	63.5716	9.11211	72.6838	2.9	2.6	119476
Chr1	181002560	181031074	MR1	+	1.22102	66.6652	24.9889	91.6541	0.4	1.9	82026	0.462086	28.8382	20.7937	49.632	1.8	1.7	75789
Chr1	181057637	181059979	IER5	+	0.833661	-3.75282	5.26993	1.51711	0.6	2.6	58207	7.064	-1.12055	1.21776	0.0972109	5.6	4.9	100288
Chr1	181205523	181207740	GM140	+	0	11.1522	71.0987	82.2509	0	0.1	398	0.00647036	-13.0787	14.3295	1.25083	0.1	0.1	3629
Chr1	181452685	181775921	CACNA1E	+	0.04529	66.11	6.43776	72.5478	1.8	0.8	153742	0.128428	-15.6812	21.6299	5.94867	0.9	0.4	538241
Chr1	182023704	182030847	ZNF648	-	0.260288	-16.5748	68.6218	52.0471	1.1	0.8	3383	0.00647036	39.2618	1.25536	40.5171	9	4	14017
Chr1	182173079	182283196	LINC01344	-	0.523409	-3.00123	90.165	87.1638	1.8	1.6	321783	0.223739	-26.9874	60.1088	33.1213	0.1	0.1	552144
Chr1	182350838	182361341	GLUL	-	56.9168	28.1826	8.10039	36.283	0.5	3.6	102322	6.6927	31.1578	4.19165	35.3494	3.7	3.2	159576
Chr1	182367251	182369751	TEDDM1	-	0.310075	0.87	82.7057	83.5757	0	0.1	3100	0.252982	-4.25834	16.961	12.7027	0.1	0.1	5322
Chr1	182376755	182383948	LINC00272	+	0.432079	23.9584	54.974	78.9324	1.9	2.6	12935	0.00647036	7.79257	2.04071	9.83329	5	3.2	10777
Chr1	182419255	182529732	RGSL1	+	0.0572017	-9.68954	90.5175	80.828	0	0.1	62486	0.00647036	17.6359	0	17.6359	7	5.1	145751
Chr1	182542768	182558394	RNASEL	-	1.10873	57.0146	31.9652	88.9798	0.4	2	52795	2.24385	56.3339	5.28578	61.6197	5.3	2.1	66240
Chr1	182567757	182573548	RGS16	-	10.1502	50.8874	11.8276	62.7149	0.6	3.7	59563	0.376864	16.0809	4.66232	20.7432	2.4	1.8	14819
Chr1	182584274	182585764	LOC284648	+	0.0807948	-7.28662	11.8179	4.53125	0.9	2.9	20647	0.00647036	5.58398	4.92286	10.5068	4.7	3.8	6945
Chr1	182615791	182642067	RGS8	-	0	20.2558	62.0471	82.3028	0.8	1.8	14201	0.00647036	12.1377	3.68743	15.8251	7.1	2.1	40536
Chr1	182758583	182799519	NPL	+	2.66226	82.4337	4.16811	86.6018	0.7	1.1	85224	0.975186	49.0519	0.675556	49.7274	7.2	2.2	89638
Chr1	182808438	182857117	DHX9	+	18.3938	73.1845	14.6767	87.8612	0.6	1.7	96795	72.9518	57.6206	7.47277	65.0933	4.5	3.7	177267
Chr1	182868999	182922553	SHCBP1L	-	0.0392418	36.6698	44.9992	81.6689	0.1	1.4	16716	0.0907593	-40.4906	84.1031	43.6124	0.1	0.1	73288
Chr1	182992594	183114727	LAMC1	+	7.04259	85.7759	1.83242	87.6083	1.3	1.9	169622	13.4093	62.3651	0.485488	62.8506	5.2	3.1	267051
Chr1	183155173	183214262	LAMC2	+	0.153945	54.6091	26.962	81.5711	0.6	1.3	72461	2.10303	33.2142	12.631	45.8451	6.5	5.1	154269
Chr1	183217371	183387634	NMNAT2	-	0.426201	51.2608	26.7481	78.0089	0.4	2.3	95122	0.343095	-22.9481	54.2058	31.2576	0.1	0.1	372473
Chr1	183430010	183441117	SMG7-AS1	-	0.148347	42.7795	1.42183	44.2013	1.6	2.3	202902	0.469856	15.3403	0.358045	15.6983	6.7	4.8	127048
Chr1	183441505	183523328	SMG7	+	4.16476	90.0122	1.38011	91.3923	2.6	1.3	125296	4.2148	64.3588	0.56183	64.9206	6.6	1.6	238160
Chr1	183524696	183560056	NCF2	-	1.49507	-3.10512	89.4091	86.3039	0	1.7	90228	0.566026	14.935	33.9203	48.8553	3.8	3.4	86319
Chr1	183595327	183605076	ARPC5	-	9.78773	67.5427	1.01064	68.5533	1.2	3.7	71930	25.7065	40.5603	0.241106	40.8014	5.3	3.9	106715
[truncated: 23,684 more rows]
